# Supplementary material for: Eremophilane-Type Sesquiterpenes from a Marine-Derived Fungus Penicillium Copticola with Antitumor and Neuroprotective Activities
Source: MDPI journal article supplement (doi:10.3390/md20110712), 2022-11-13

Eremophilane-type sesquiterpenes from a marine-derived *Penicillium copticola*  
fungus with antitumor and neuroprotective activities

## **Supporting Information**

ITS-sequence of fungus

```
CTCTGGGTCCACCTCCCACCCGTGTTTTCCGAACCCTGTTGCTTCGGCGGG
CCCGCCTCACGGCCGCCGGGGGGCTTCCGCCCCCGGGCCCGCGCCCGCCG
AAGACACCTGTGAACGCTGTCTGAAGTTGCAGTCTGAGAACTAGCTAGA
TTAGTTAAAACTTTCAACAACGGATCTCTTGGTTCCGGCATCGATGAAGA
ACGCAGCGAAATGCGATAACTAATGTGAATTGCACAATTCAGGAATCATC
GAGTCTTTGAACGCACATGGCGCCCTCTGGTATTCCGGAGGGGCATGCCTG
TCCGAGCGTCATTGCTGCCCTCAAGCACGGCTTGTGTGTTGGGCCCCACCC
CCCCGCCCTGCCCGAAGGCGGGGGCGCGGGGGGGGGGCAGAACCGAGCC
CAATCCTAATGACGAATGGGAGGTGAGACCACACCTGTTTGTATTGACCC
GATCGCCAGCCGCTGACCCACCTAAATTATTTTTTCAGGTTGA
```

UPLC screening:

| t/min | (mL/min) | A (MeCN) | B (H <sub>2</sub> O +0.04%TFA ) |
|-------|----------|----------|---------------------------------|
| 0     | 0.4      | 10       | 90                              |
| 7     | 0.4      | 100      | 0                               |
| 8     | 0.4      | 100      | 0                               |
| 8.01  | 0.4      | 10       | 90                              |
| 10    | 0.4      | 10       | 90                              |

WZXY-SX-10-26-1

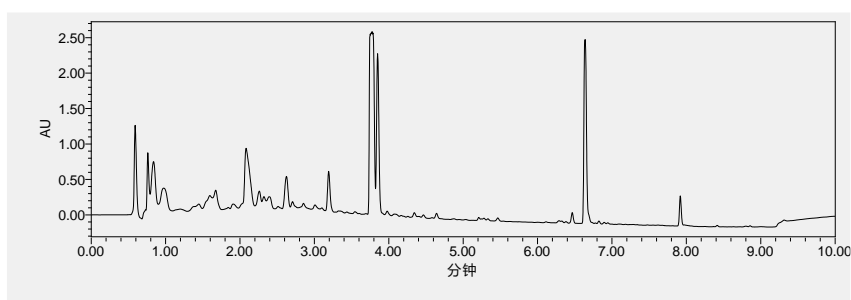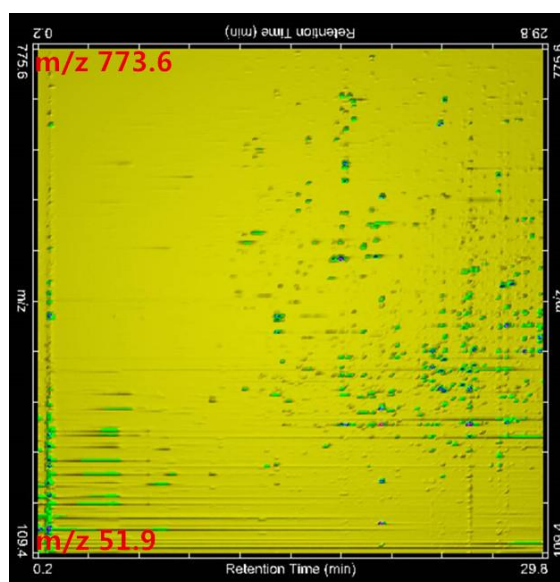

LC-MS spectrum of EtOAc extract of WZXY-SX-10-26-1 fungal strain

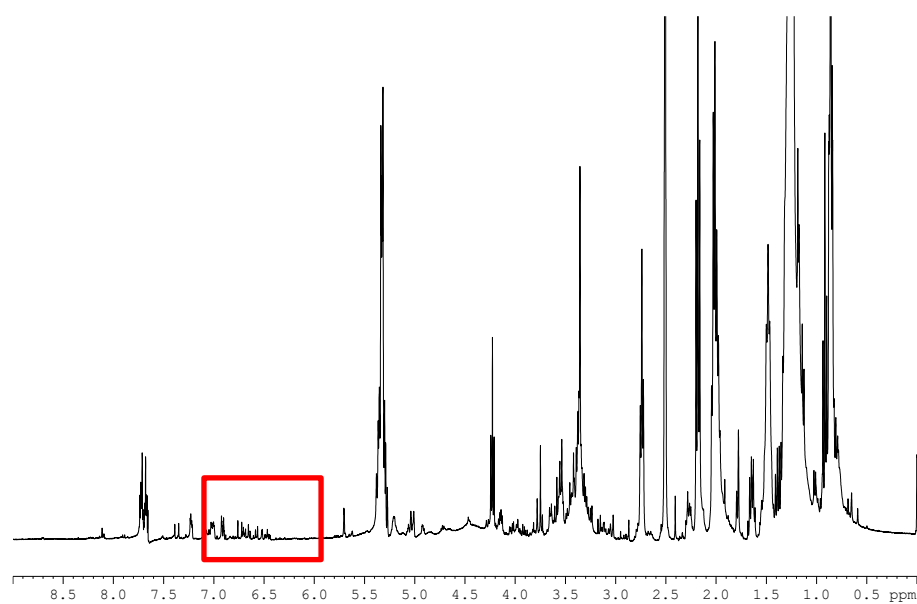

$^1\text{H}$  NMR spectrum of EtOAc extract of WZXY-SX-10-26-1 fungal strain

Figure S1. IR spectrum of **1**

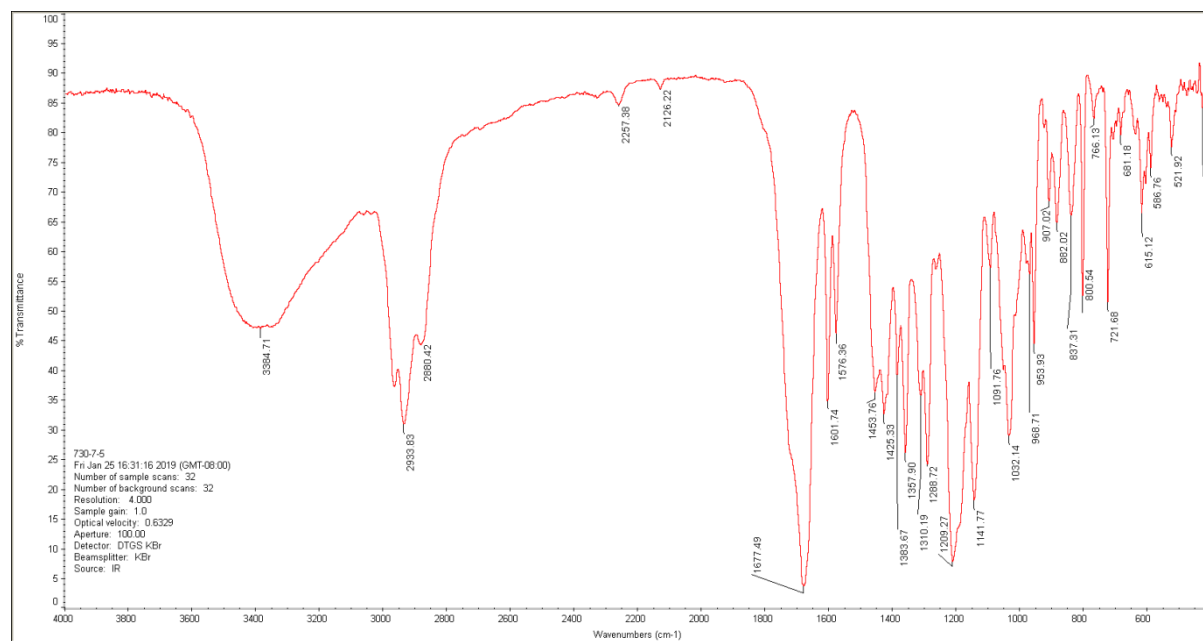

Figure S2.  $^1\text{H}$  NMR (600 MHz) spectrum of **1** in  $\text{DMSO-}d_6$

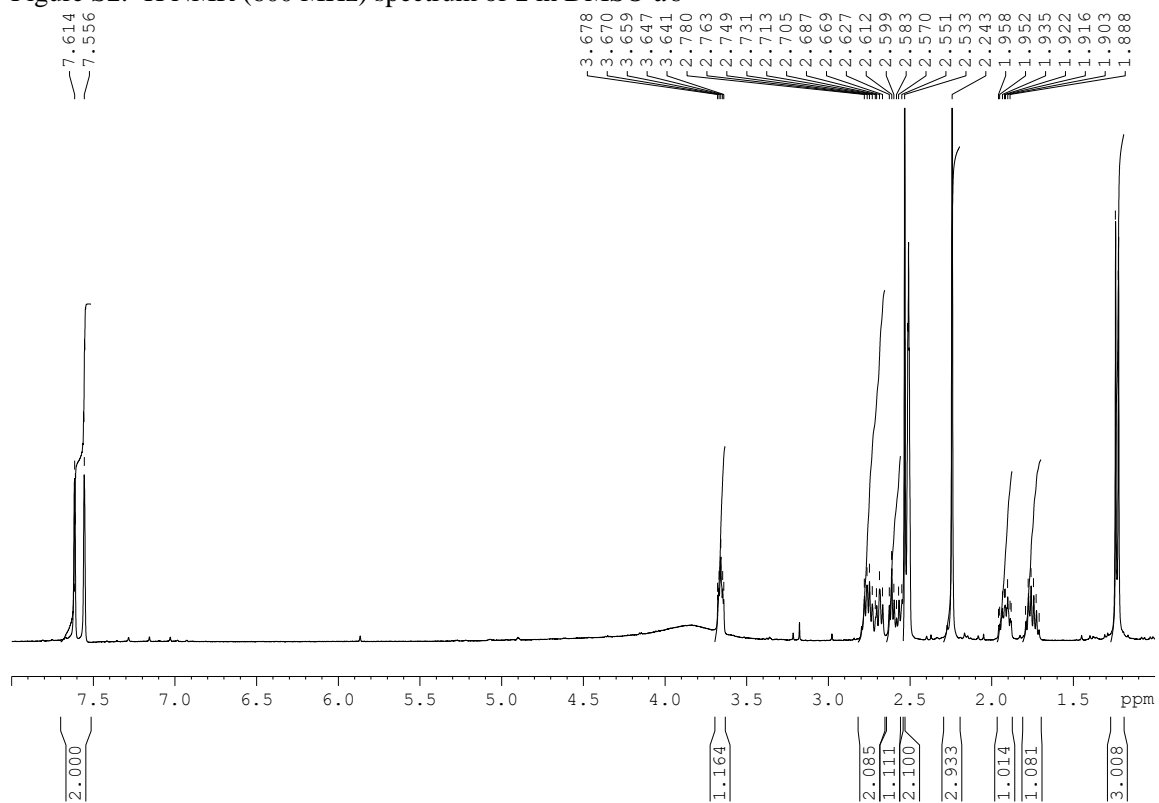



Figure S3.  $^{13}\text{C}$  NMR (150 MHz) spectrum of **1** in  $\text{DMSO-}d_6$

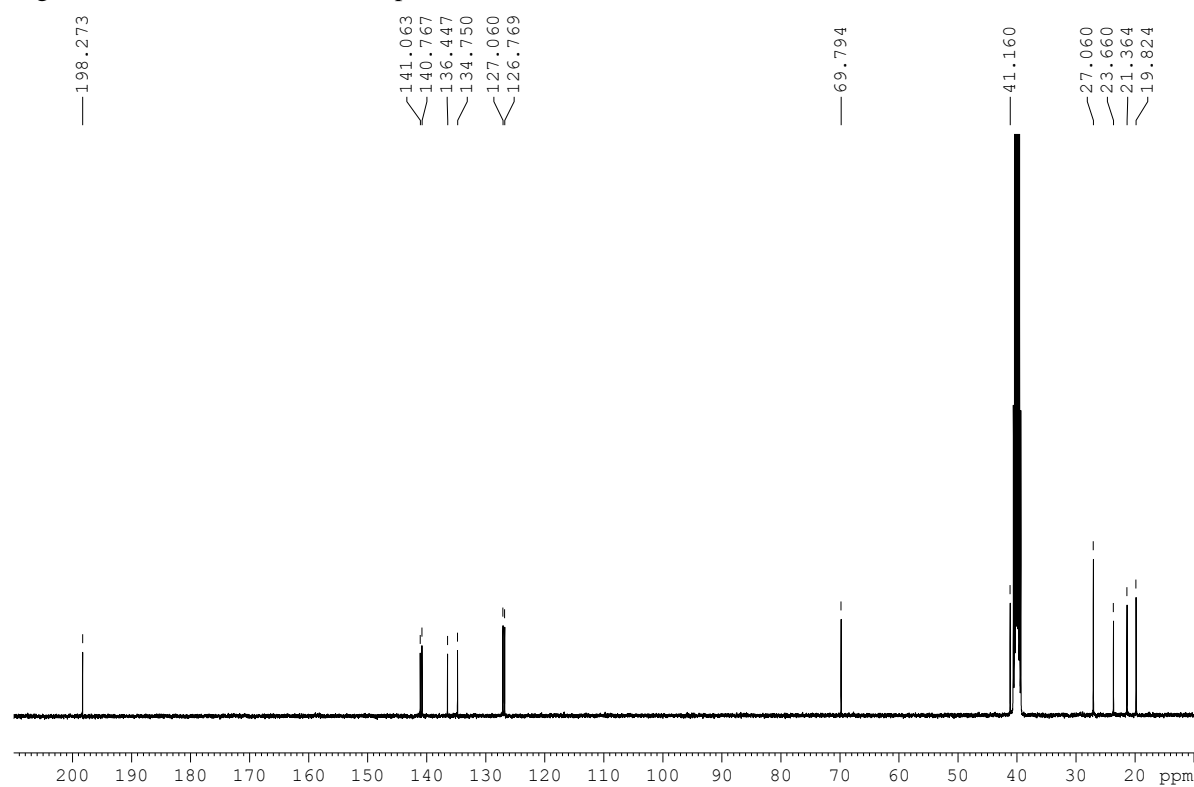

Figure S4.  $^1\text{H}$ - $^1\text{H}$  COSY spectrum of **1** in  $\text{DMSO-}d_6$

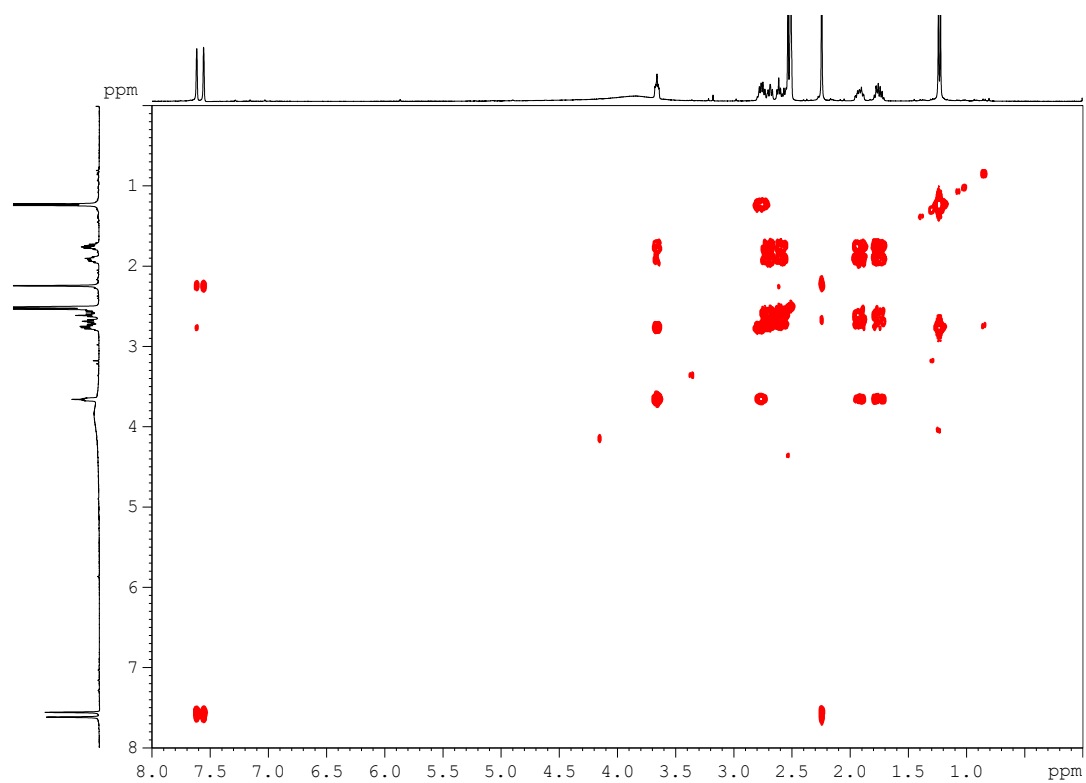

Figure S5. HSQC spectrum of **1** in DMSO-*d*<sub>6</sub>

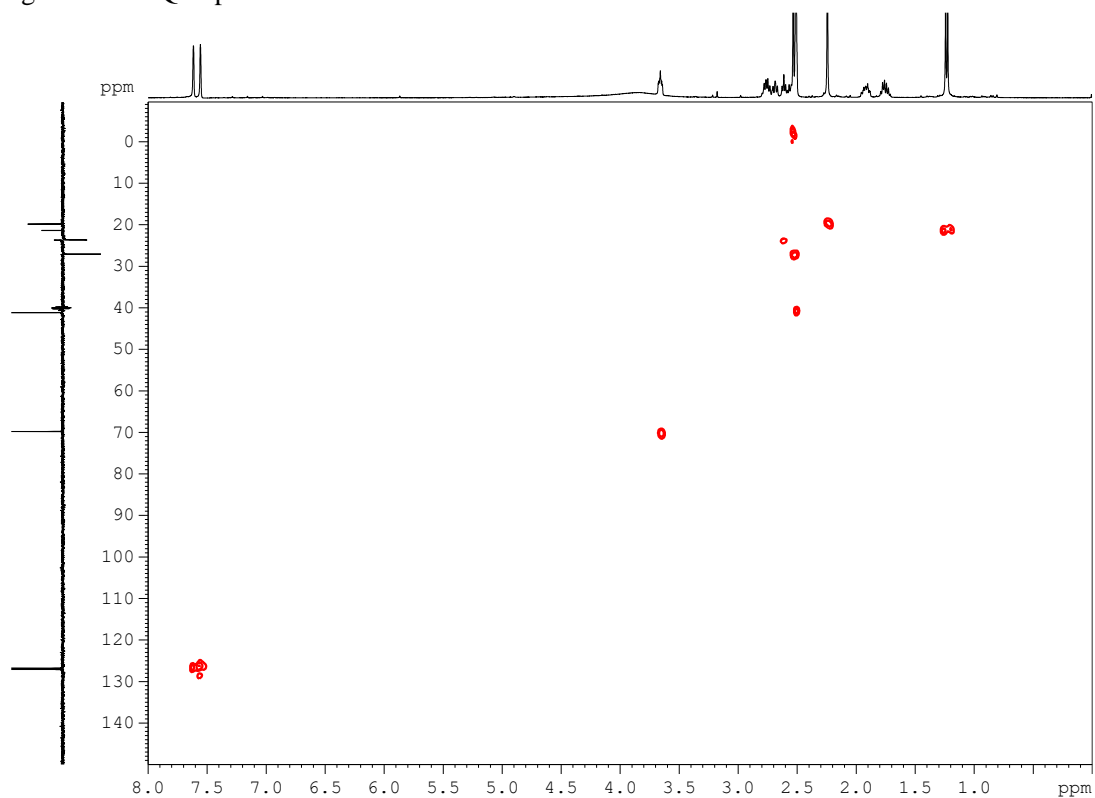

Figure S6. HMBC spectrum of **1** in DMSO-*d*<sub>6</sub>

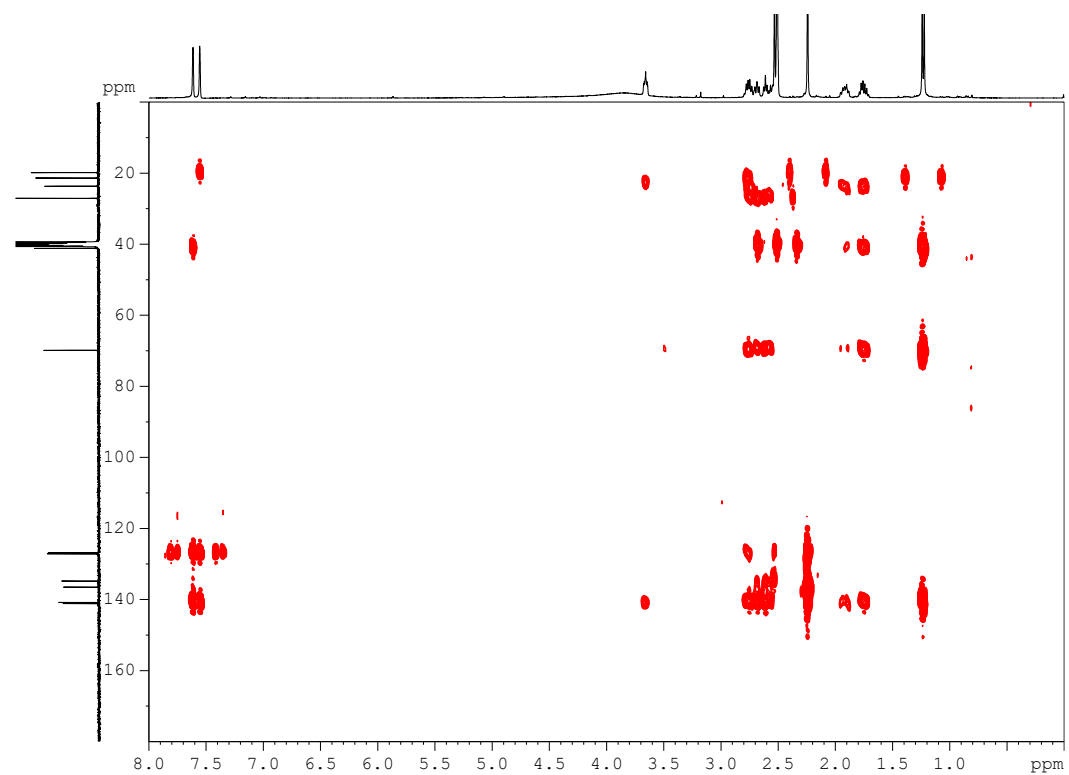

Figure S7. NOESY spectrum of **1** in DMSO-*d*<sub>6</sub>

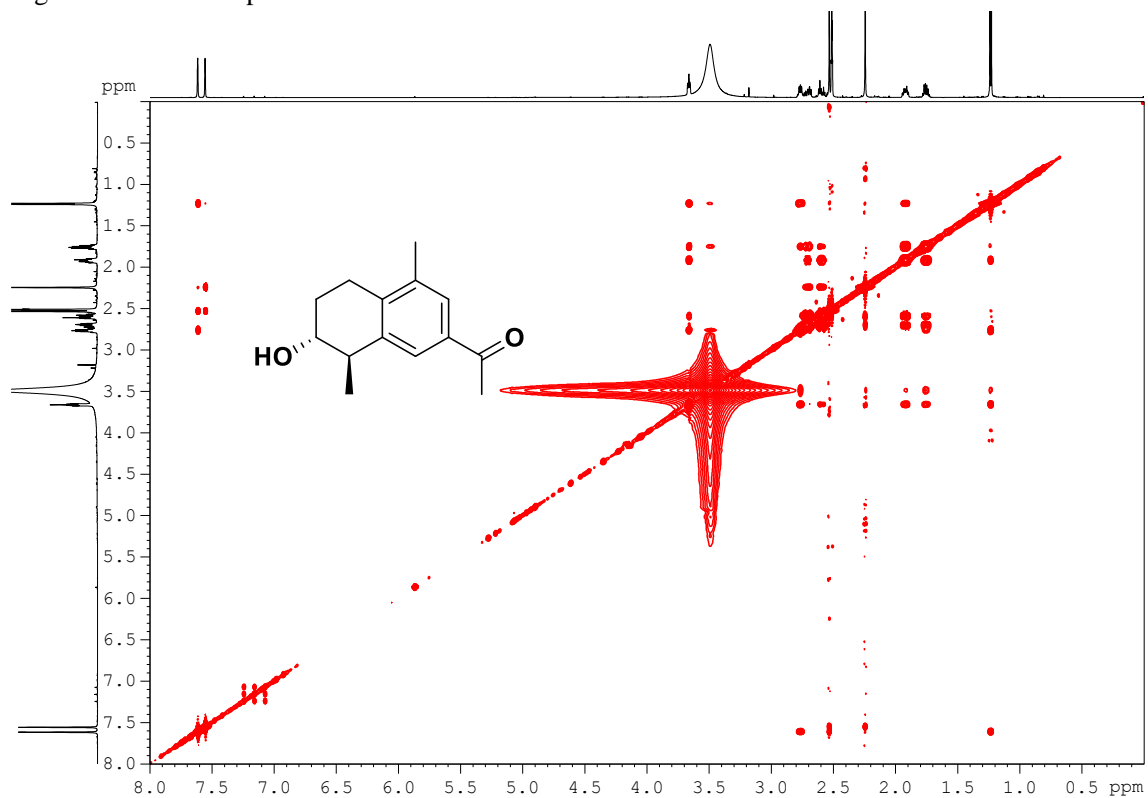

Figure S8. HRESIMS spectrum of **1**

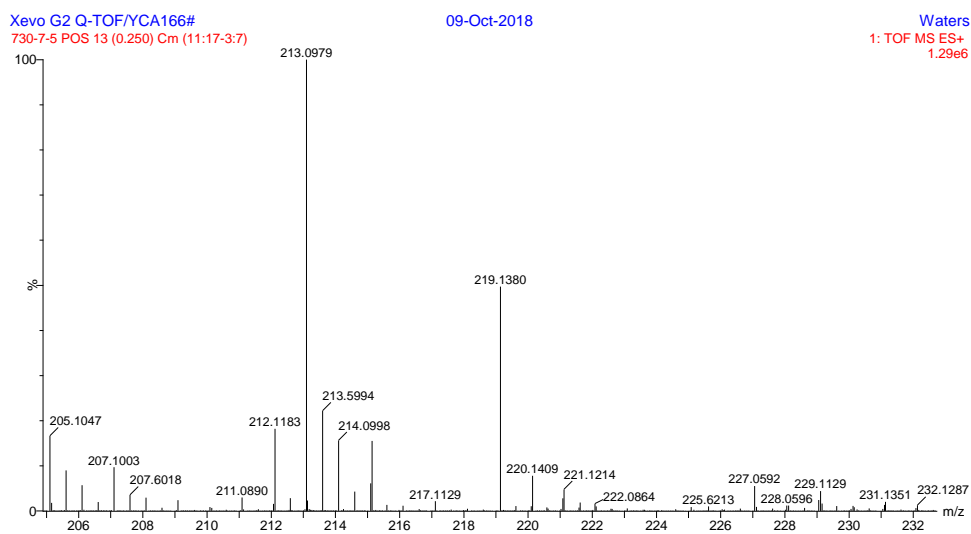

| Mass     | Calc. Mass | mDa  | PPM  | DBE | i-FIT | Norm | Conf(%) | Formula                                        |
|----------|------------|------|------|-----|-------|------|---------|------------------------------------------------|
| 219.1380 | 219.1385   | -0.5 | -2.3 | 5.5 | 767.1 | n/a  | n/a     | C <sub>14</sub> H <sub>19</sub> O <sub>2</sub> |

Figure S9. IR spectrum of **2**

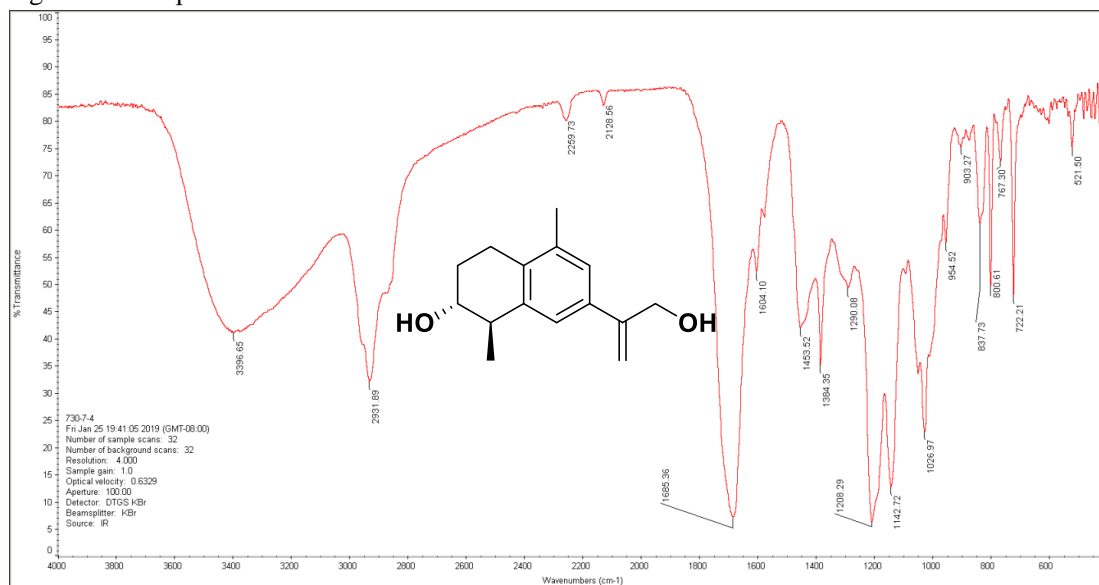

Figure S10. <sup>1</sup>H NMR (600 MHz) spectrum of **2** in DMSO-*d*<sub>6</sub>

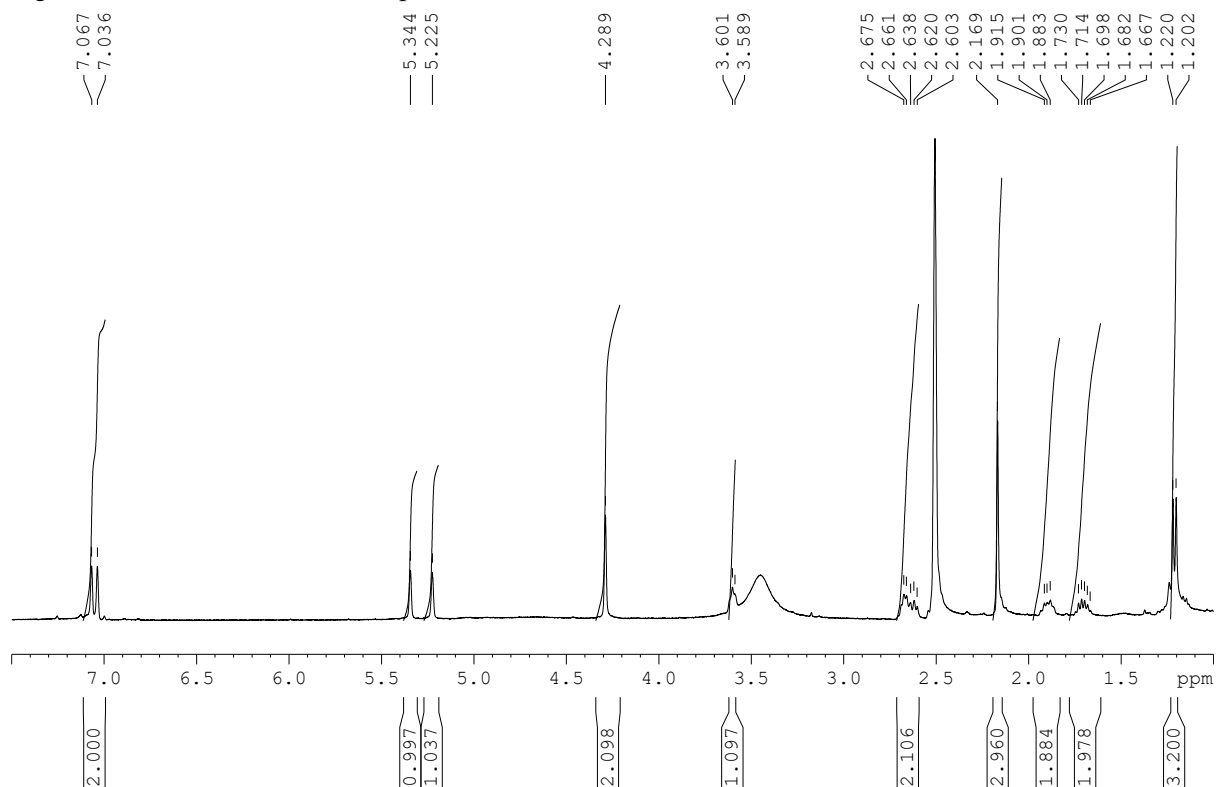

Figure S11.  $^{13}\text{C}$  NMR and DEPT (150 MHz) spectra of **2** in  $\text{DMSO-}d_6$

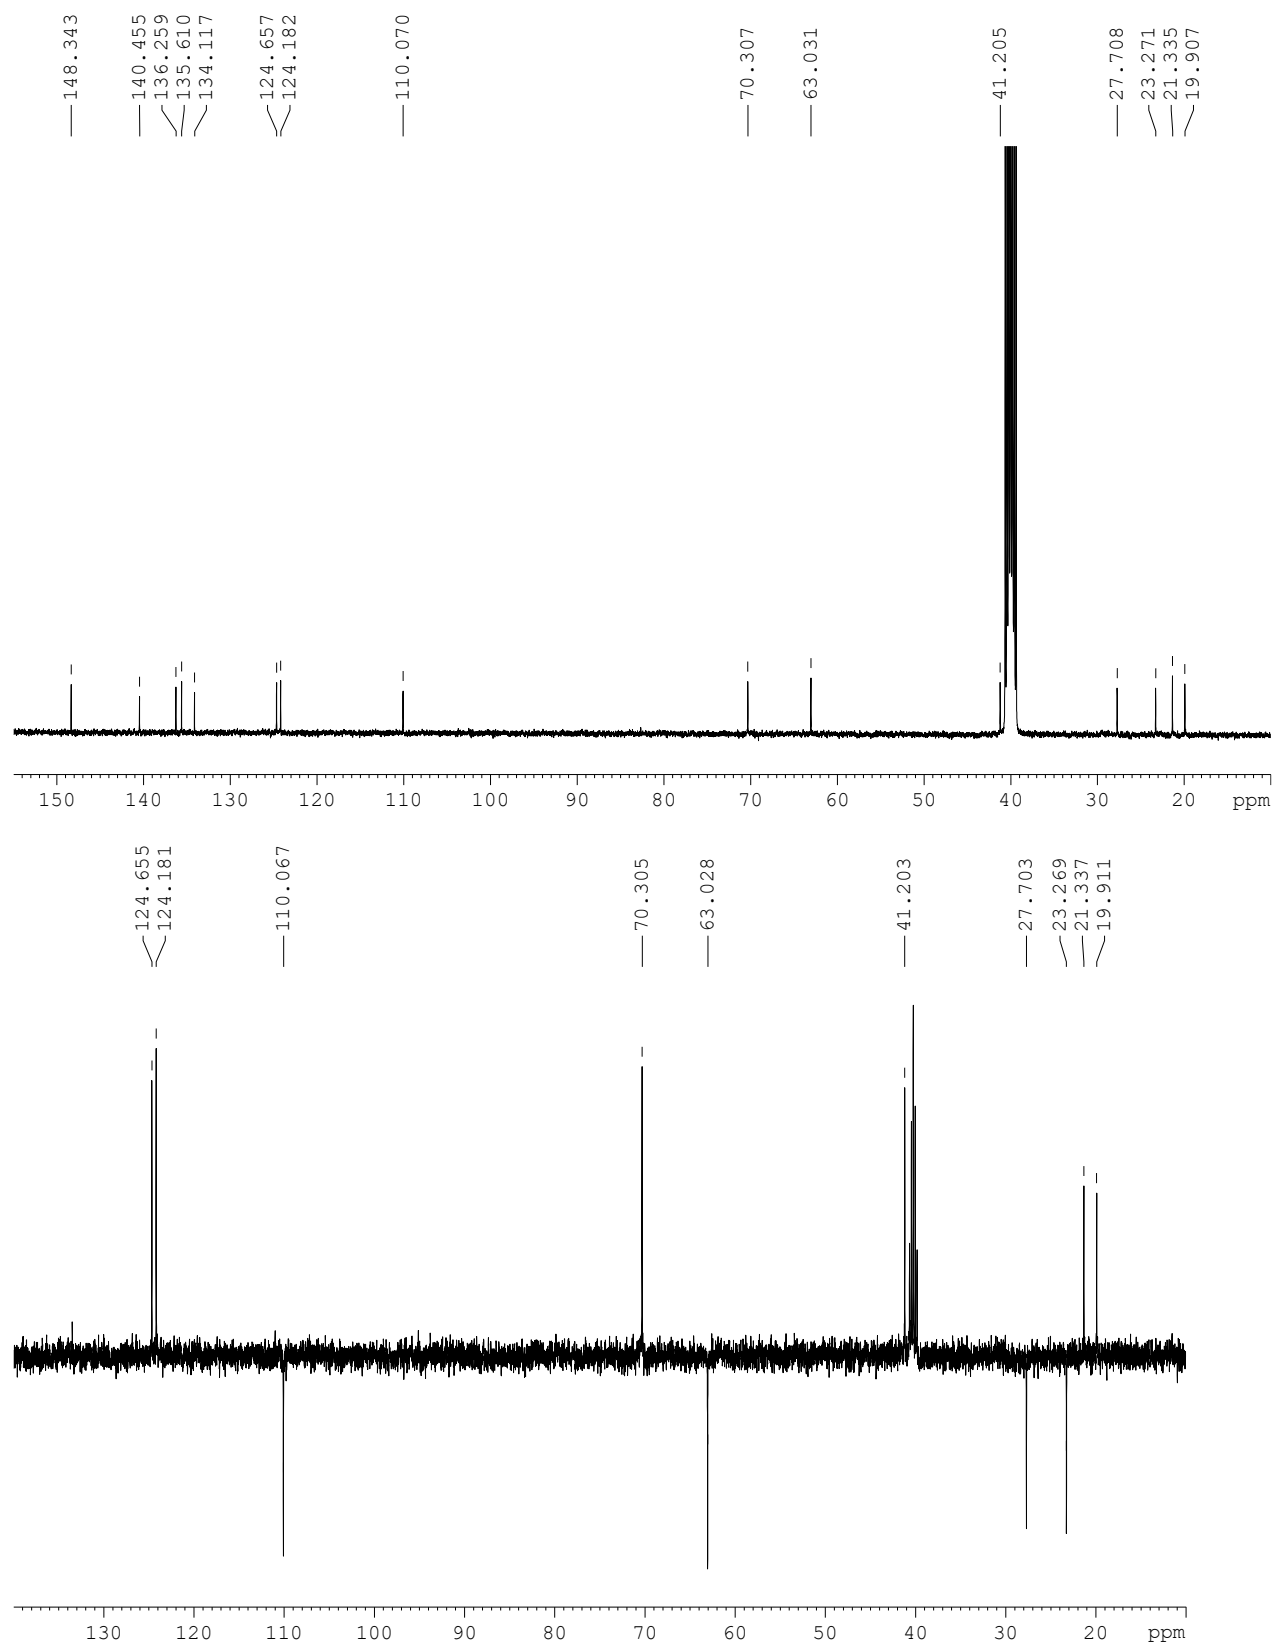

Figure S12.  $^1\text{H}$ - $^1\text{H}$  COSY spectrum of **2** in DMSO- $d_6$

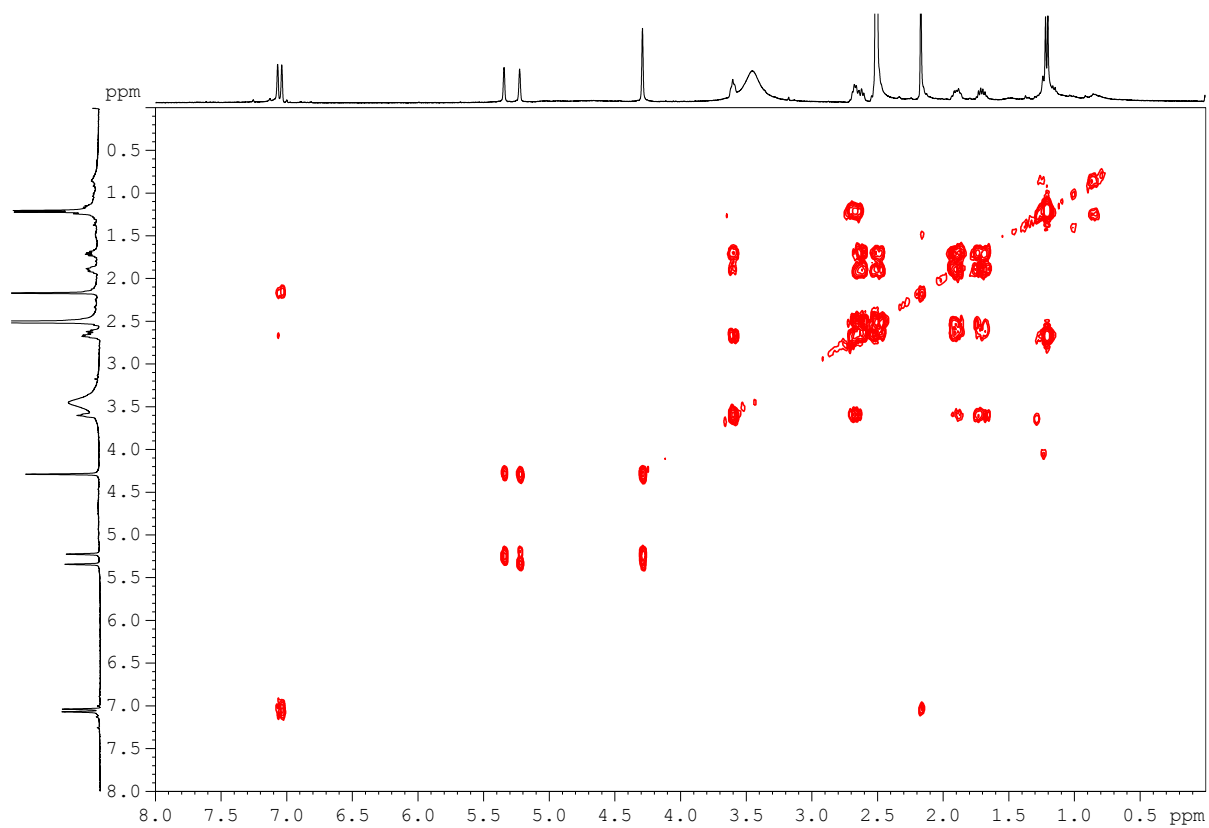

Figure S13. HSQC spectrum of **2** in DMSO- $d_6$

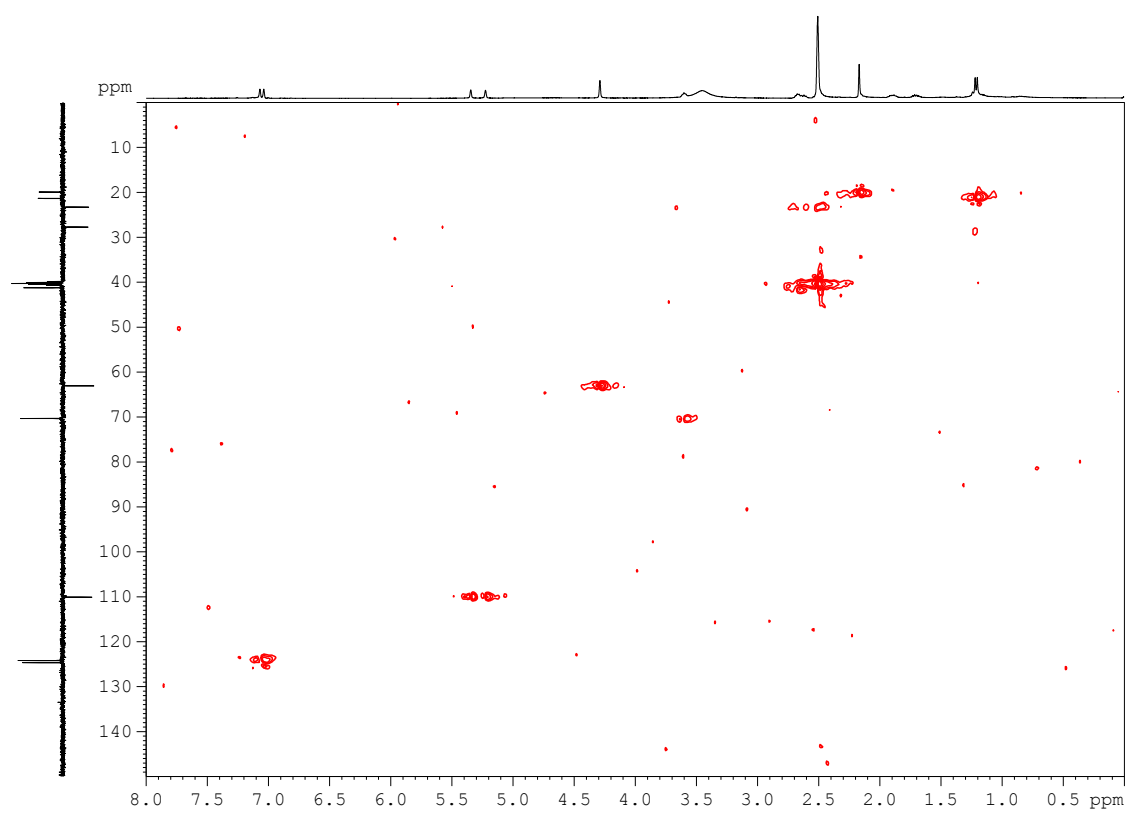

Figure S14. HMBC spectrum of **2** in DMSO-*d*<sub>6</sub>

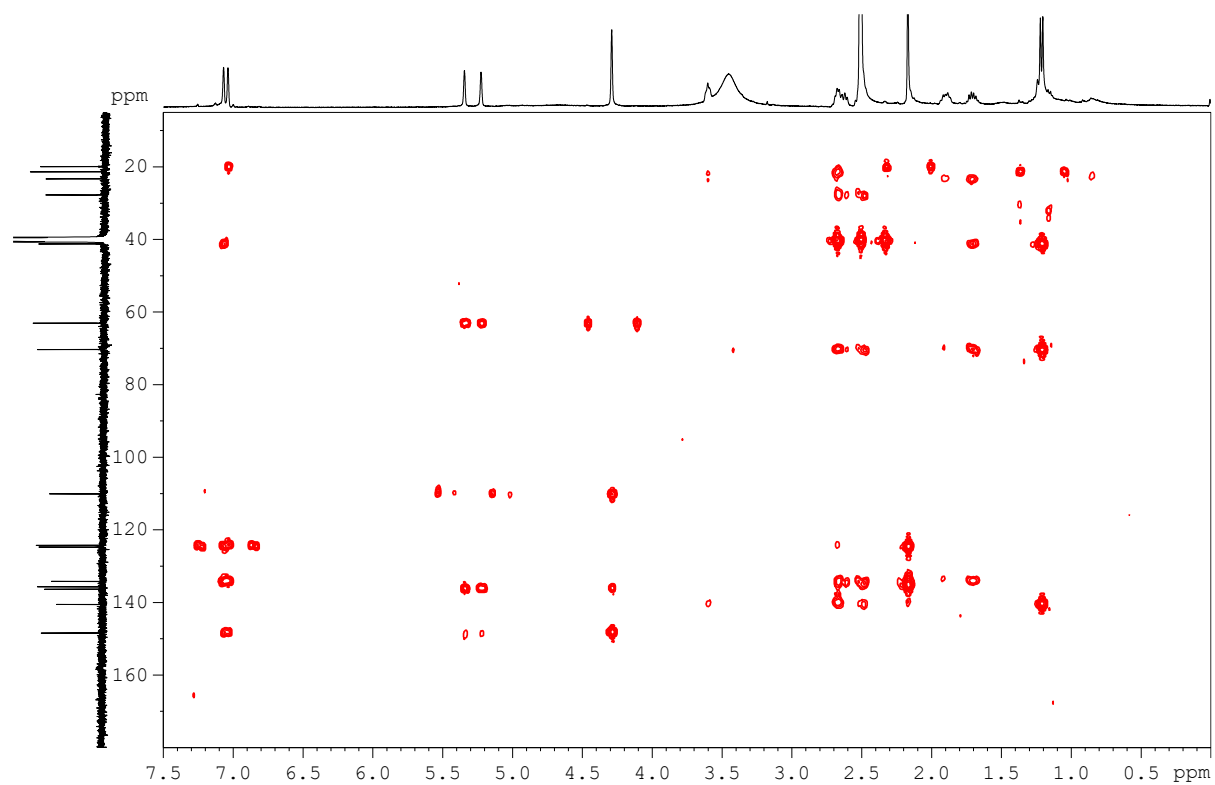

Figure S15. NOESY spectrum of **2** in DMSO-*d*<sub>6</sub>

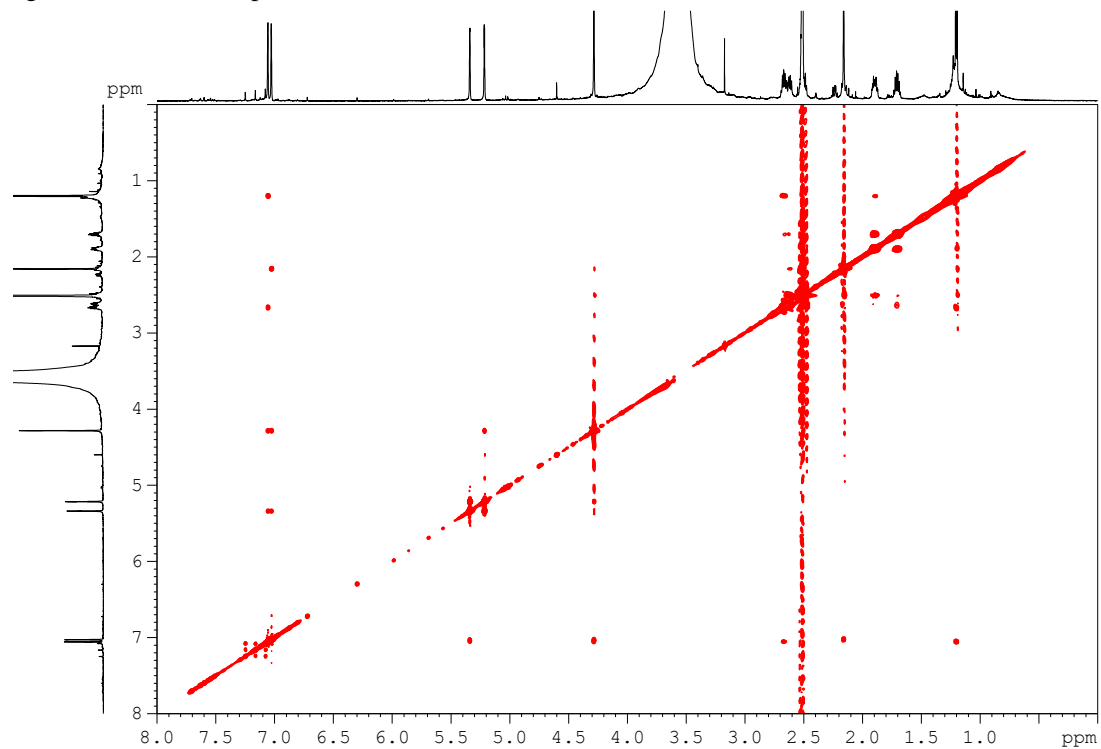

Figure S16. HRESIMS spectrum of **2**

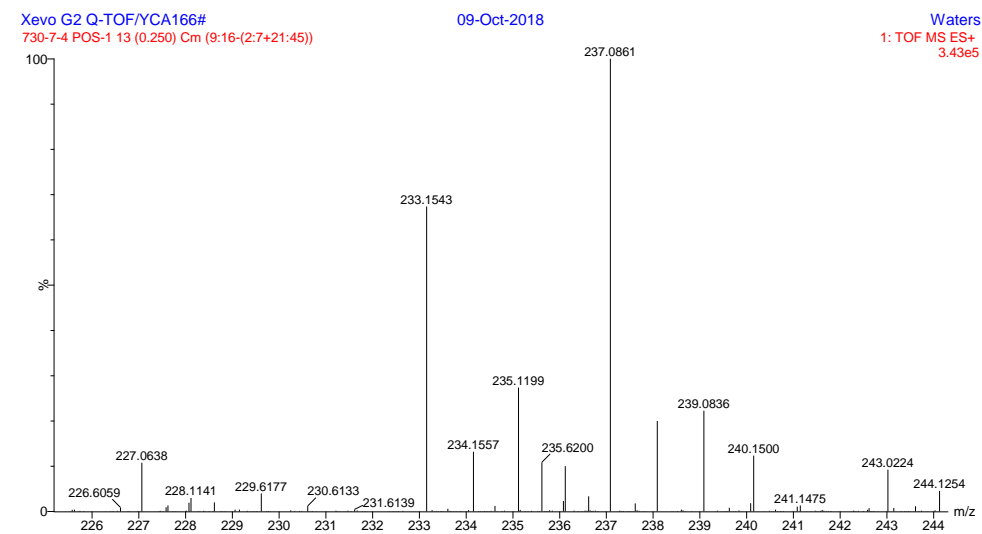

| Mass     | Calc. Mass | mDa | PPM | DBE | i-FIT | Norm | Conf(%) | Formula                                        |
|----------|------------|-----|-----|-----|-------|------|---------|------------------------------------------------|
| 233.1543 | 233.1542   | 0.1 | 0.4 | 5.5 | 430.1 | n/a  | n/a     | C <sub>15</sub> H <sub>21</sub> O <sub>2</sub> |

Figure S17. IR spectrum of **3**

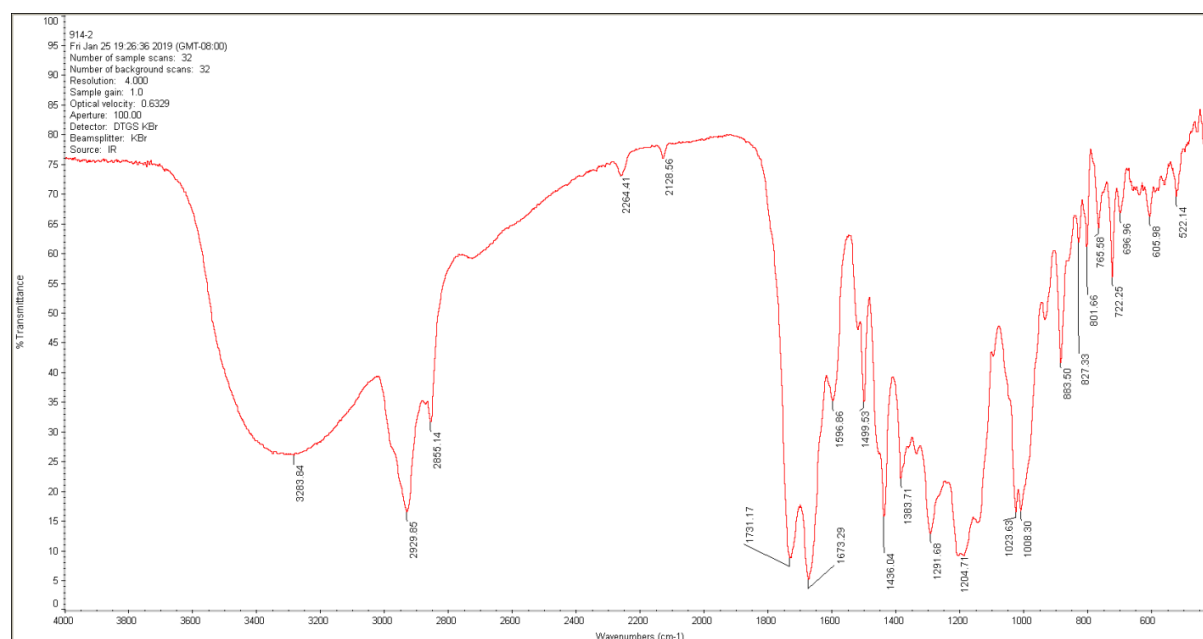



Figure S18.  $^1\text{H}$  NMR (600 MHz) spectrum of **3** in  $\text{DMSO}-d_6$

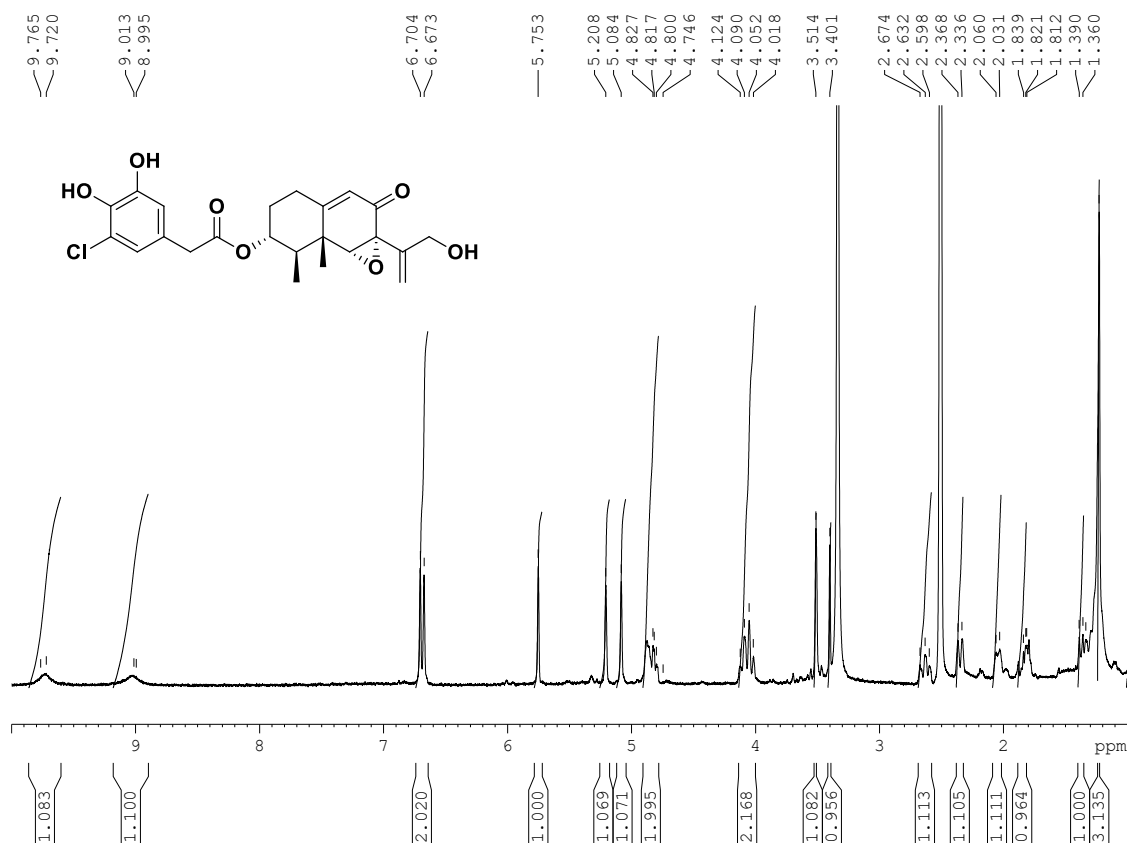

Figure S19.  $^{13}\text{C}$  NMR (150 MHz) spectrum of **3** in  $\text{DMSO}-d_6$

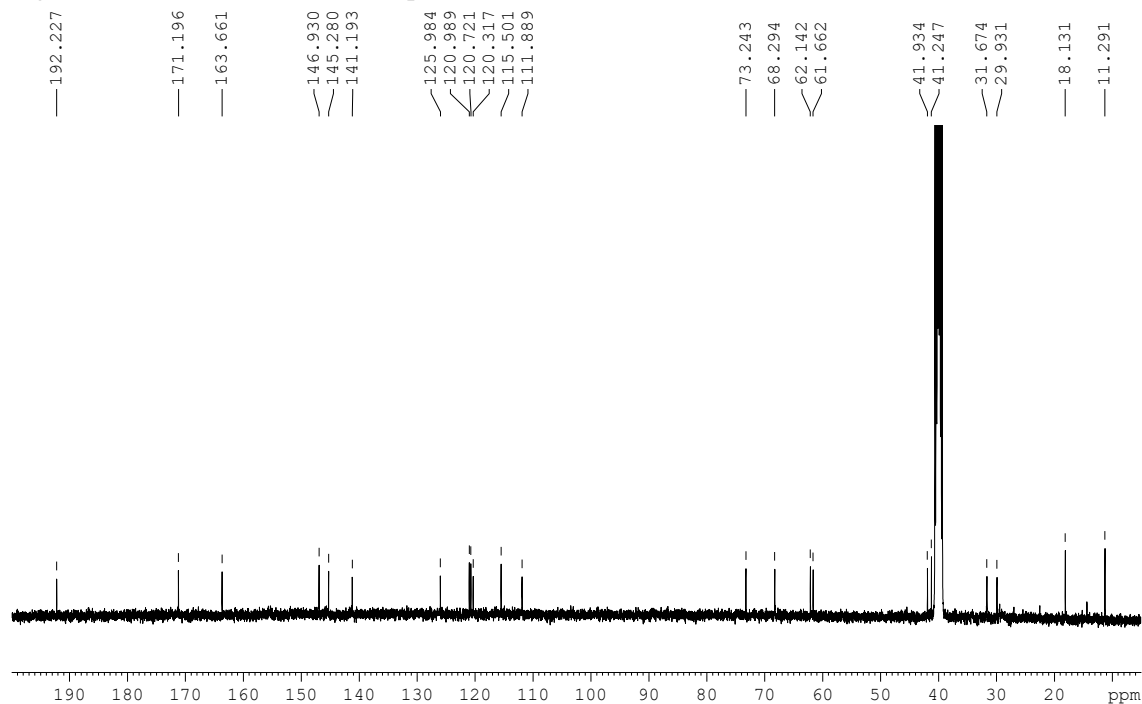

Figure S20. DEPT spectrum of **3** in DMSO-*d*<sub>6</sub>

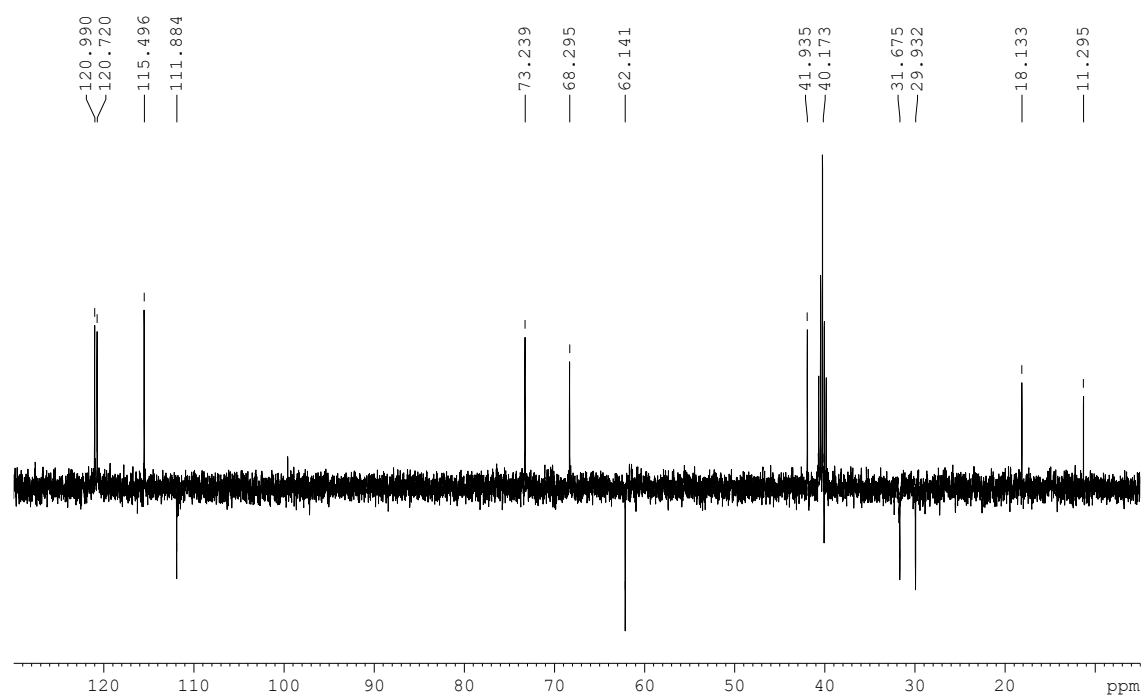

Figure S21. <sup>1</sup>H-<sup>1</sup>H COSY spectrum of **3** in DMSO-*d*<sub>6</sub>

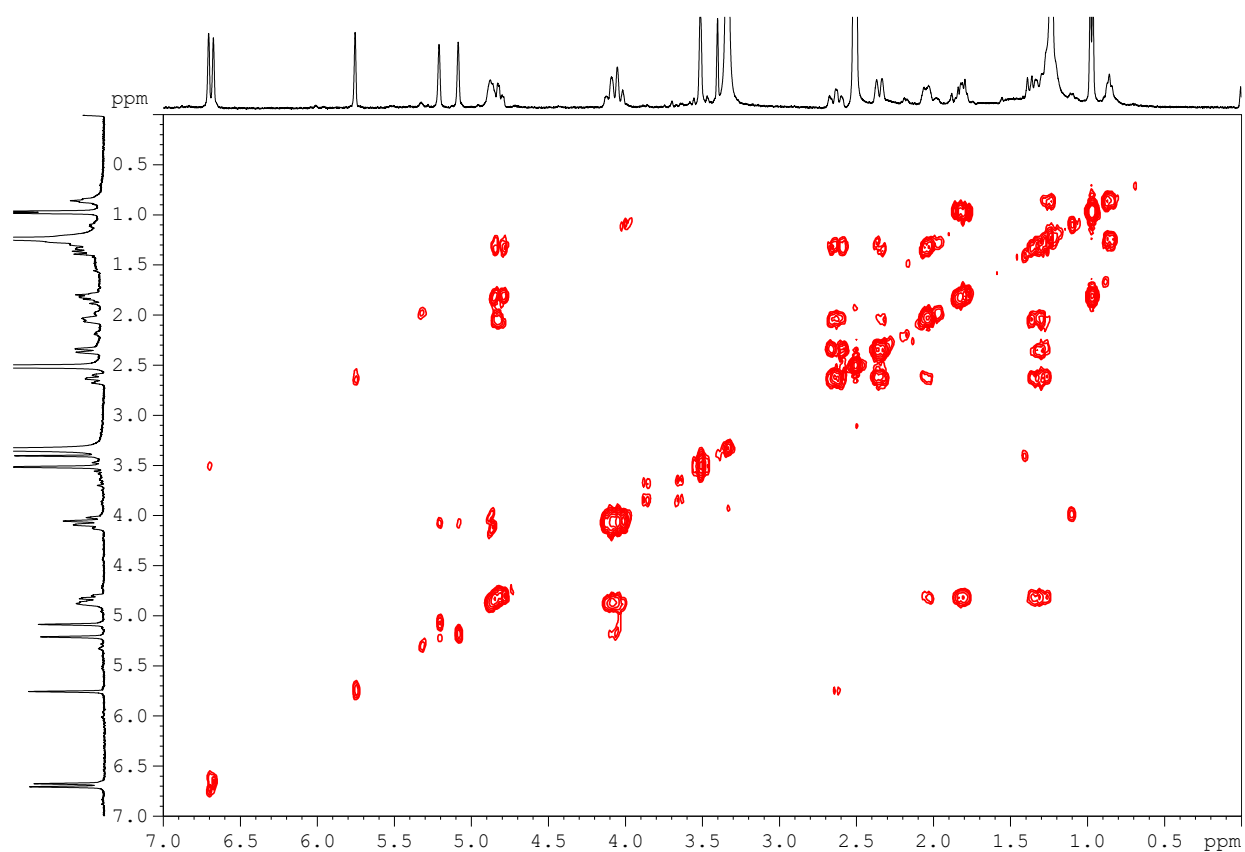

Figure S22. HSQC spectrum of **3** in DMSO-*d*<sub>6</sub>

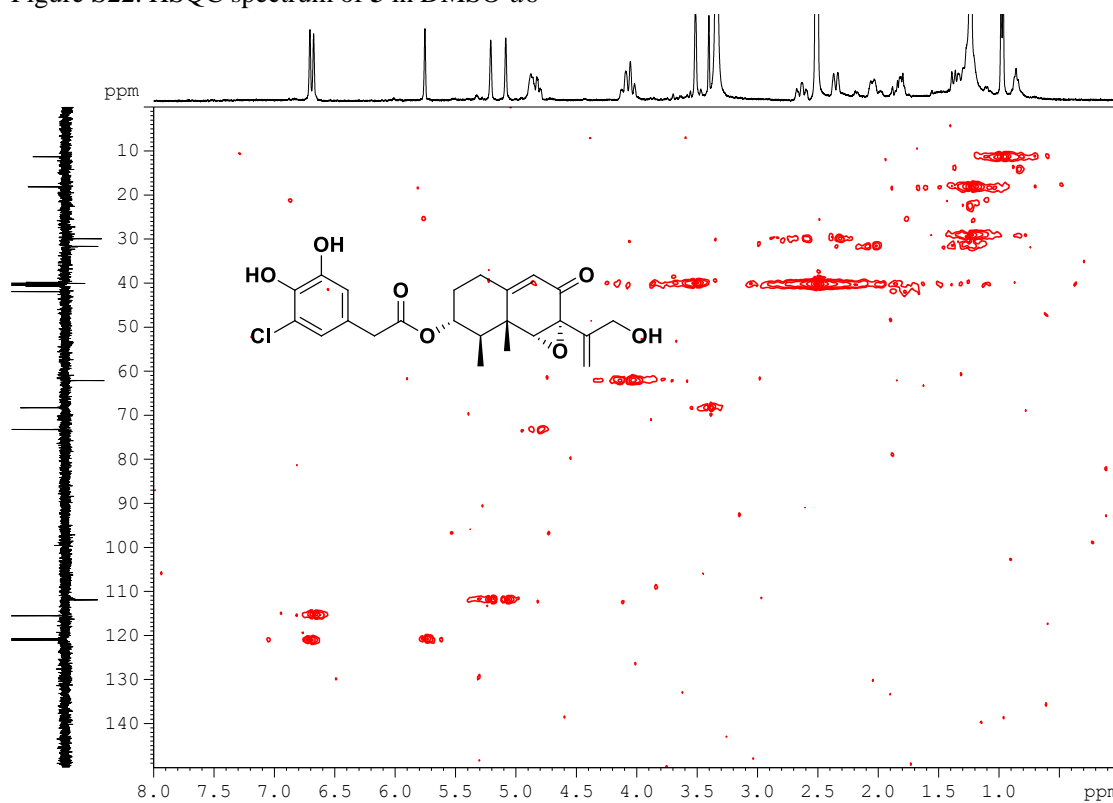

Figure S23. HMBC spectrum of **3** in DMSO-*d*<sub>6</sub>

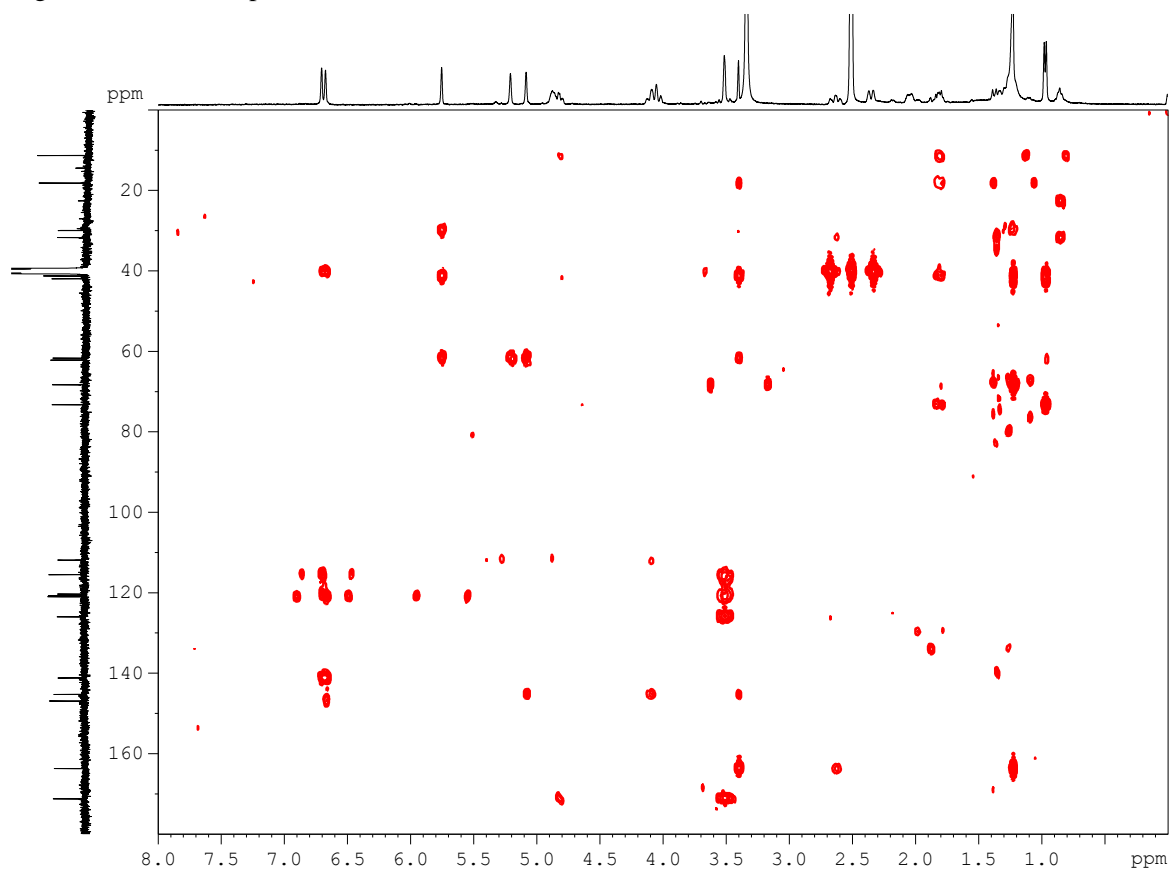

Figure S24. NOESY spectrum of **3** in DMSO-*d*<sub>6</sub>

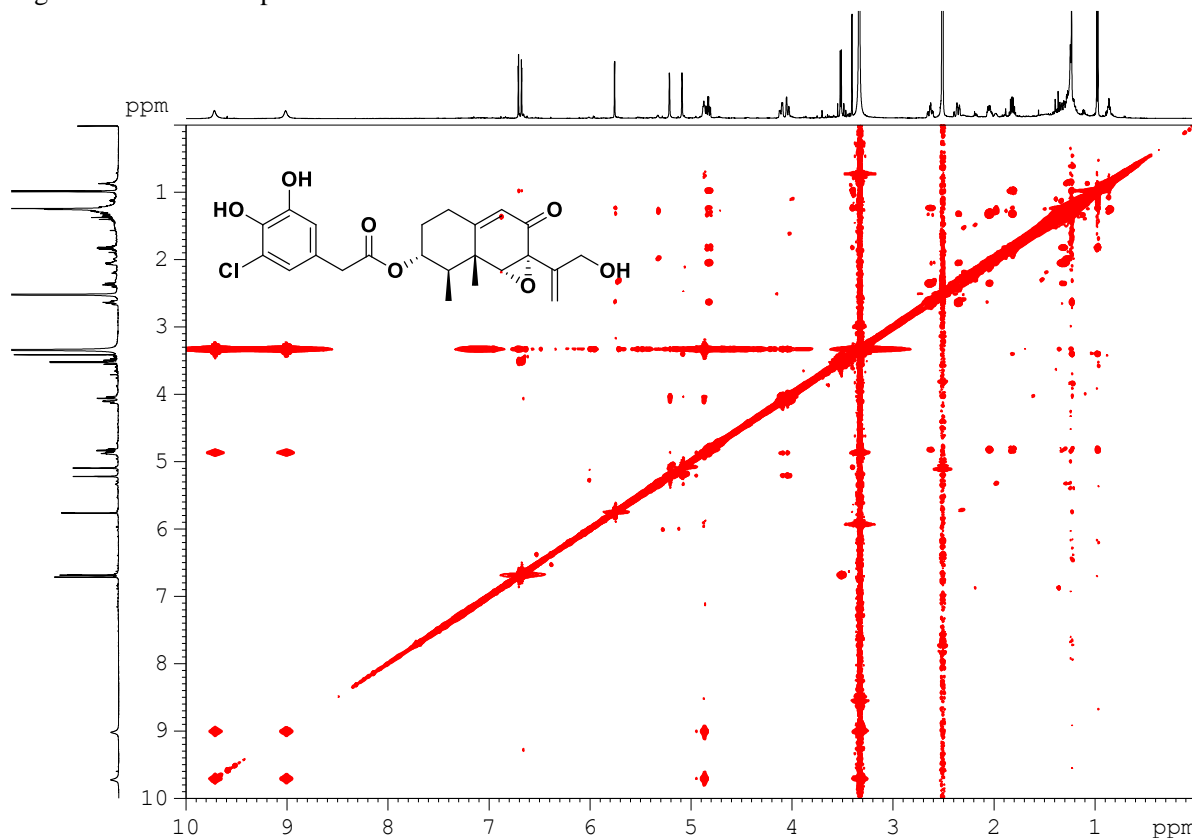

Figure S25. HRESIMS spectrum of **3**

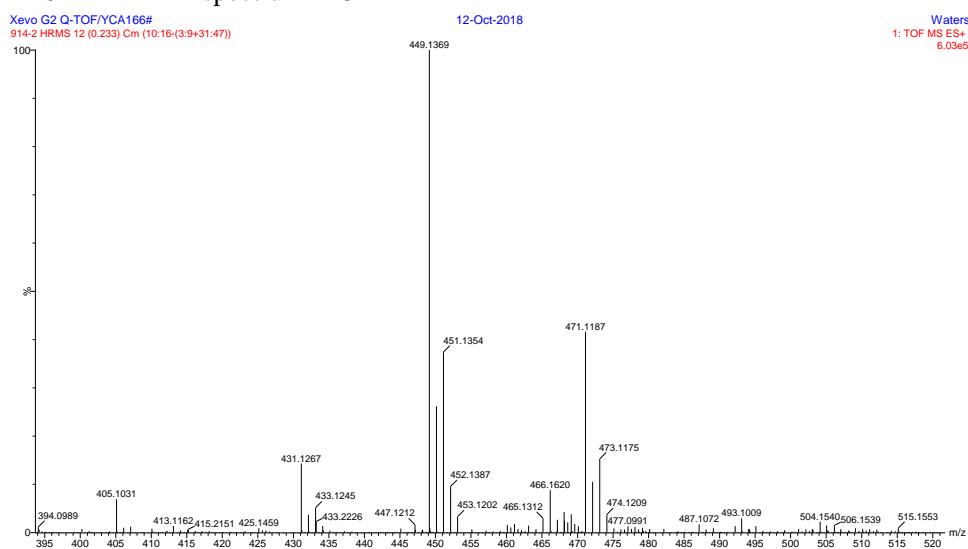

| Mass     | Calc. Mass | mDa | PPM | DBE | i-FIT | Norm  | Conf(%) | Formula                                           |
|----------|------------|-----|-----|-----|-------|-------|---------|---------------------------------------------------|
| 449.1369 | 449.1367   | 0.2 | 0.4 | 2.5 | 278.2 | 0.023 | 97.68   | C <sub>23</sub> H <sub>26</sub> O <sub>7</sub> Cl |

10-3-7  
 Fri Jan 25 20:47:49 2019 (GMT-08:00)  
 Number of sample scans: 32  
 Number of background scans: 32  
 Resolution: 4.000  
 Sample gain: 1.0  
 Optical velocity: 0.6329  
 Aperture: 100.00  
 Detector: DTGS KBr  
 Beamsplitter: KBr  
 Source: IR

| Wavenumber (cm⁻¹) |
|-------------------|
| 3260.84           |
| 2941.98           |
| 2297.38           |
| 2128.56           |
| 1732.28           |
| 1670.29           |
| 1596.65           |
| 1521.78           |
| 1500.08           |
| 1435.37           |
| 1359.21           |
| 1291.67           |
| 1205.35           |
| 1025.33           |
| 1000.54           |
| 881.35            |
| 827.76            |
| 801.16            |
| 765.09            |
| 721.79            |
| 699.42            |
| 608.10            |
| 524.74            |

Chemical structure of compound 10 is shown above the spectrum. The structure is a complex polycyclic molecule with a hydroxyl group, a ketone, and a chlorophenyl group.

<sup>1</sup>H NMR spectrum (CDCl<sub>3</sub>) of compound 10. The x-axis represents the chemical shift in ppm, ranging from 0 to 10. The spectrum shows several peaks, with integration values provided below the baseline and chemical shift values labeled above the peaks.

Integration values (from left to right): 1.000, 1.021, 2.088, 0.996, 2.063, 2.098, 2.012, 1.018, 3.068, 3.085, 0.500, 0.504, 1.151, 1.099, 1.091, 2.094, 6.104.

Chemical shift values (from left to right): 9.741, 9.021, 6.631, 6.614, 5.702, 5.366, 5.293, 4.691, 4.661, 3.469, 3.429, 3.416, 3.378, 3.176, 2.545, 2.533, 2.509, 2.476, 2.462, 2.280, 2.244, 1.993, 1.964, 1.567, 1.551, 1.535, 1.527, 1.510, 1.493, 1.252, 1.242.

Figure S28.  $^{13}\text{C}$  NMR (150 MHz) and DEPT spectra of **4** in  $\text{DMSO-}d_6$

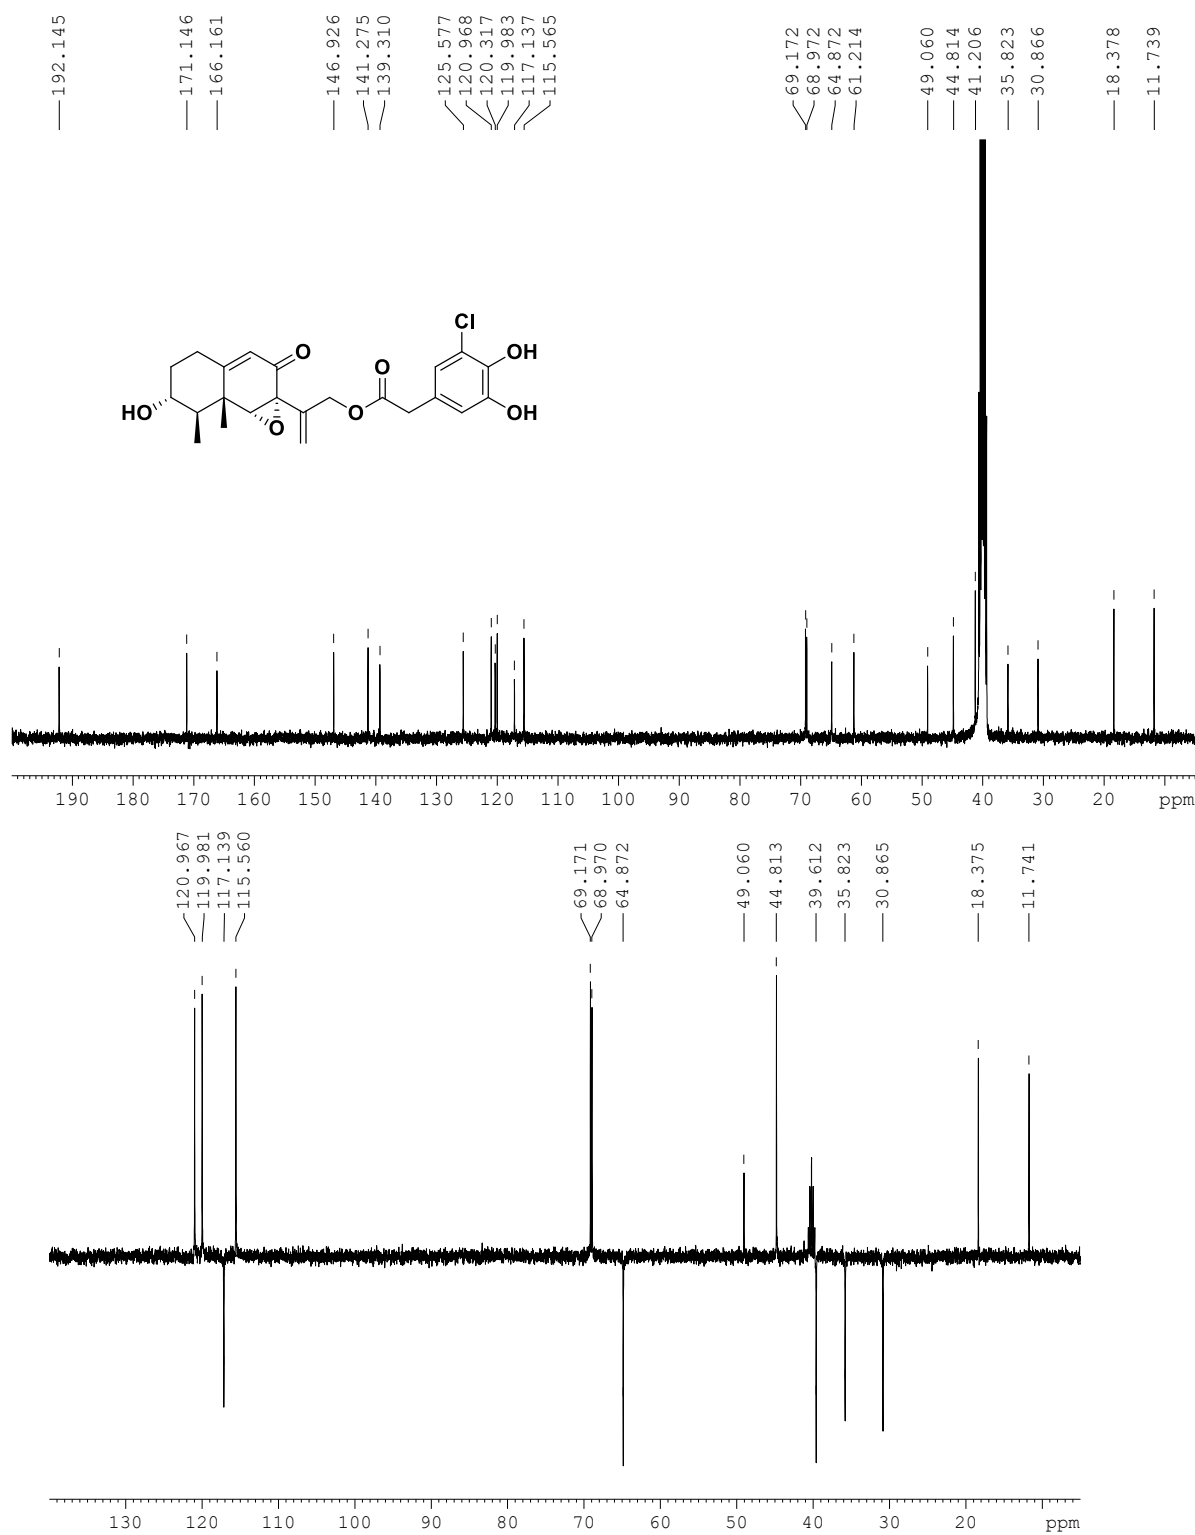

Figure S29.  $^1\text{H}$ - $^1\text{H}$  COSY spectrum of **4** in  $\text{DMSO-}d_6$

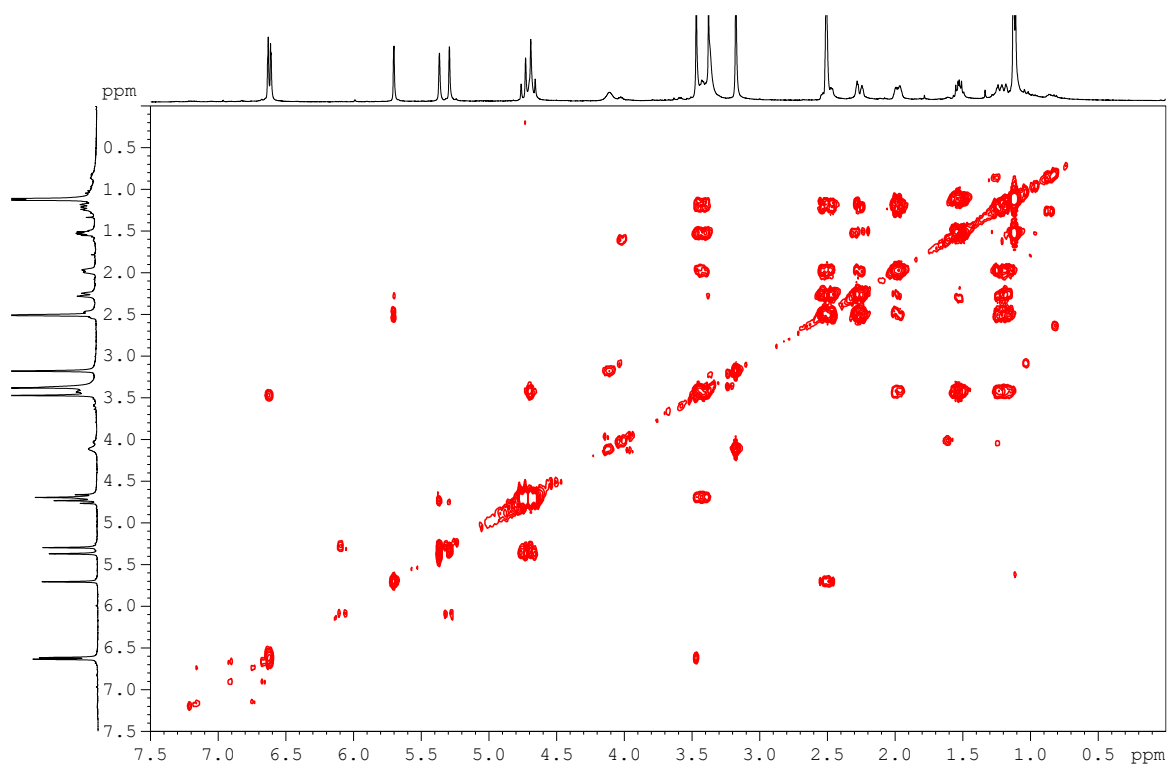

Figure S30. HSQC spectrum of **4** in  $\text{DMSO-}d_6$

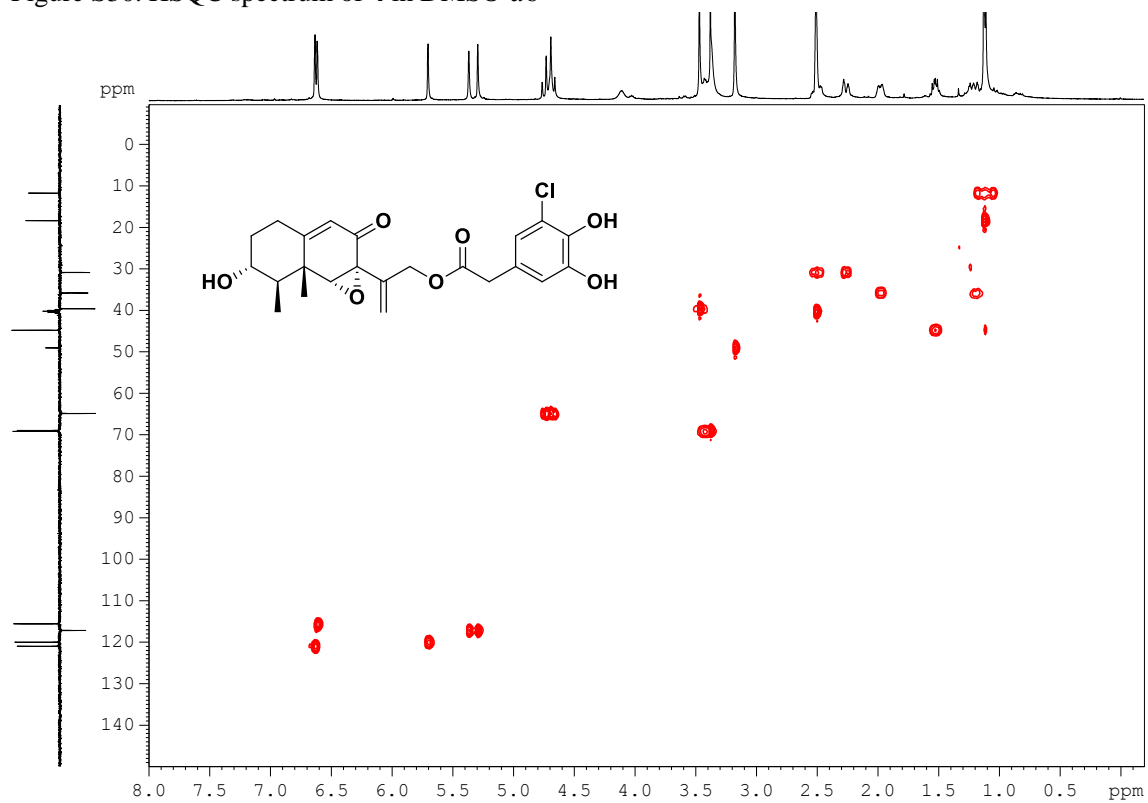

Figure S31. HMBC spectrum of **4** in DMSO-*d*<sub>6</sub>

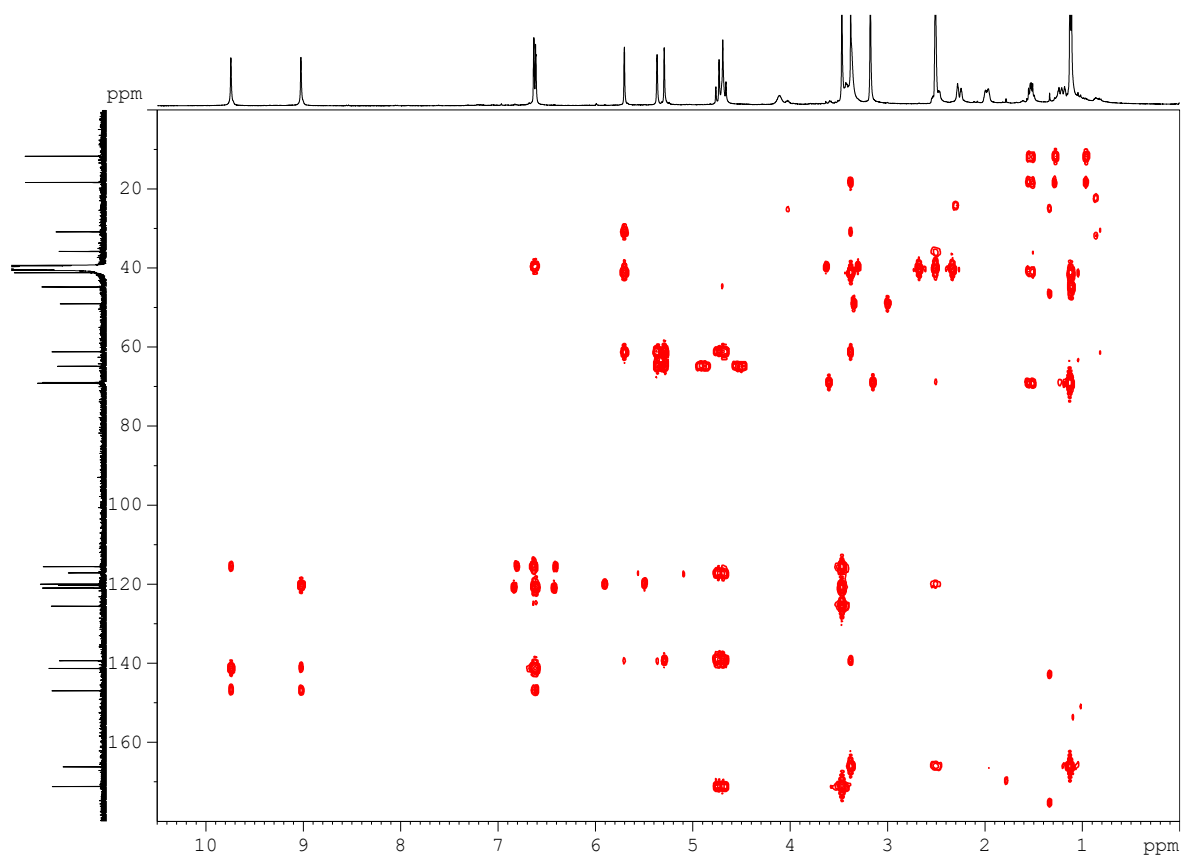

Figure S32. NOESY spectrum of **4** in DMSO-*d*<sub>6</sub>

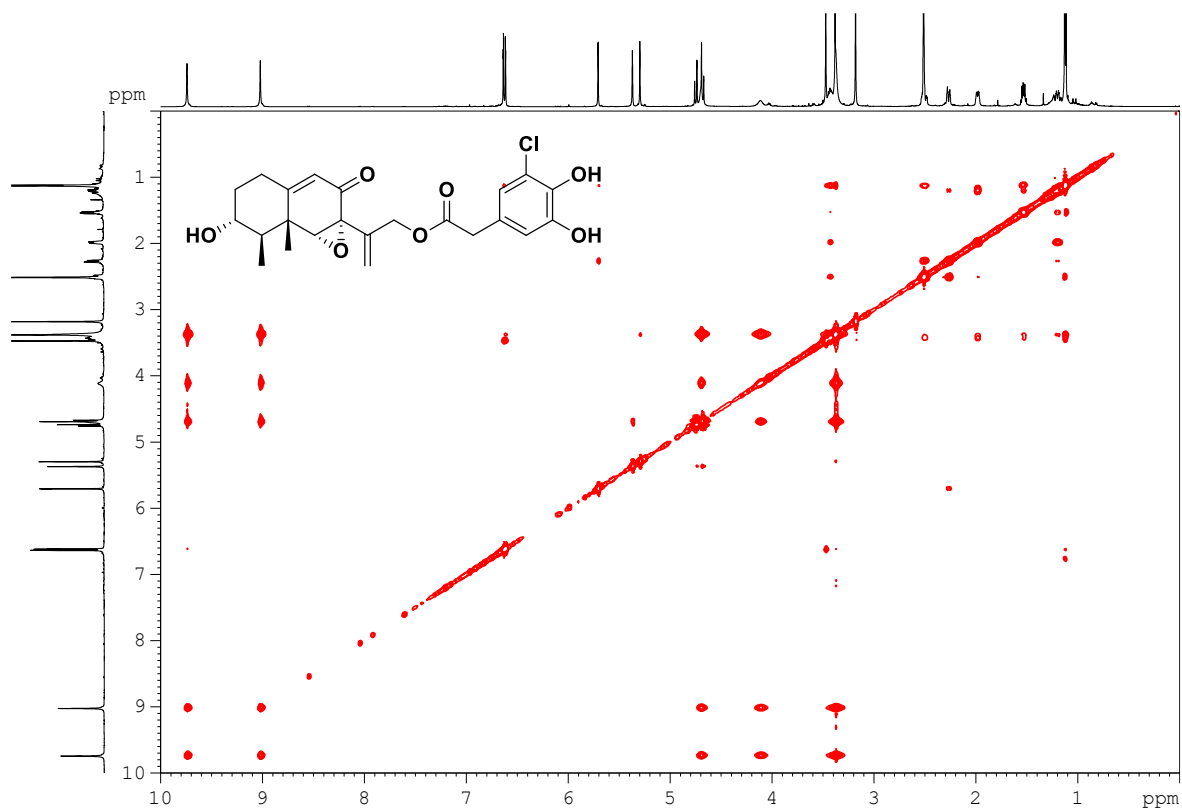



Figure S33. HRESIMS spectrum of **4**

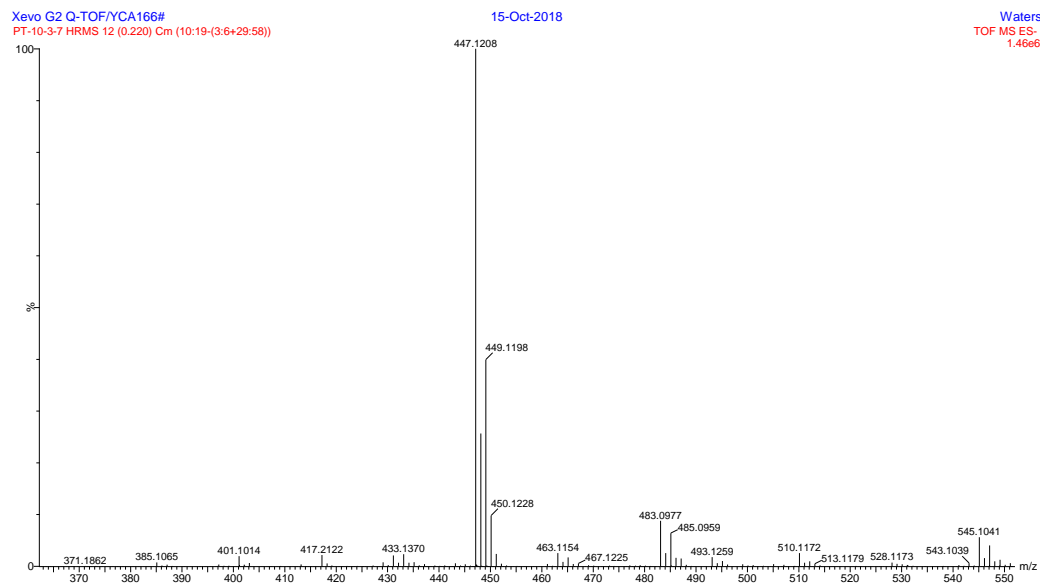

| Mass     | Calc. Mass | mDa  | PPM  | DBE  | i-FIT | Norm  | Conf(%) | Formula                                           |
|----------|------------|------|------|------|-------|-------|---------|---------------------------------------------------|
| 447.1208 | 447.1211   | -0.3 | -0.7 | 11.5 | 419.8 | 0.000 | 100.00  | C <sub>23</sub> H <sub>24</sub> O <sub>7</sub> Cl |

Figure S34. IR spectrum of **5**

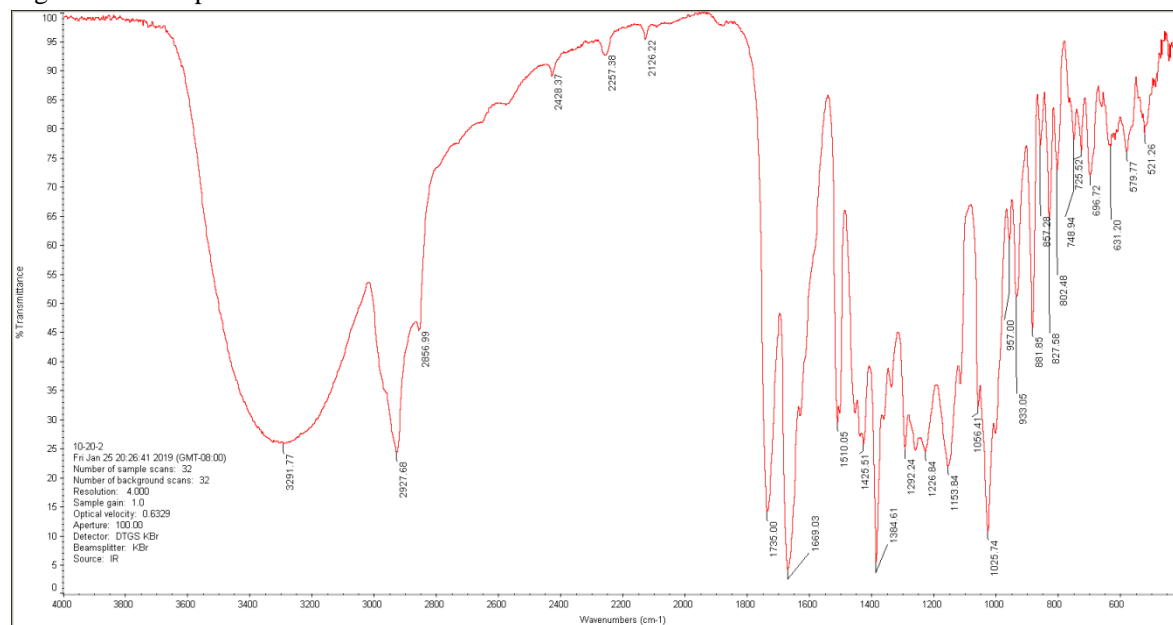

Figure S35.  $^1\text{H}$  NMR (600 MHz) spectrum of **5** in  $\text{DMSO}-d_6$

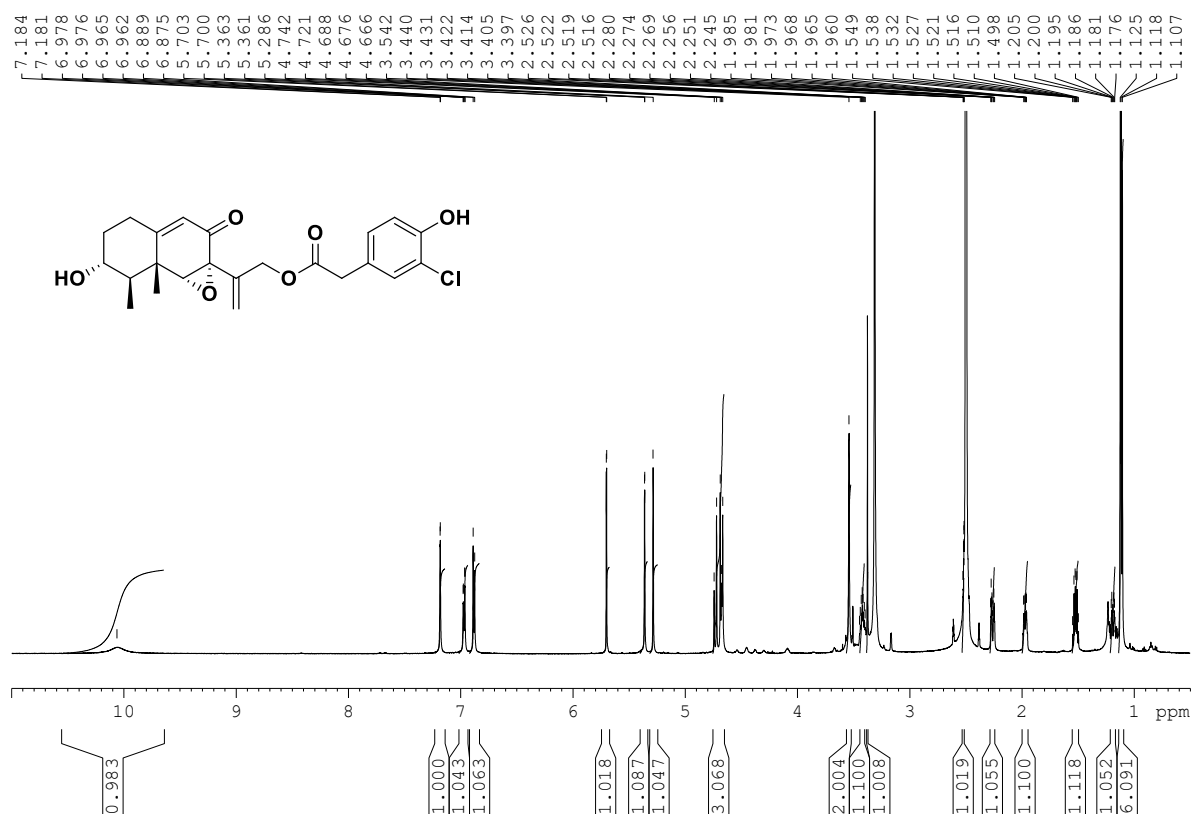

Figure S36.  $^{13}\text{C}$  NMR (150 MHz) spectrum of **5** in  $\text{DMSO}-d_6$

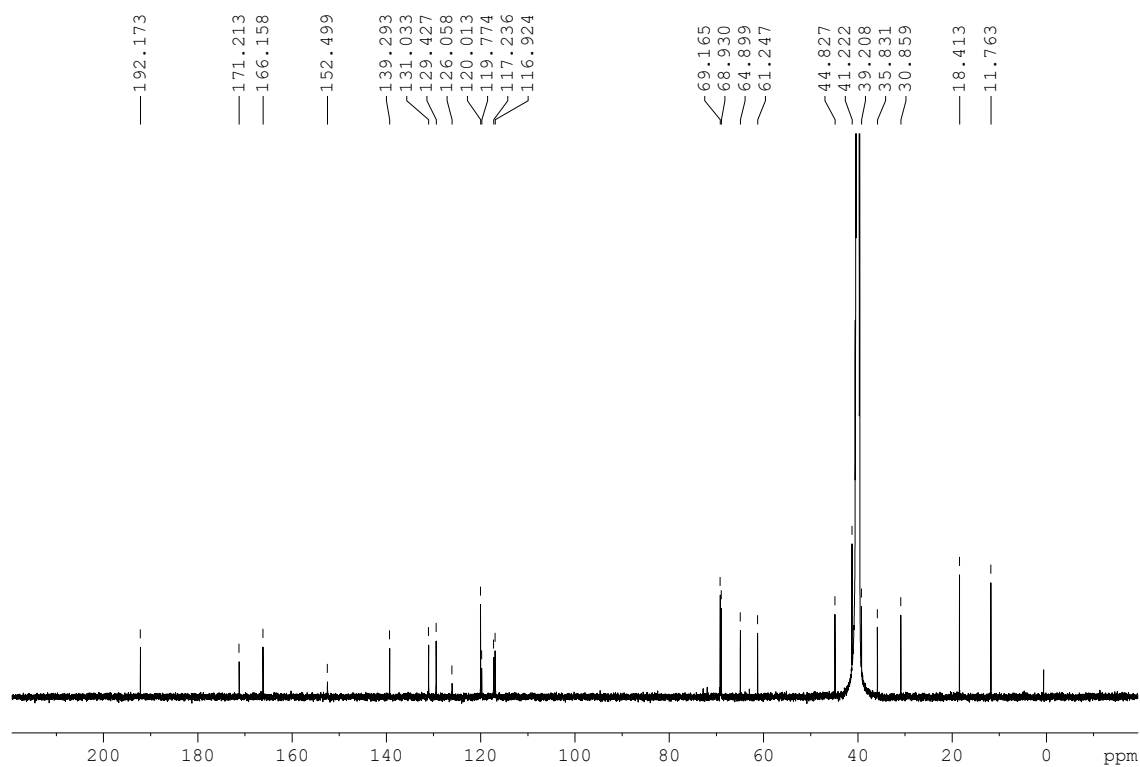

Figure S37. DEPT spectrum of **5** in DMSO-*d*<sub>6</sub>

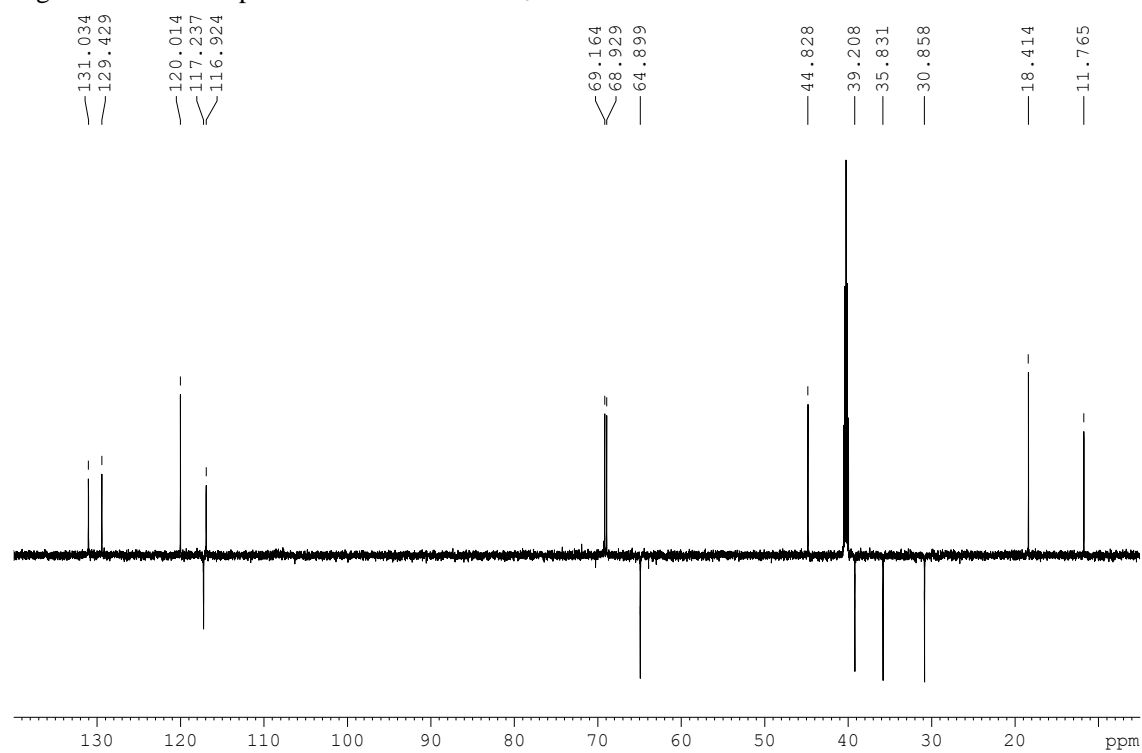

Figure S38. <sup>1</sup>H-<sup>1</sup>H COSY spectrum of **5** in DMSO-*d*<sub>6</sub>

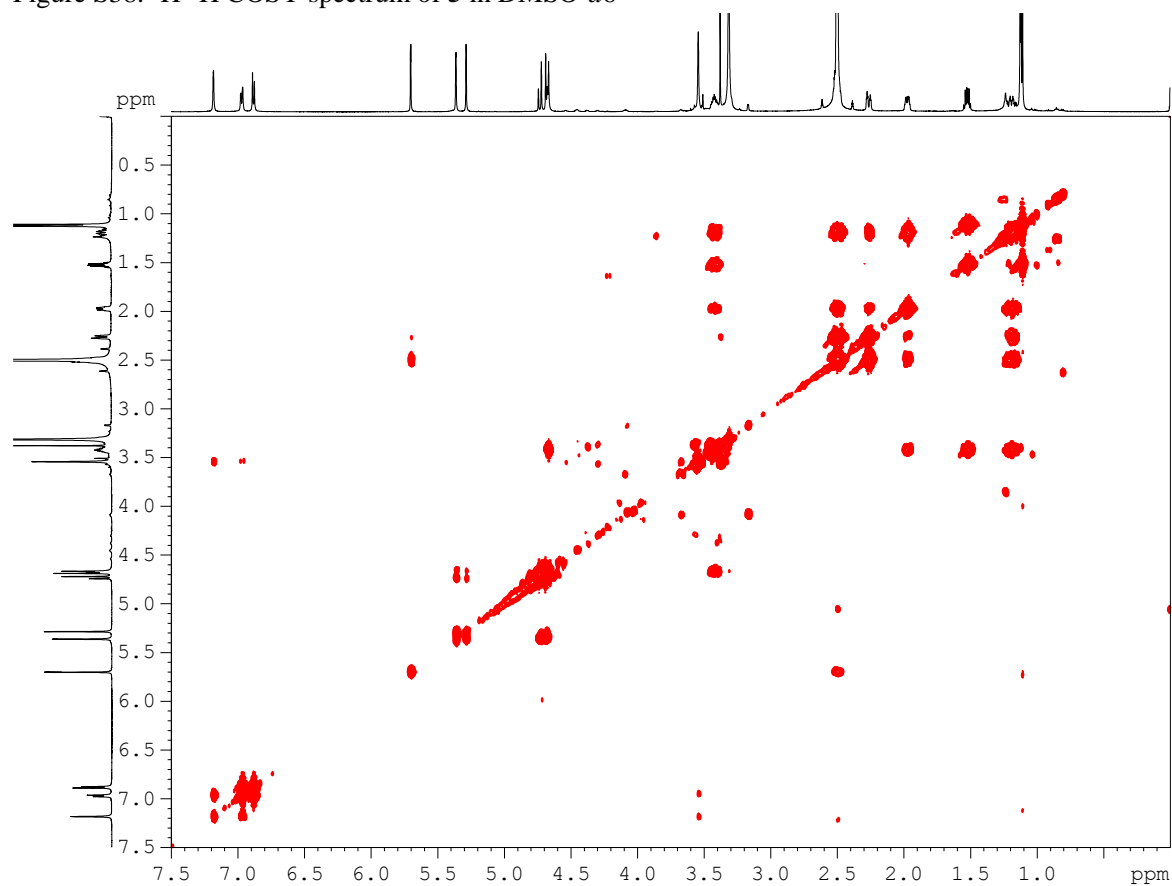

Figure S39. HSQC spectrum of **5** in DMSO-*d*<sub>6</sub>

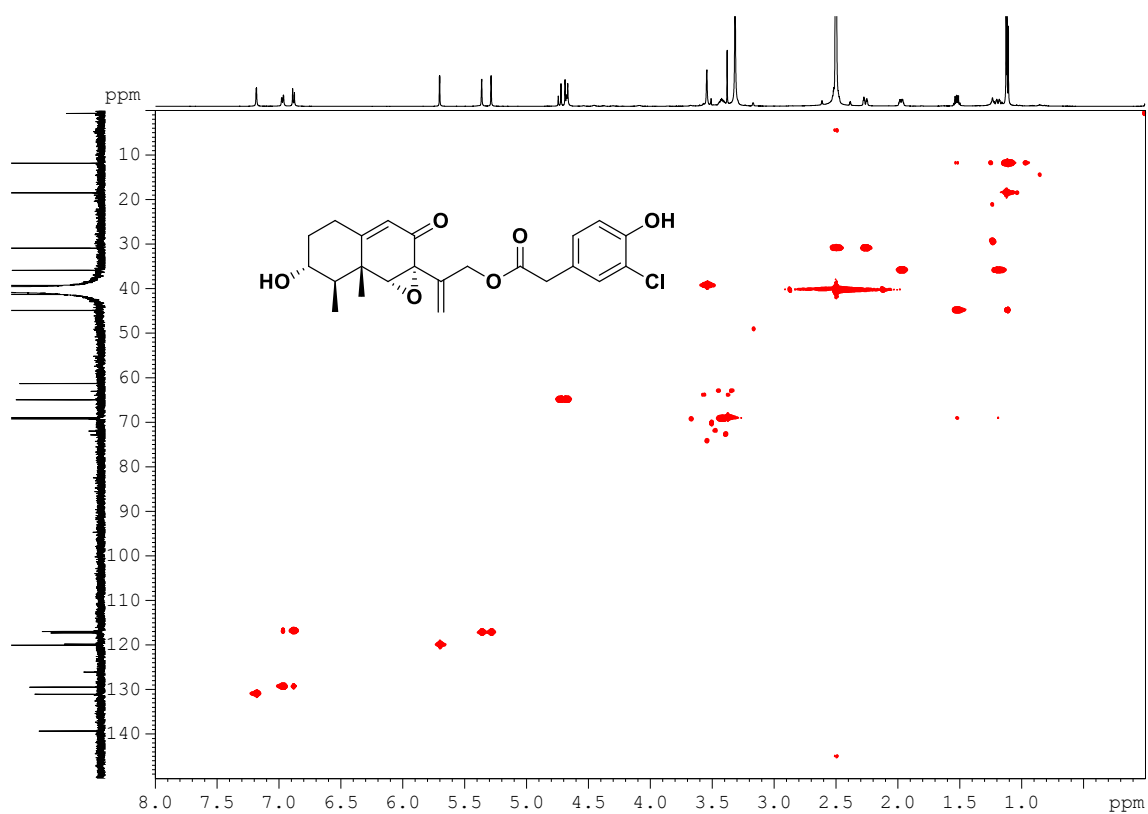

Figure S40. HMBC spectrum of **5** in DMSO-*d*<sub>6</sub>

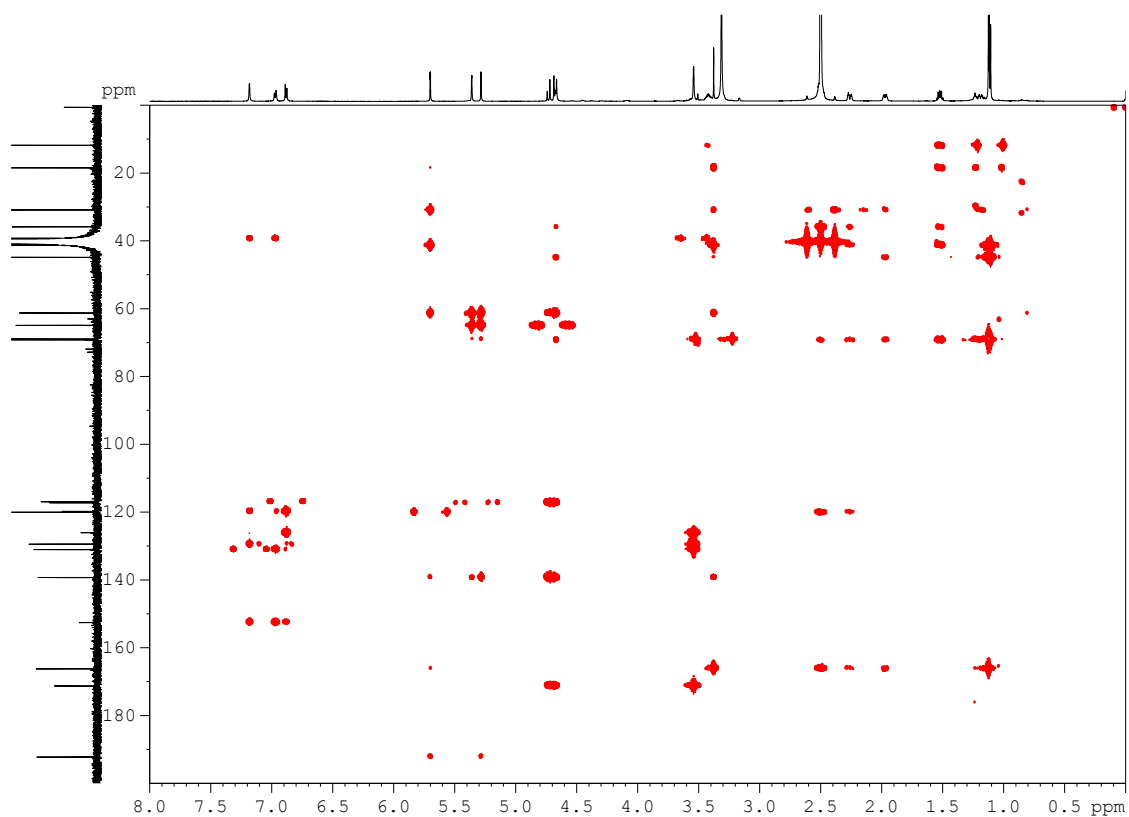

Figure S41. NOESY spectrum of **5** in DMSO-*d*<sub>6</sub>

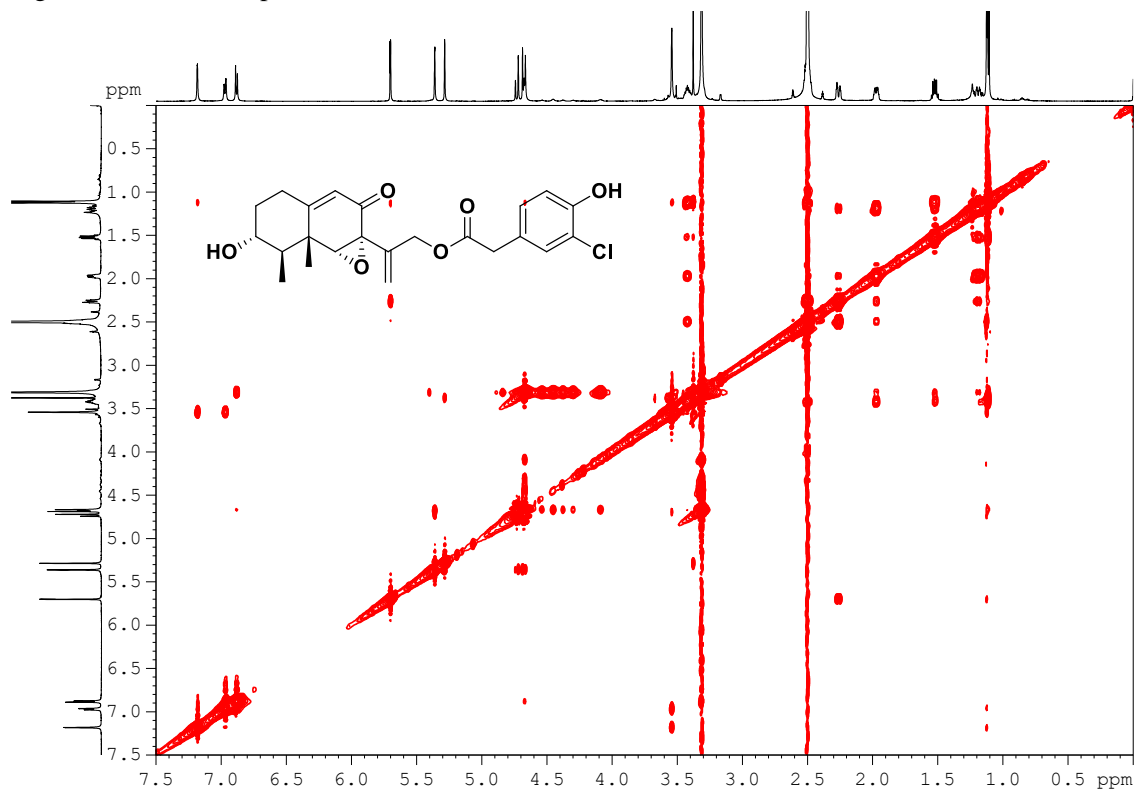

Figure S42. HRESIMS spectrum of **5**

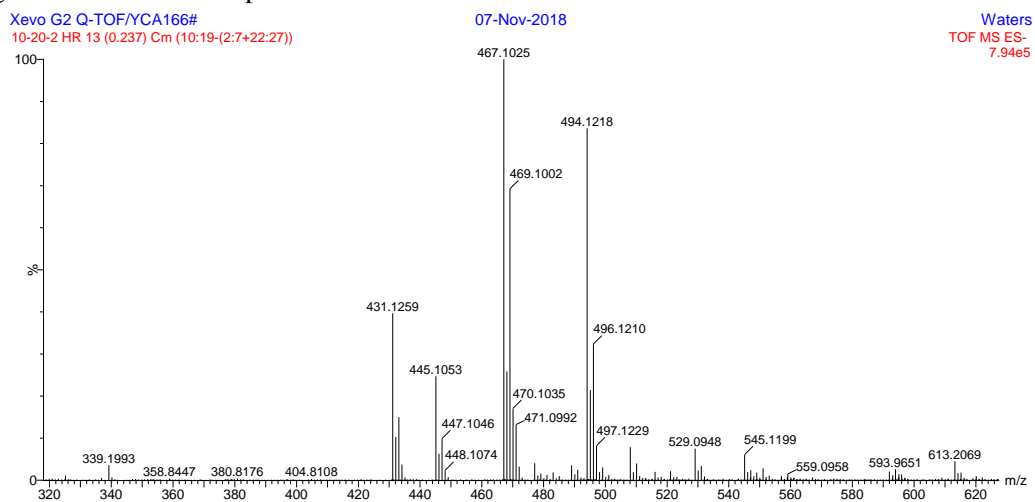

| Mass     | Calc. Mass | mDa  | PPM  | DBE  | i-FIT | Norm  | Conf(%) | Formula                                           |
|----------|------------|------|------|------|-------|-------|---------|---------------------------------------------------|
| 431.1259 | 431.1261   | -0.2 | -0.5 | 11.5 | 369.5 | 0.000 | 100.00  | C <sub>23</sub> H <sub>24</sub> O <sub>6</sub> Cl |

Figure S43. IR spectrum of **6**

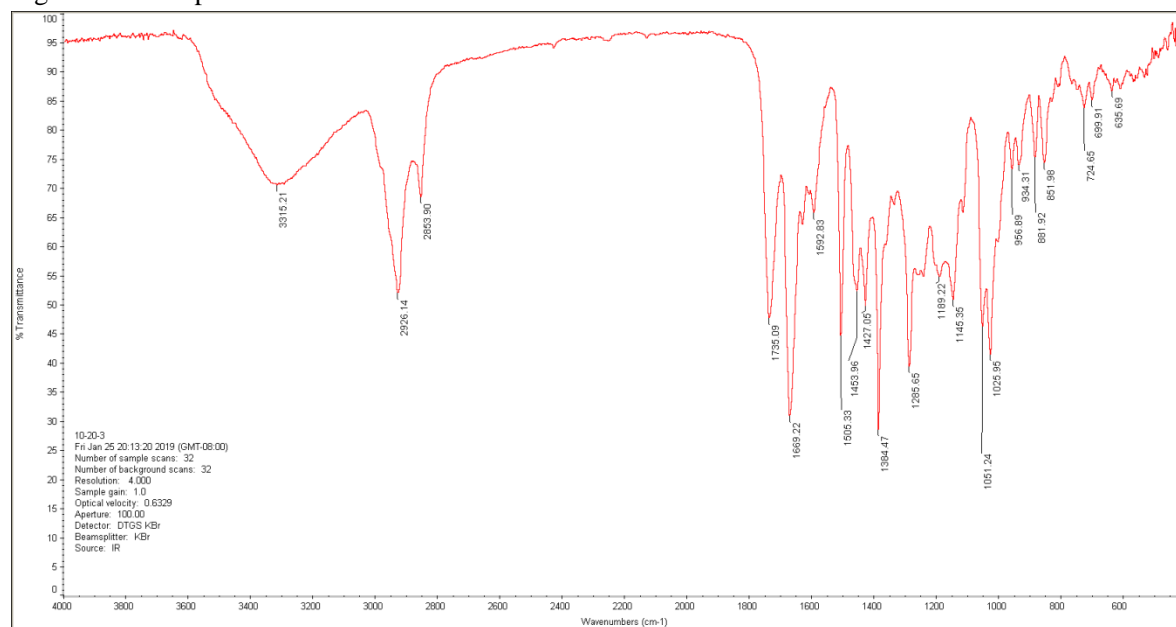

Figure S44. <sup>1</sup>H NMR (600 MHz) spectrum of **6** in DMSO-*d*<sub>6</sub>

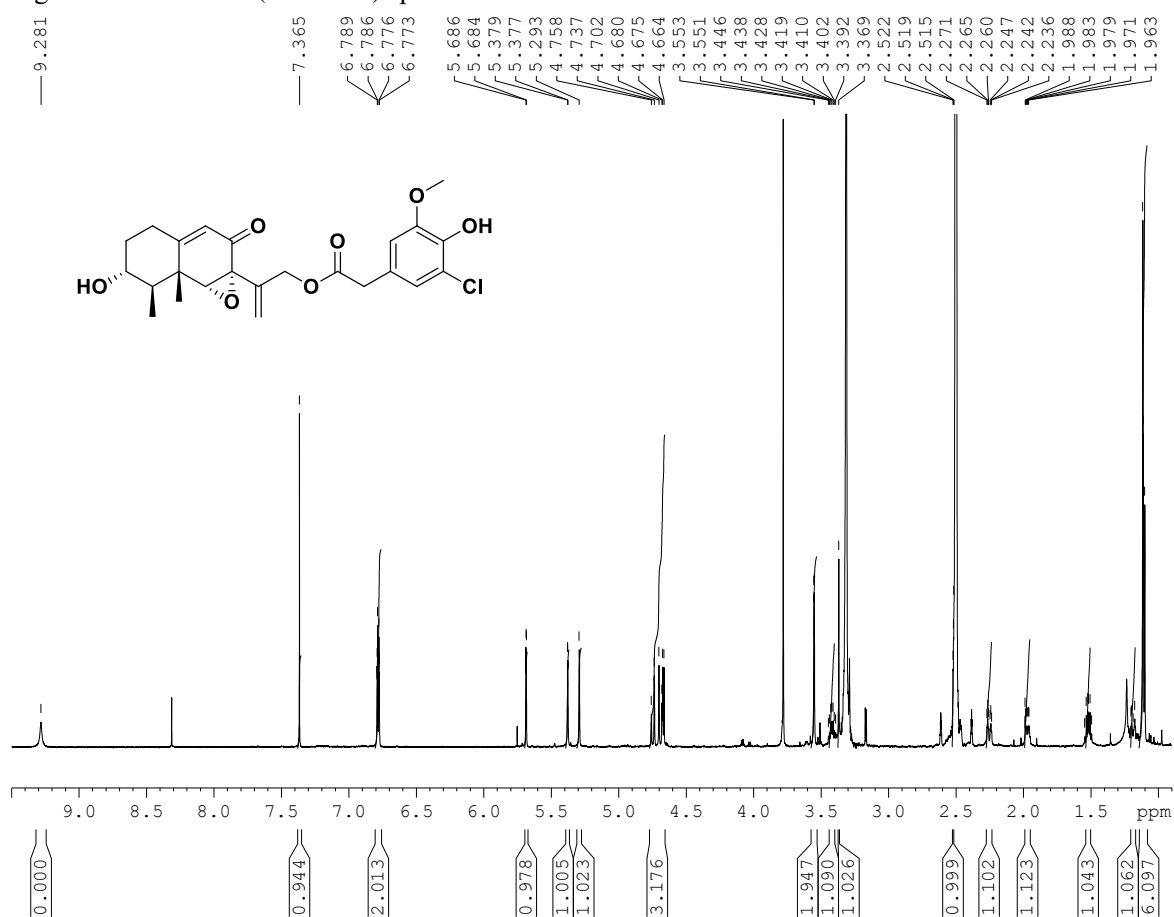

Figure S45.  $^{13}\text{C}$  NMR (150 MHz) and DEPT spectra of **6** in  $\text{DMSO}-d_6$

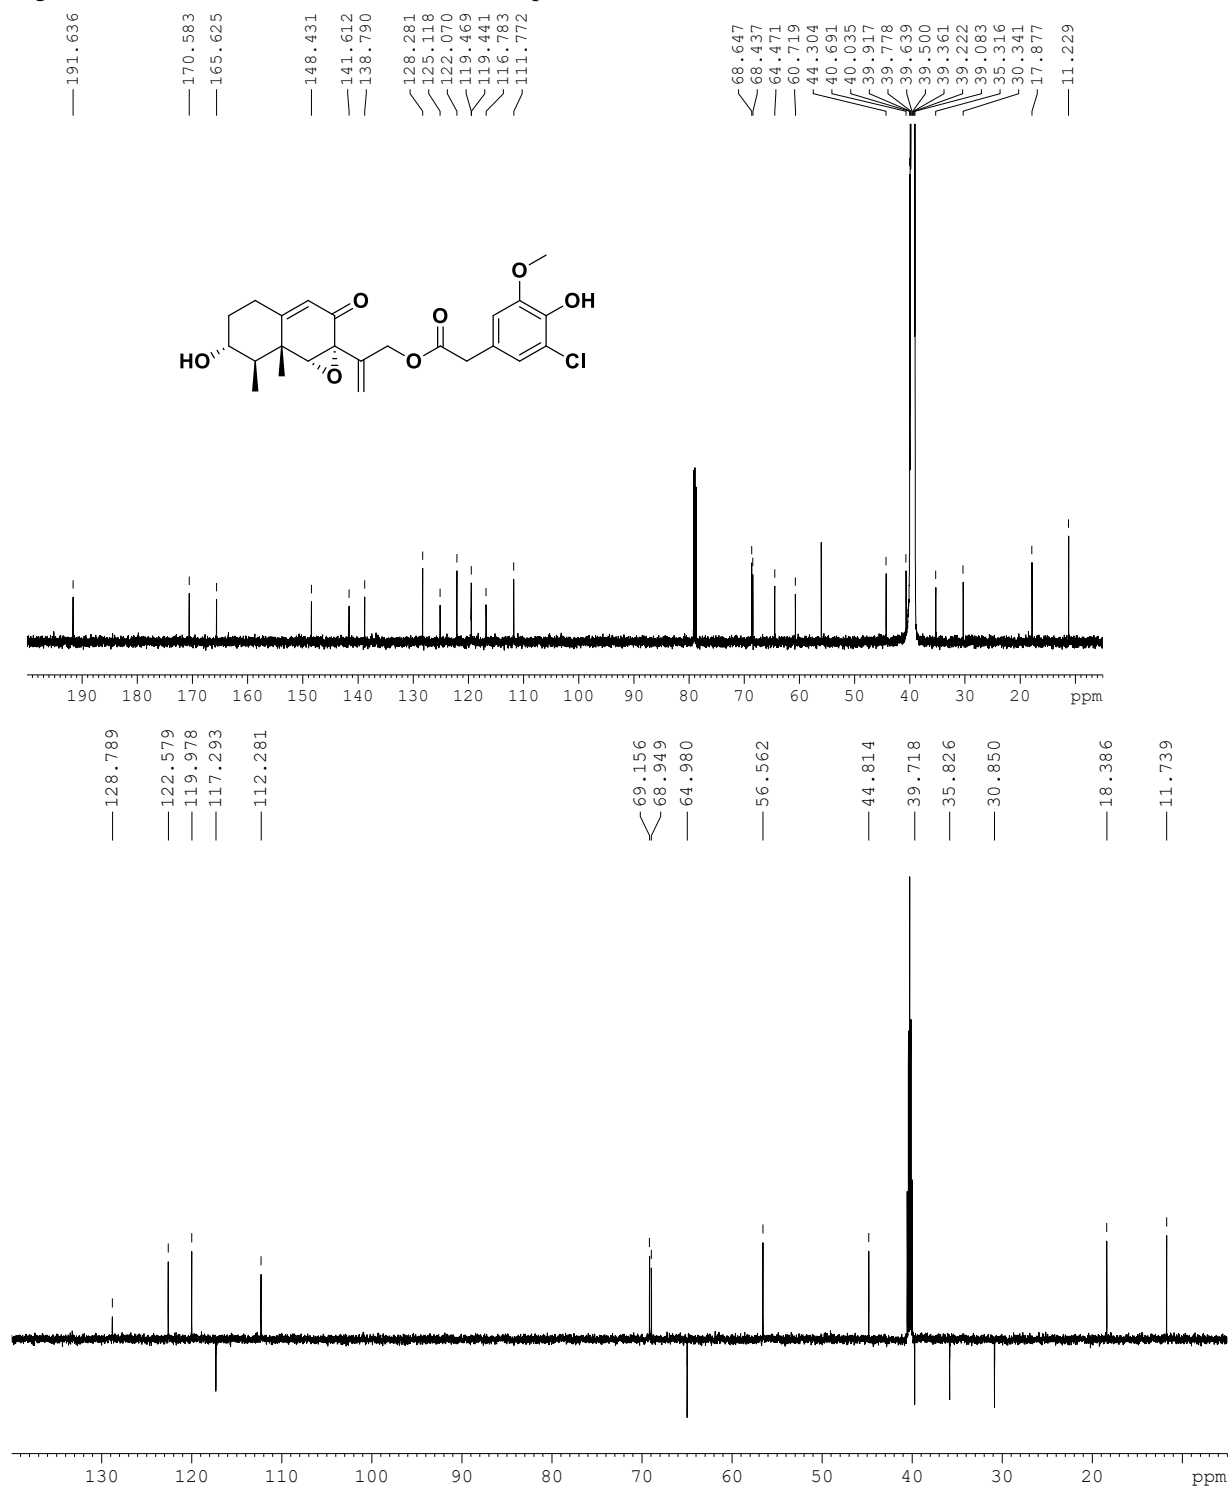

Figure S46.  $^1\text{H}$ - $^1\text{H}$  COSY spectrum of **6** in  $\text{DMSO-}d_6$

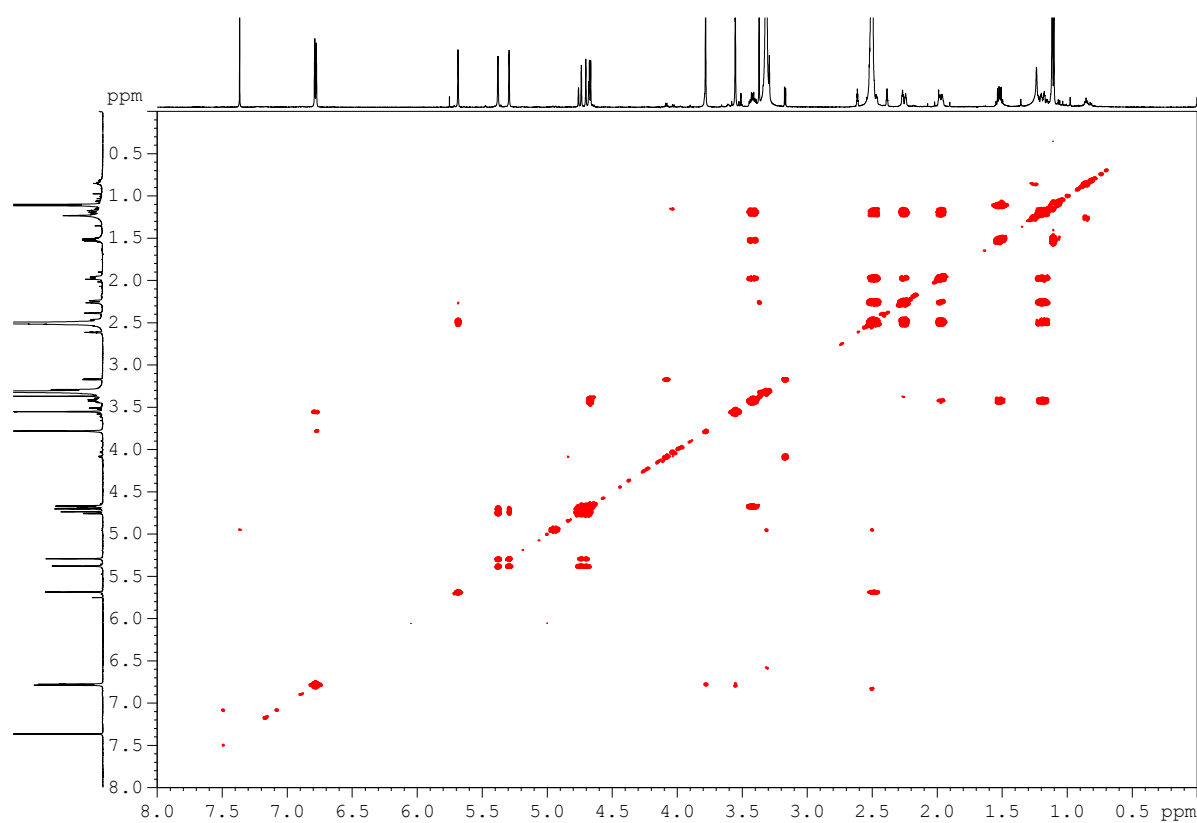

Figure S47. HSQC spectrum of **6** in  $\text{DMSO-}d_6$

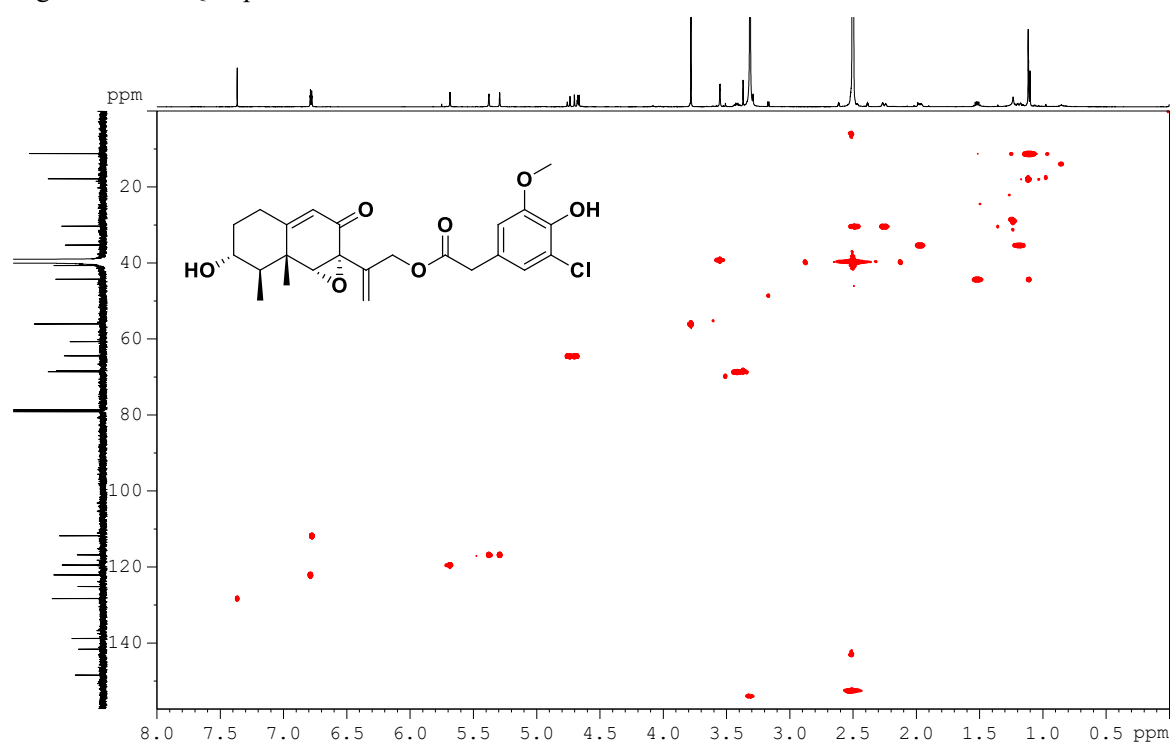



Figure S48. HMBC spectrum of **6** in DMSO-*d*<sub>6</sub>

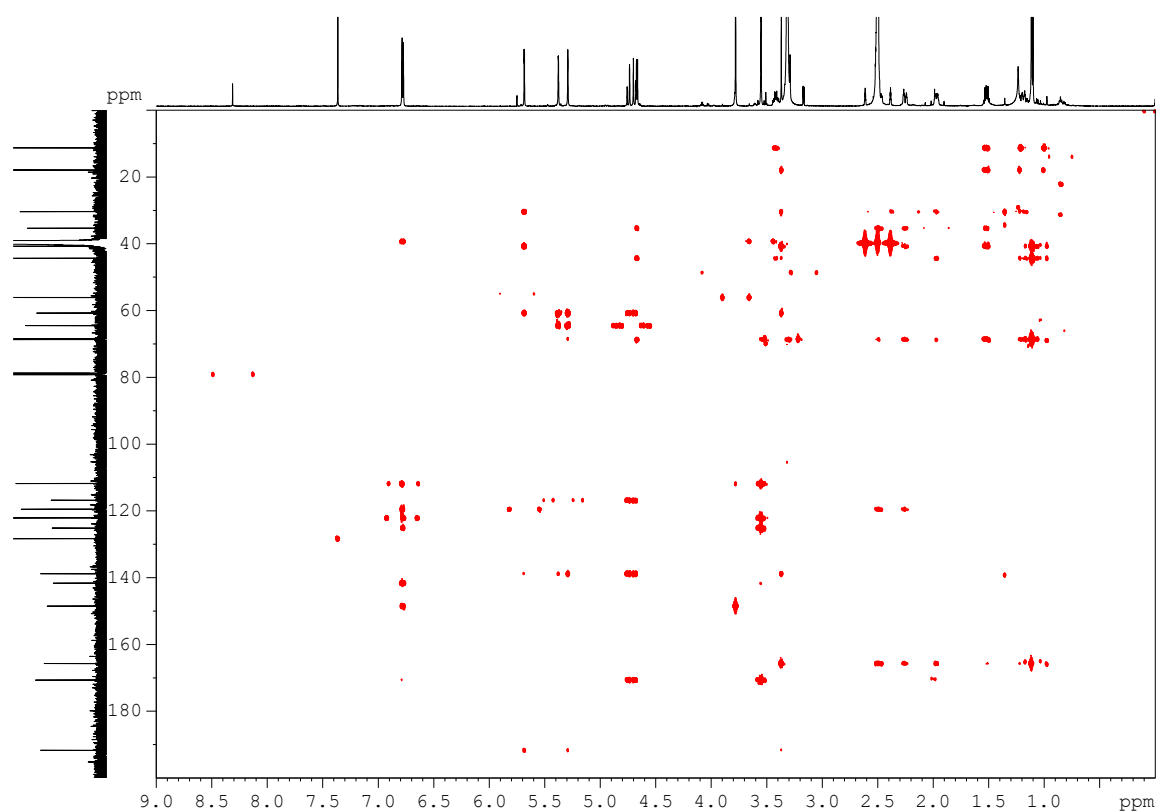

Figure S49. NOESY spectrum of **6** in DMSO-*d*<sub>6</sub>

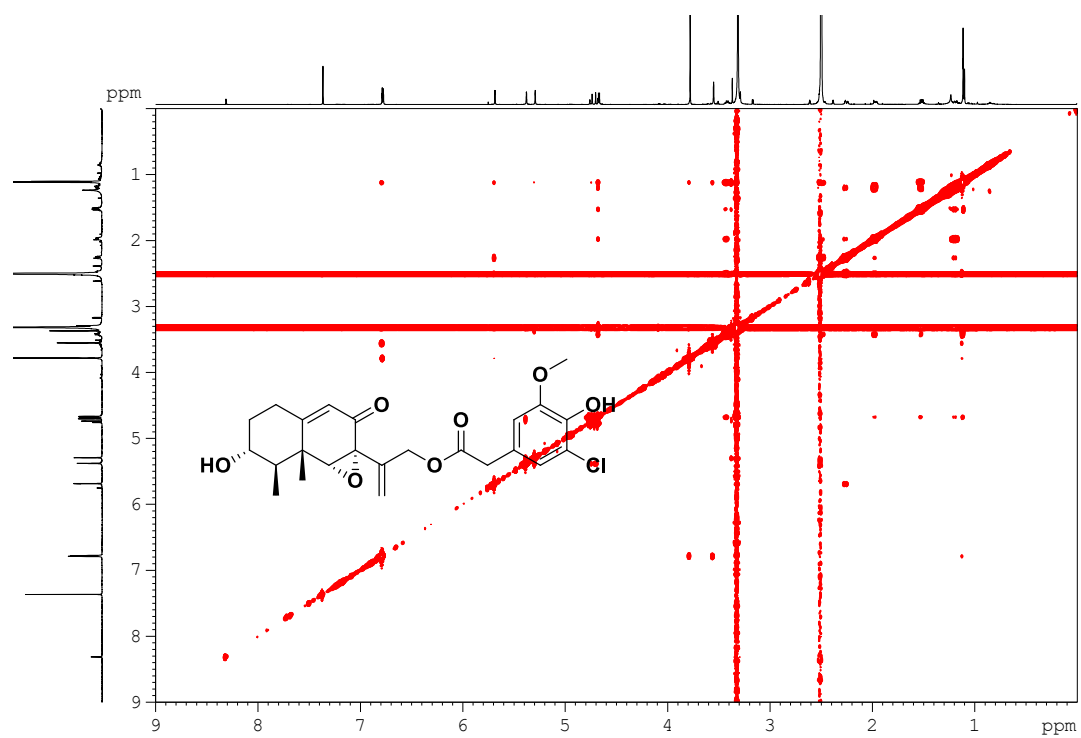

Figure S50. HRESIMS spectrum of **6**

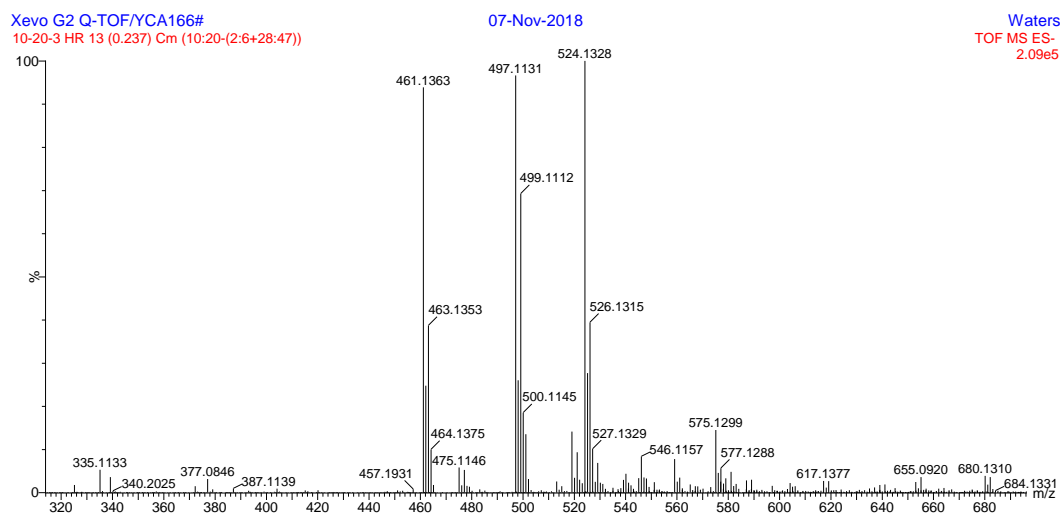

| Mass     | Calc. Mass | mDa  | PPM  | DBE  | i-FIT | Norm  | Conf(%) | Formula                                           |
|----------|------------|------|------|------|-------|-------|---------|---------------------------------------------------|
| 461.1363 | 461.1367   | -0.4 | -0.9 | 11.5 | 185.3 | 0.000 | 100.00  | C <sub>24</sub> H <sub>26</sub> O <sub>7</sub> Cl |

Figure S51. IR spectrum of **7**

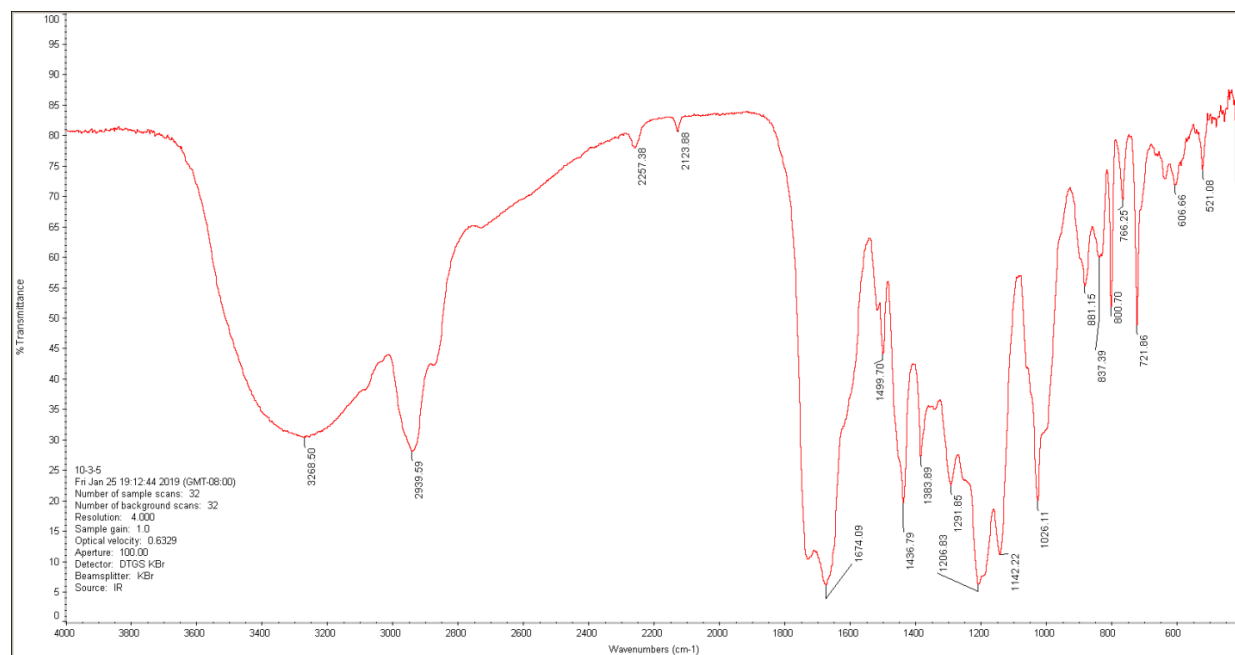

Figure S52.  $^1\text{H}$  NMR (600 MHz) spectrum of **7** in  $\text{DMSO}-d_6$

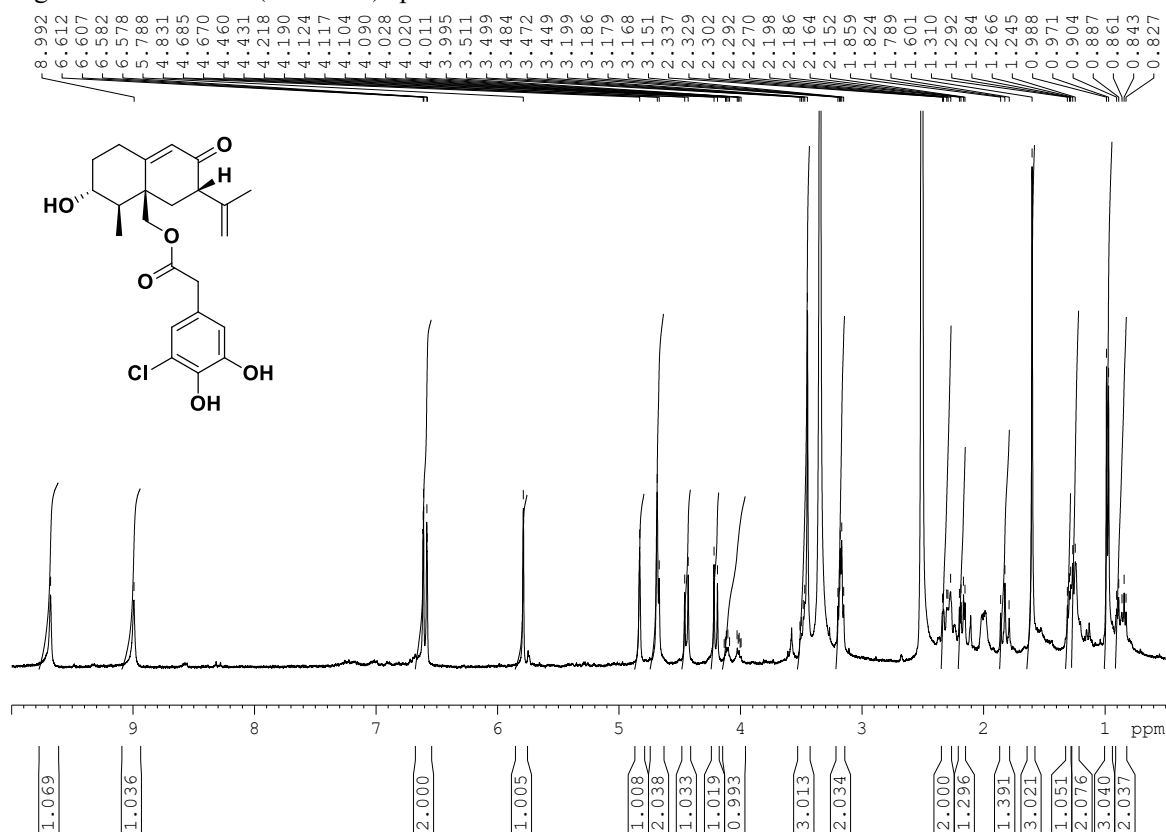

Figure S53.  $^{13}\text{C}$  NMR (150 MHz) spectrum of **7** in  $\text{DMSO}-d_6$

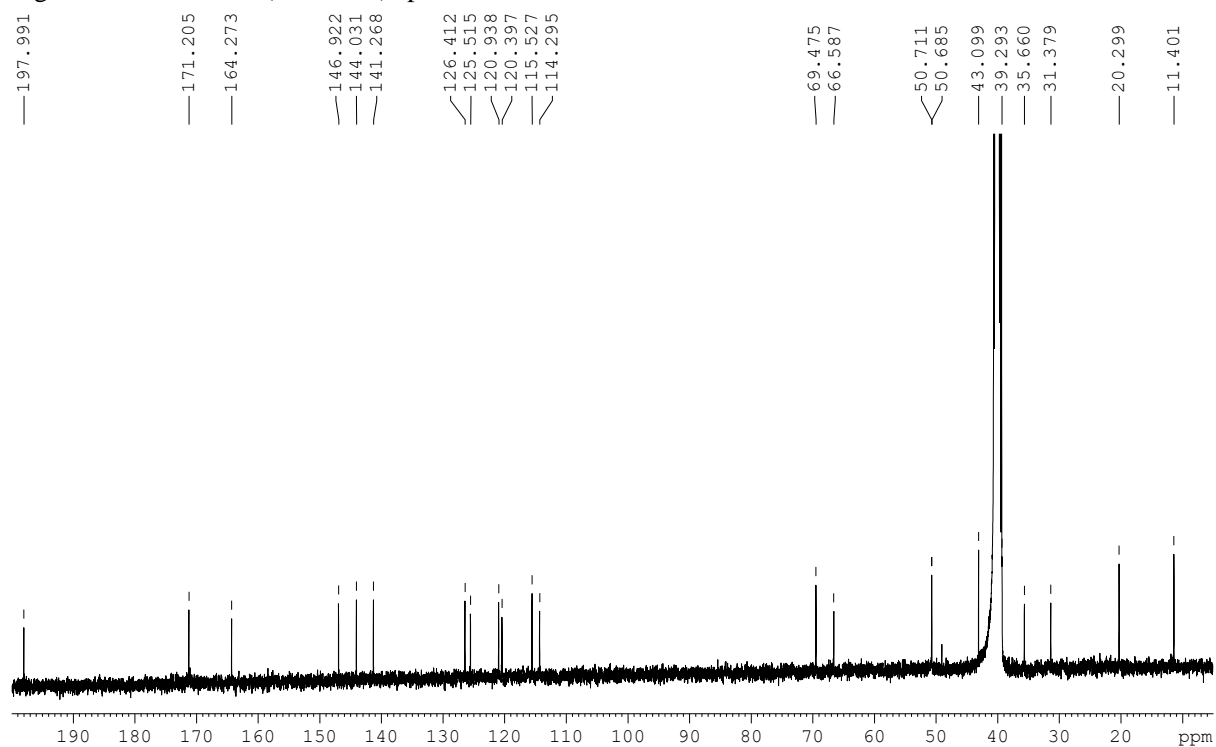

Figure S54. DEPT spectrum of **7** in DMSO-*d*<sub>6</sub>

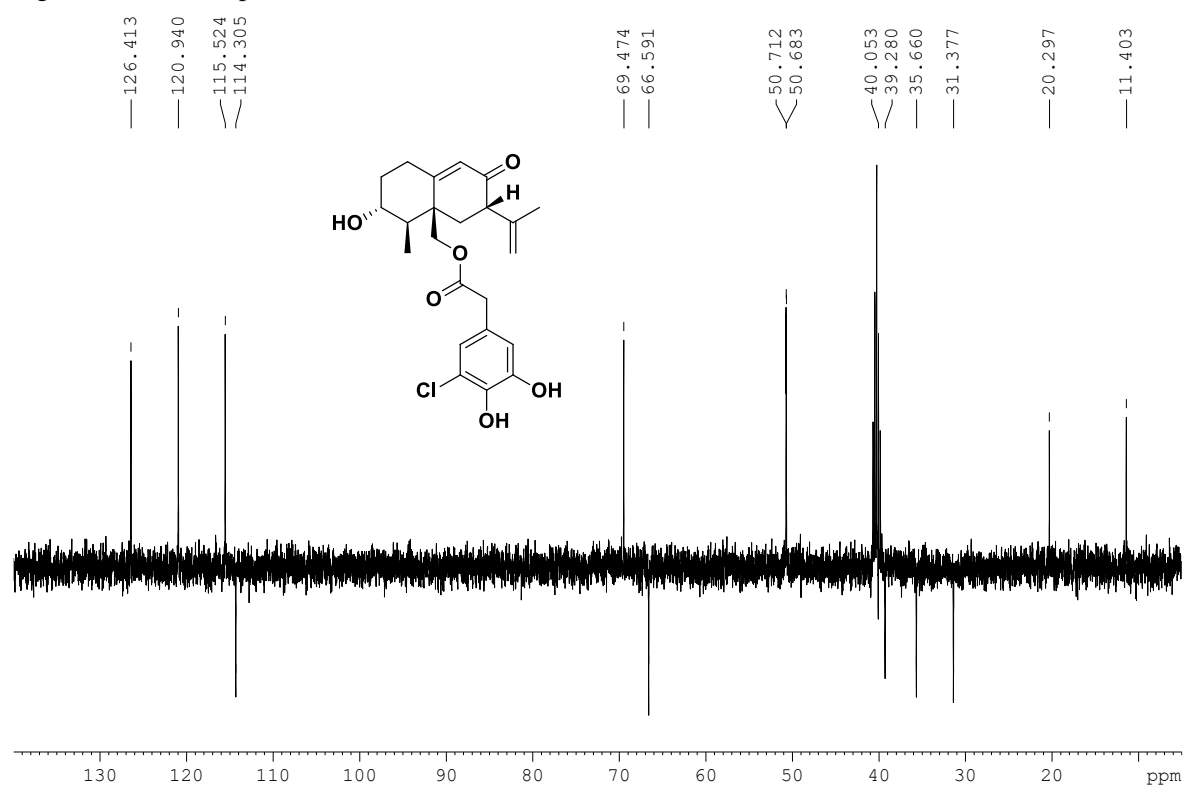

Figure S55. <sup>1</sup>H-<sup>1</sup>H COSY spectrum of **7** in DMSO-*d*<sub>6</sub>

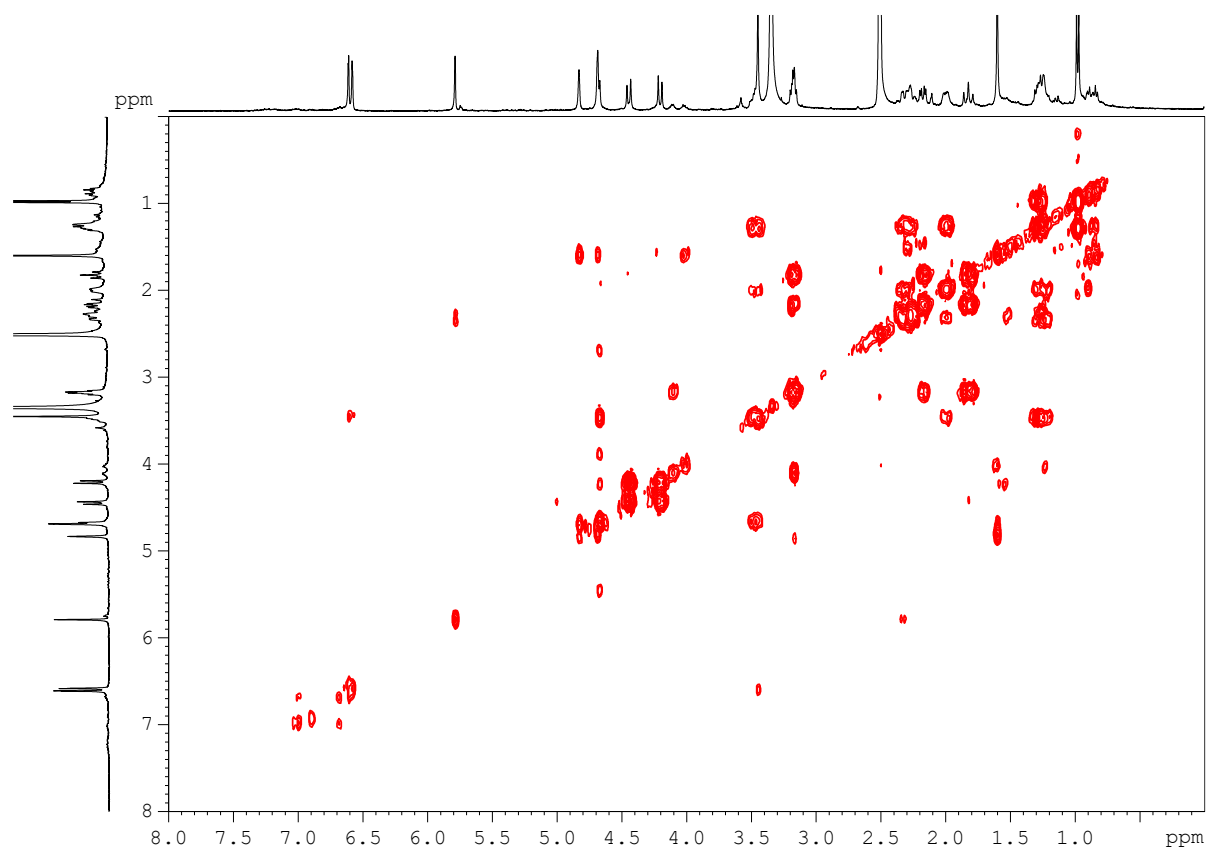

Figure S56. HSQC spectrum of **7** in DMSO-*d*<sub>6</sub>

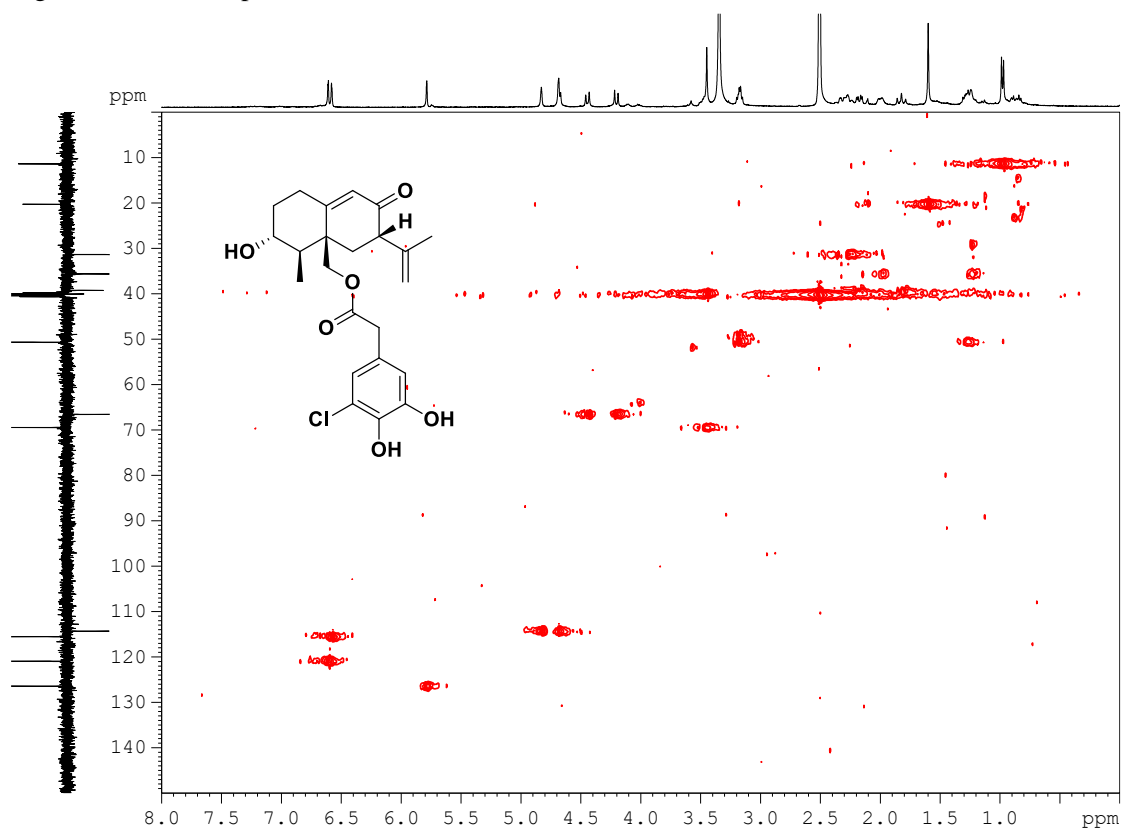

Figure S57. HMBC spectrum of **7** in DMSO-*d*<sub>6</sub>

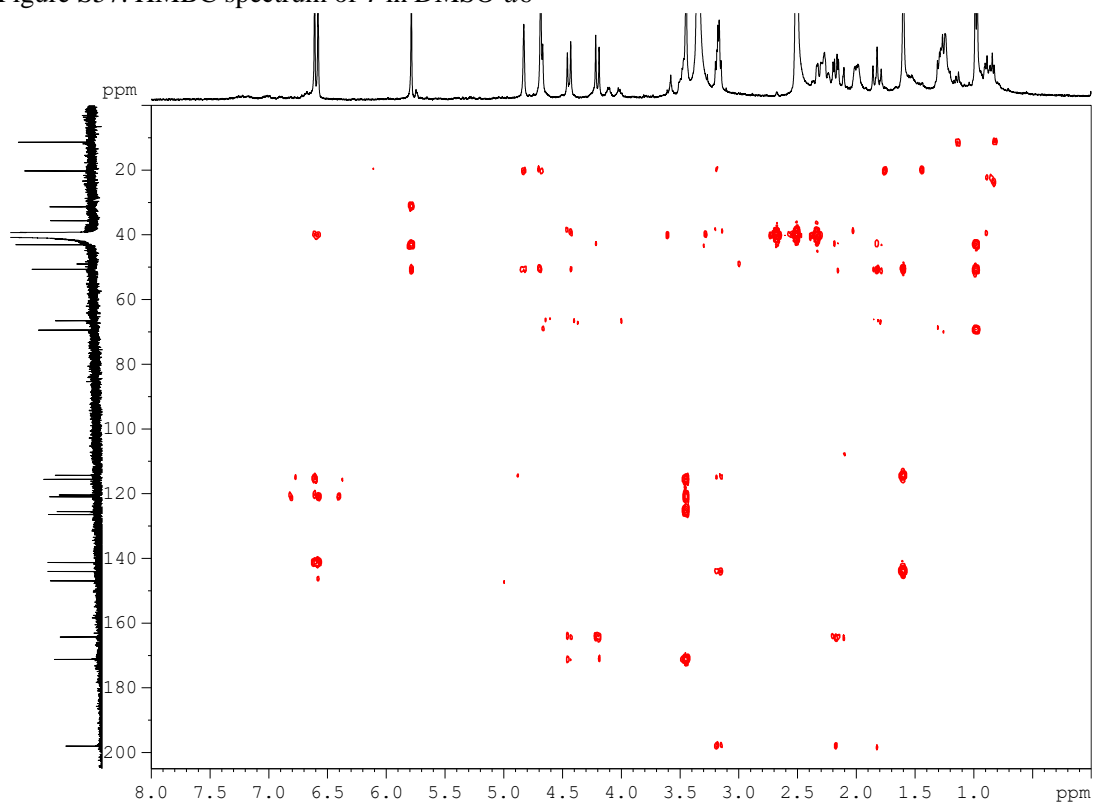

Figure S58. NOESY spectrum of **7** in DMSO-*d*<sub>6</sub>

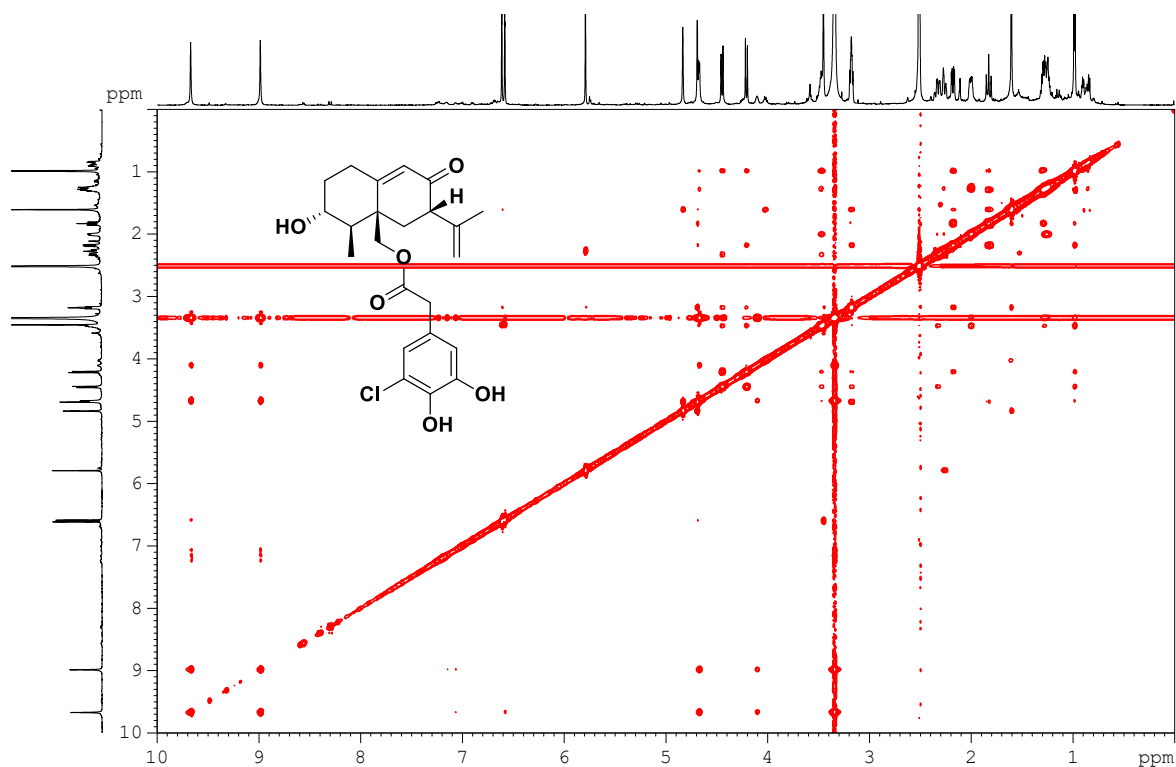

Figure S59. HRESIMS spectrum of **7**

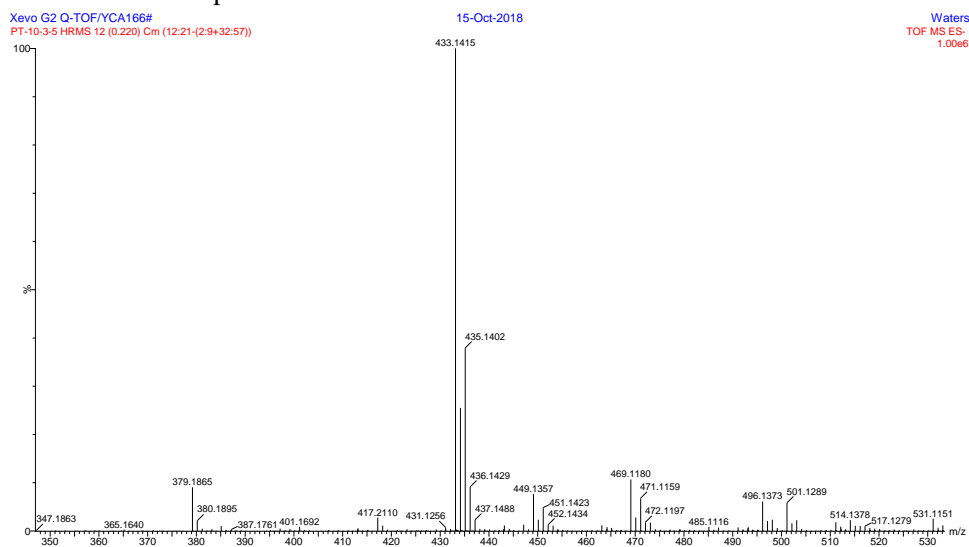

| Mass     | Calc. Mass | mDa  | PPM  | DBE  | i-FIT | Norm | Conf(%) | Formula                                           |
|----------|------------|------|------|------|-------|------|---------|---------------------------------------------------|
| 443.1415 | 443.1418   | -0.3 | -0.7 | 10.5 | 646.7 | n/a  | n/a     | C <sub>23</sub> H <sub>26</sub> O <sub>6</sub> Cl |

Figure S60. IR spectrum of **8**

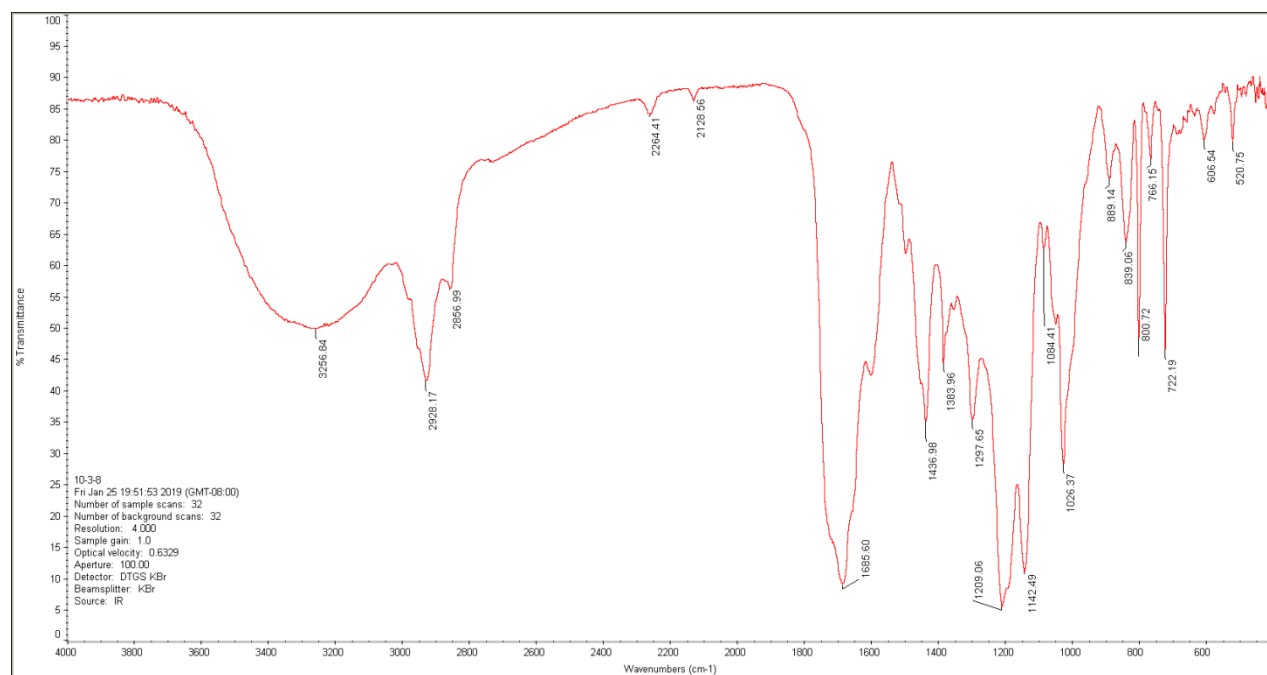

Figure S61. <sup>1</sup>H NMR (600 MHz) spectrum of **8** in DMSO-*d*<sub>6</sub>

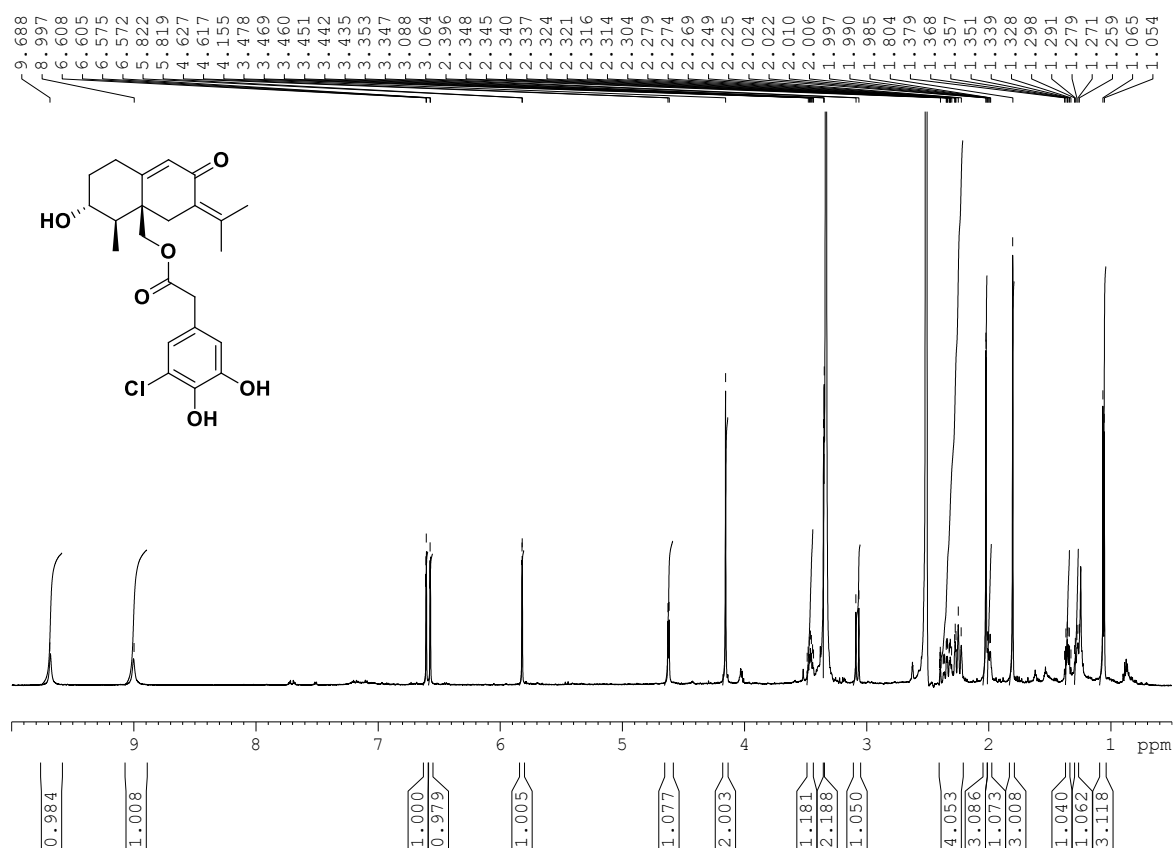

Figure S62.  $^{13}\text{C}$  NMR (150 MHz) and DEPT spectra of **8** in  $\text{DMSO-}d_6$

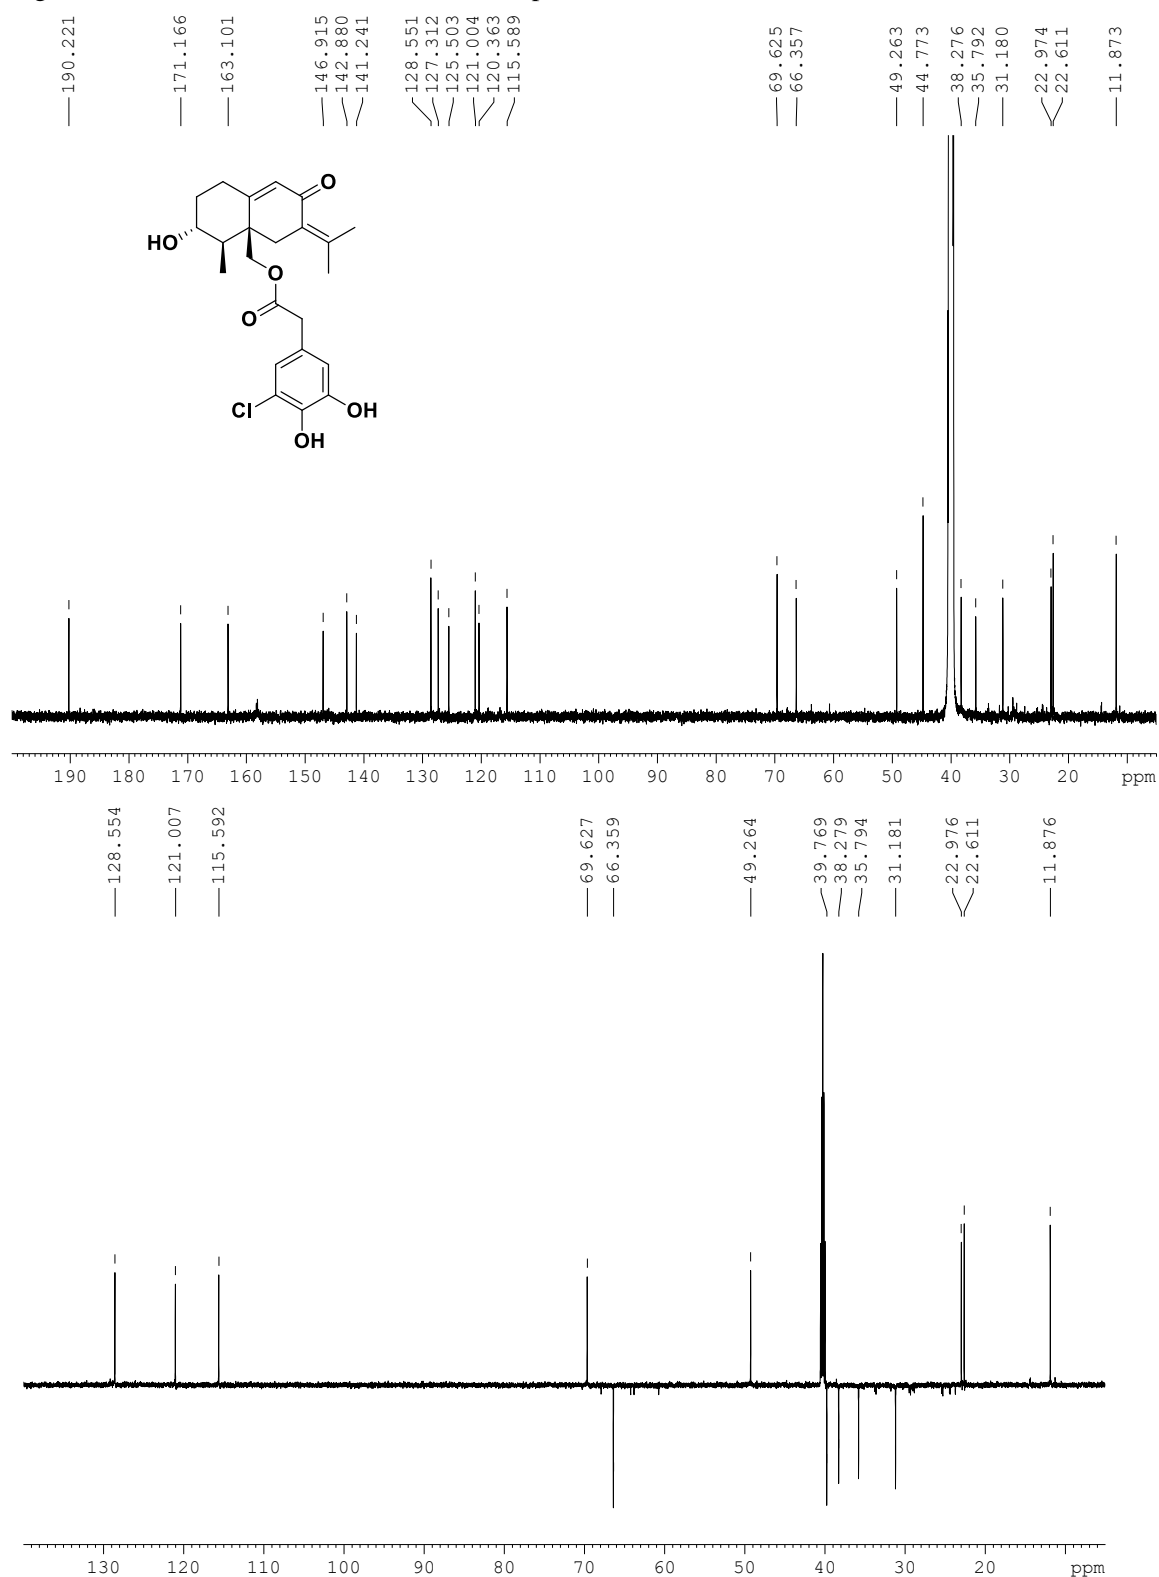



Figure S63.  $^1\text{H}$ - $^1\text{H}$  COSY spectrum of **8** in DMSO- $d_6$

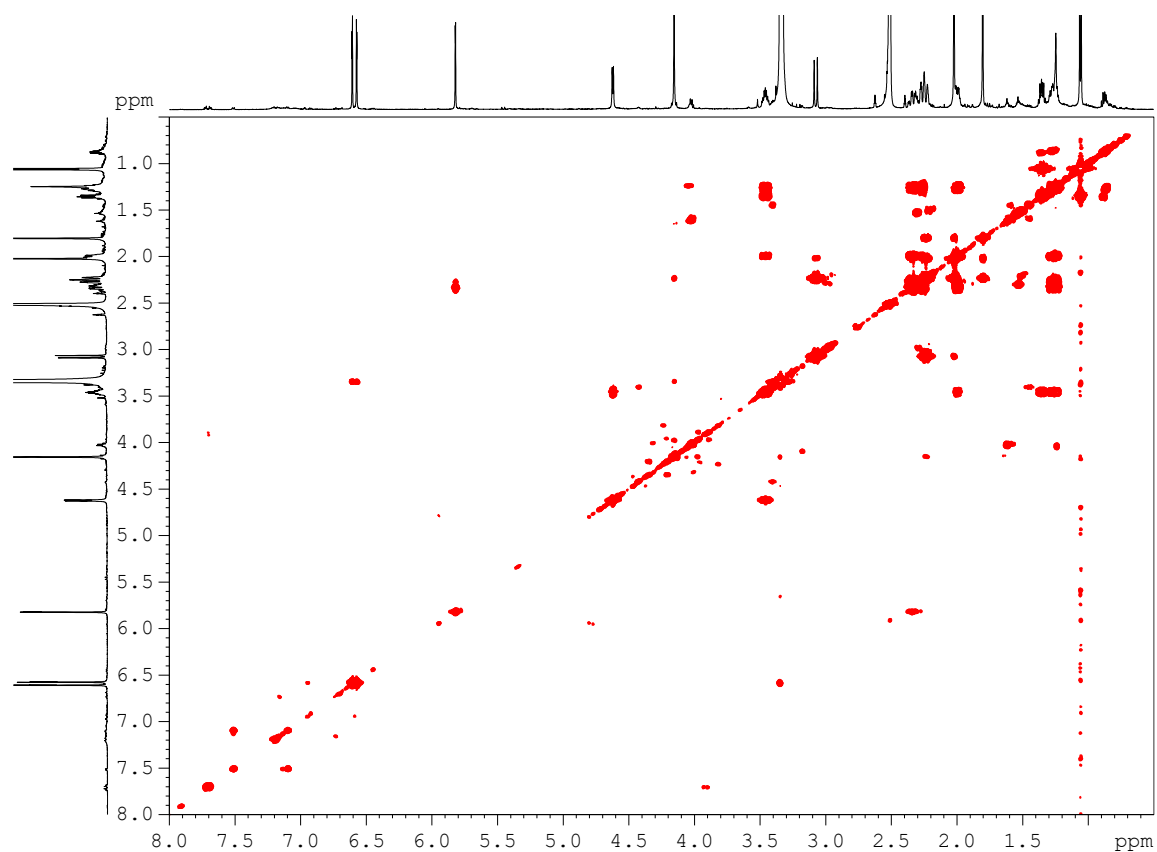

Figure S64. HSQC spectrum of **8** in DMSO- $d_6$

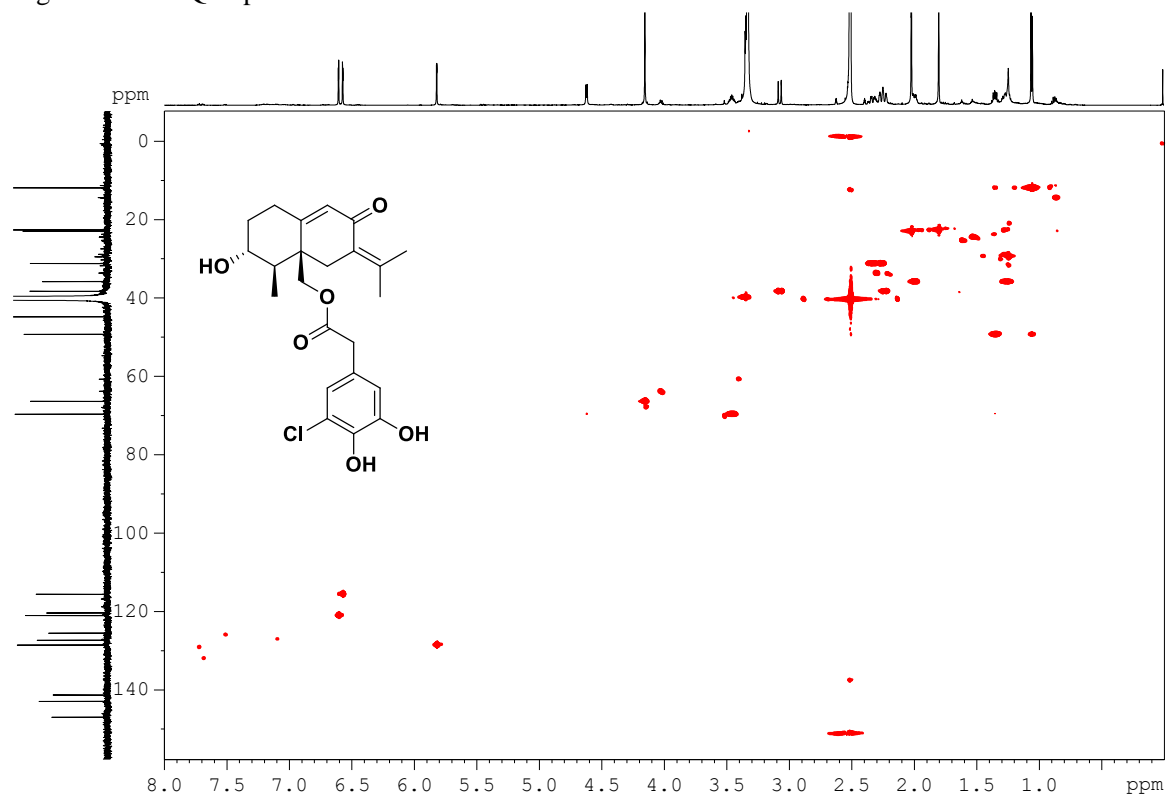

Figure S65. HMBC spectrum of **8** in DMSO-*d*<sub>6</sub>

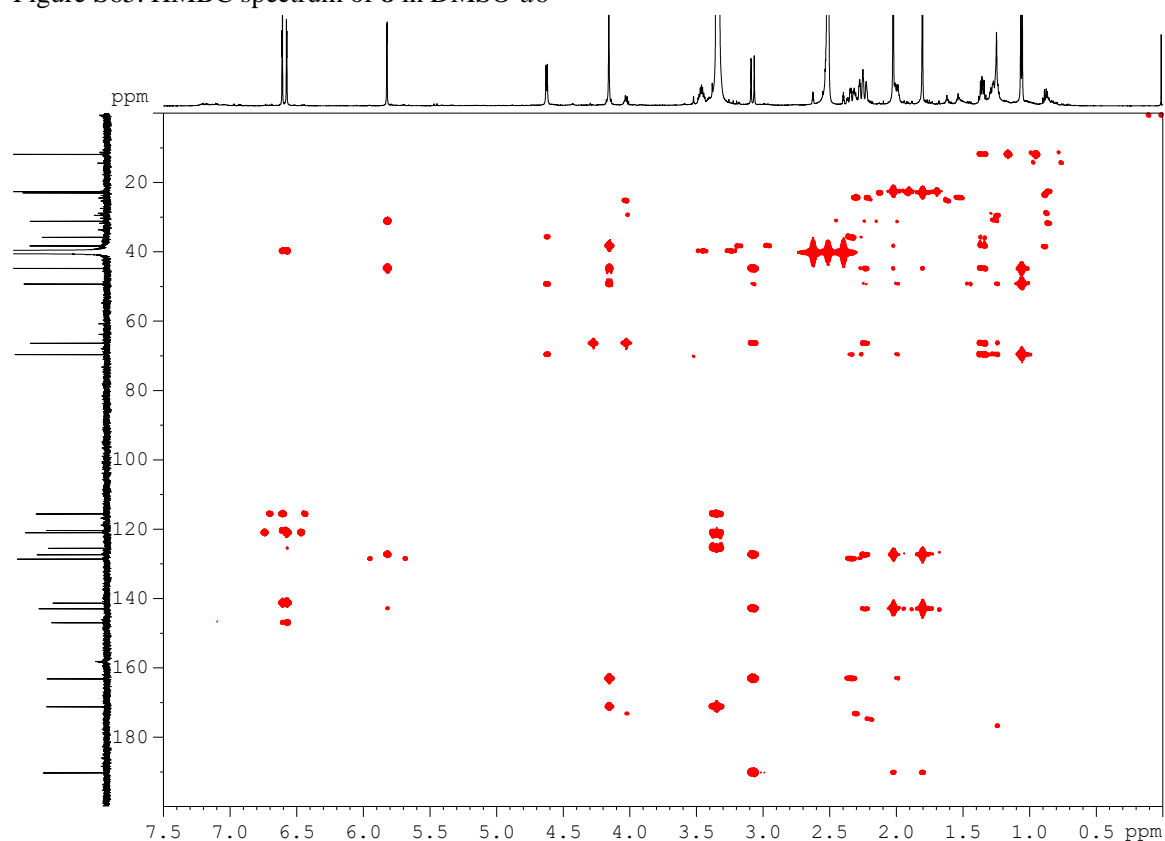

Figure S66. NOESY spectrum of **8** in DMSO-*d*<sub>6</sub>

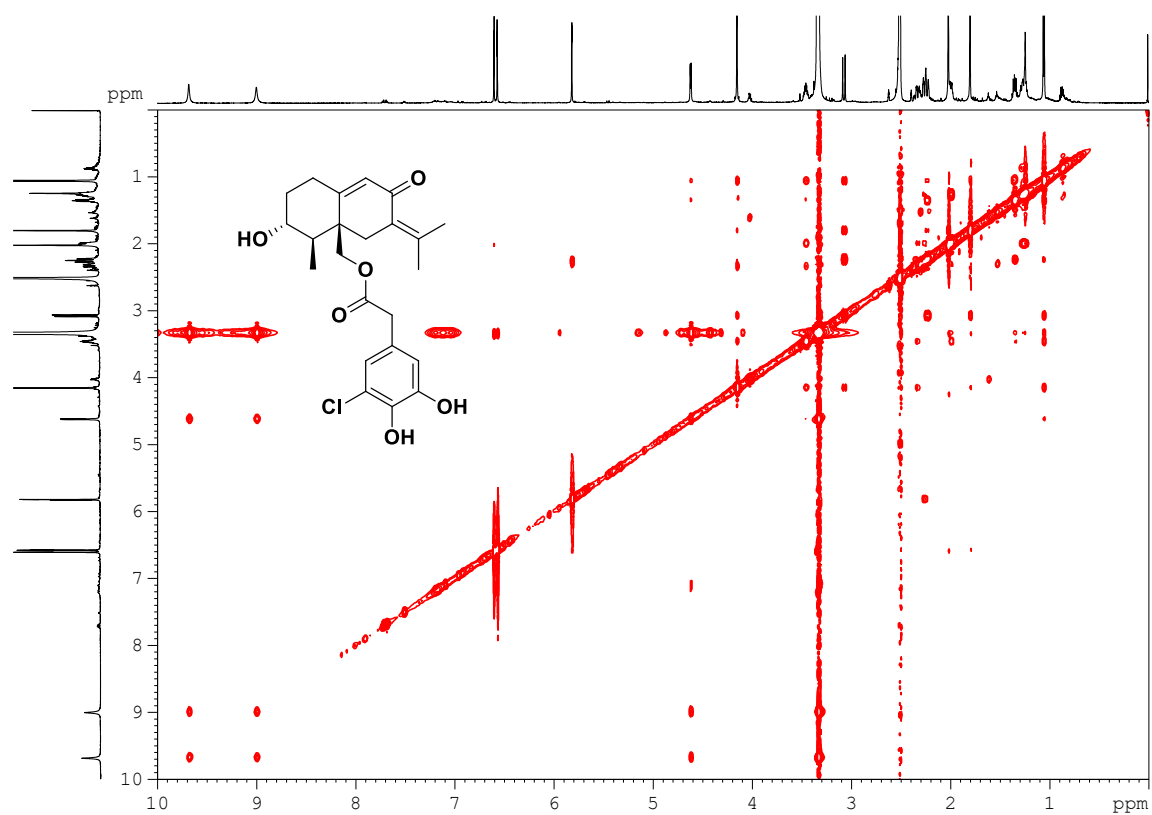

Figure S67. HRESIMS spectrum of **8**

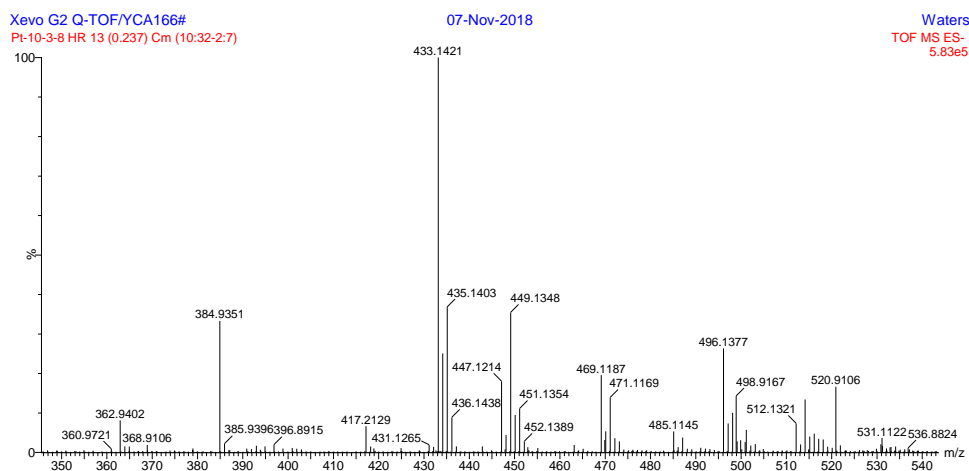

| Mass     | Calc. Mass | mDa | PPM | DBE  | i-FIT | Norm  | Conf(%) | Formula                                           |
|----------|------------|-----|-----|------|-------|-------|---------|---------------------------------------------------|
| 443.1421 | 443.1418   | 0.3 | 0.7 | 10.5 | 610.1 | 0.000 | 100.00  | C <sub>23</sub> H <sub>26</sub> O <sub>6</sub> Cl |

Figure S68. IR spectrum of **9**

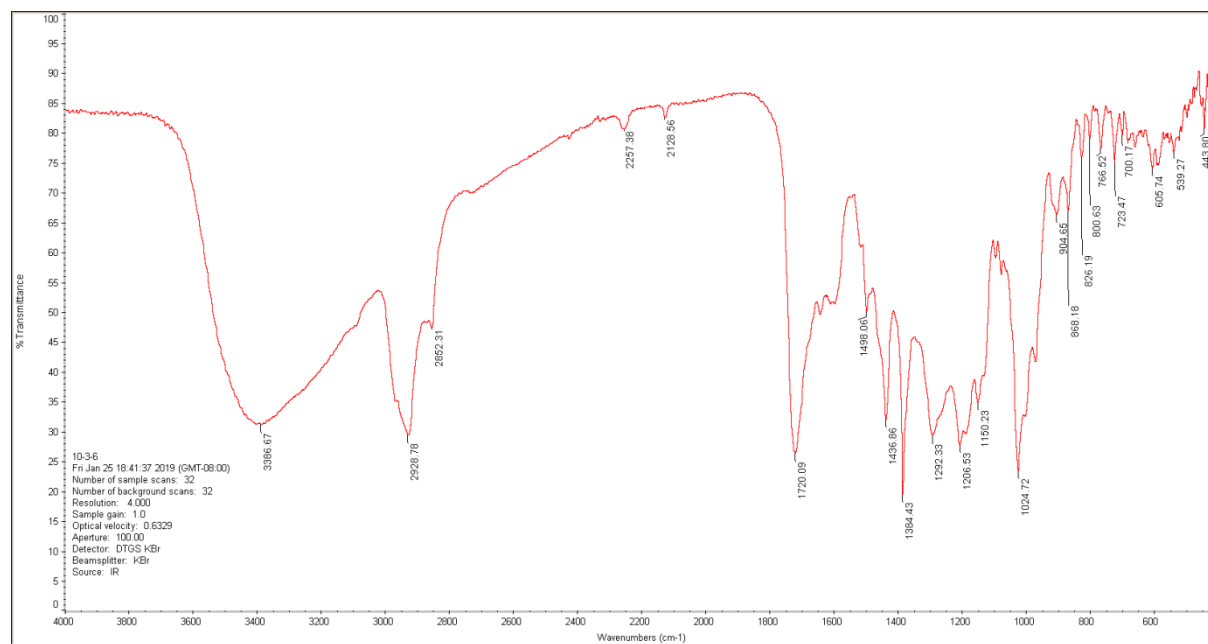

Figure S69.  $^1\text{H}$  NMR (600 MHz) spectrum of **9** in  $\text{DMSO}-d_6$

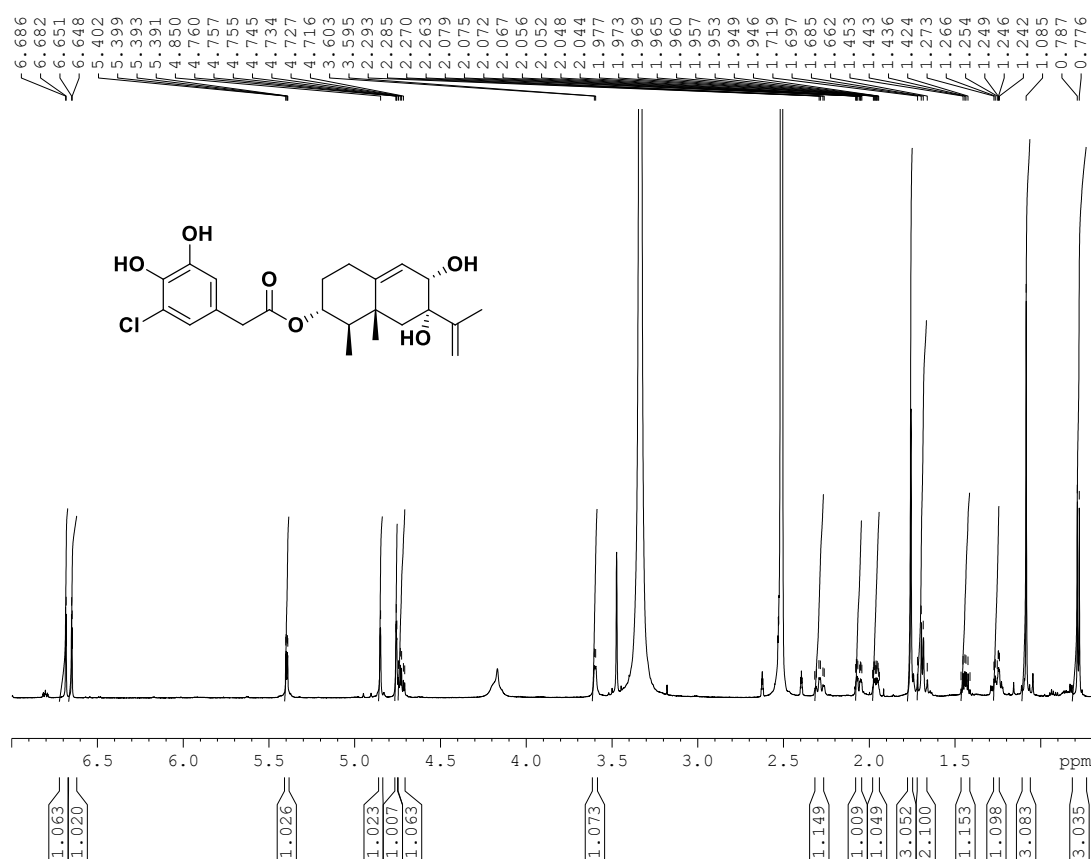

Figure S70.  $^{13}\text{C}$  NMR (150 MHz) spectrum of **9** in  $\text{DMSO}-d_6$

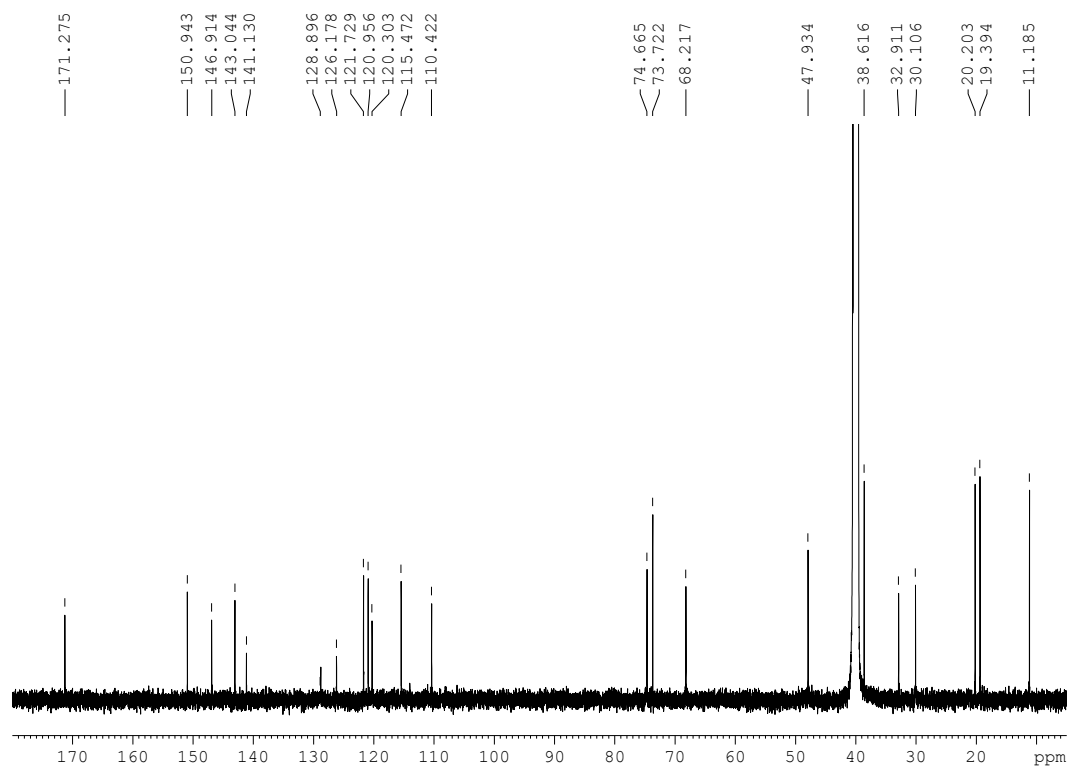

Figure S71. DEPT spectrum of **9** in DMSO-*d*<sub>6</sub>

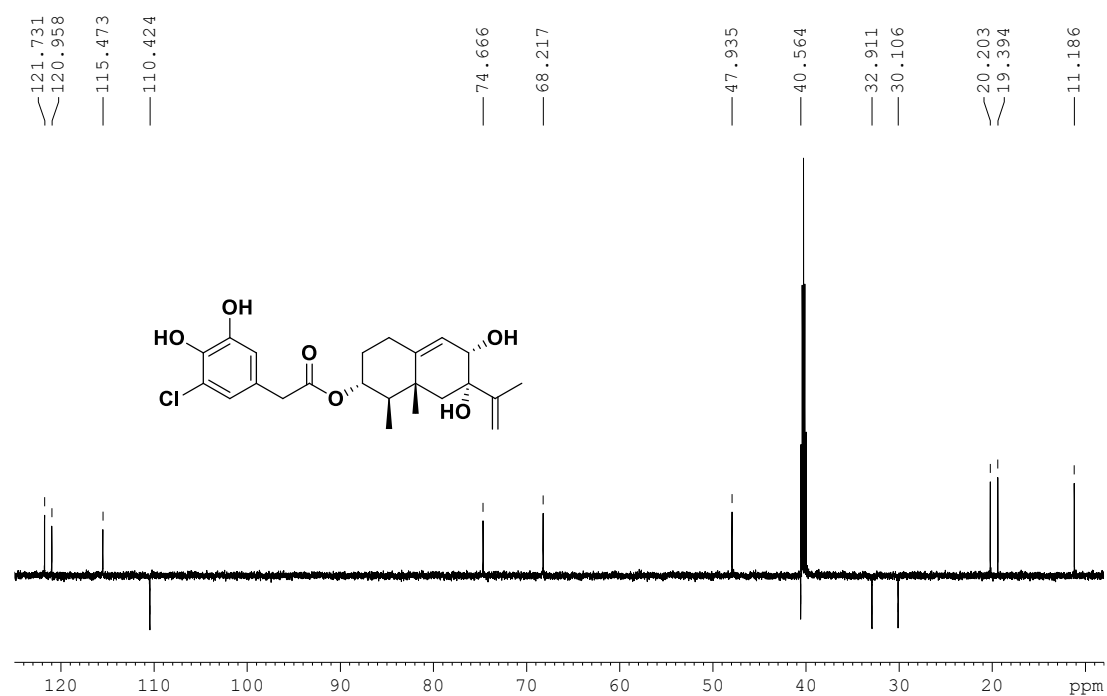

Figure S72. <sup>1</sup>H-<sup>1</sup>H COSY spectrum of **9** in DMSO-*d*<sub>6</sub>

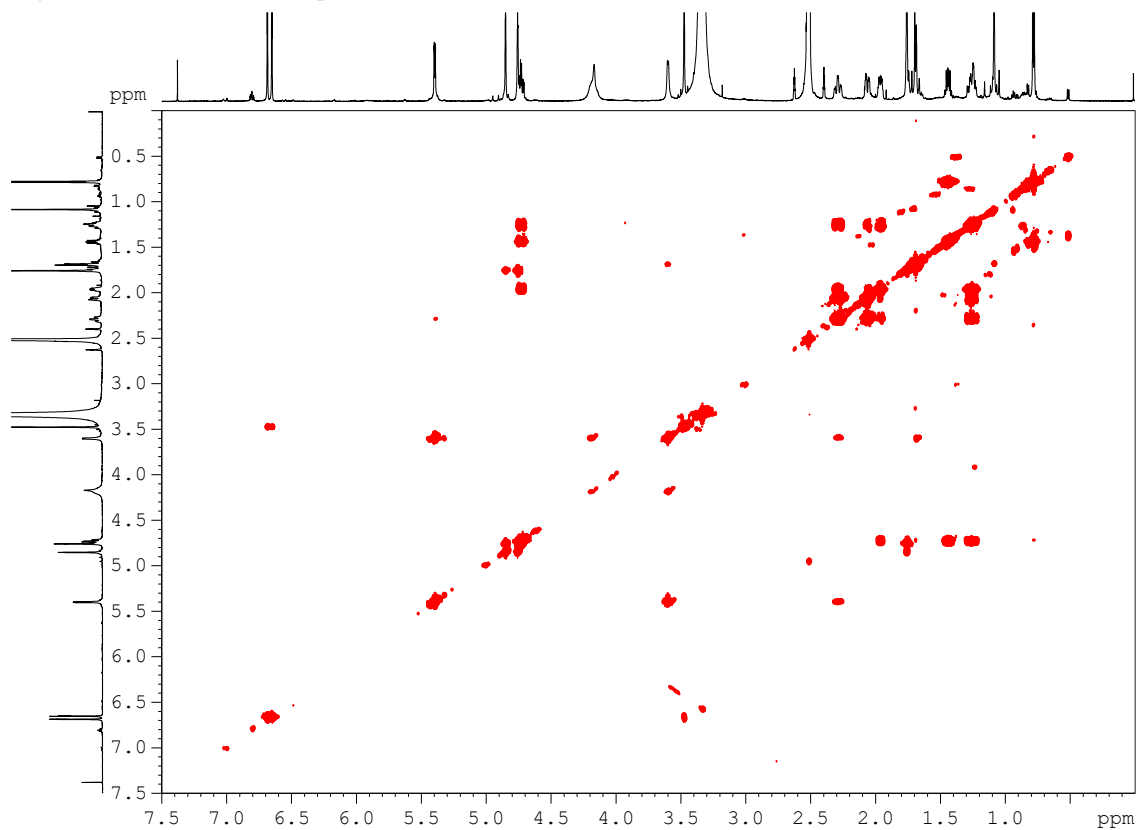

Figure S73. HSQC spectrum of **9** in DMSO-*d*<sub>6</sub>

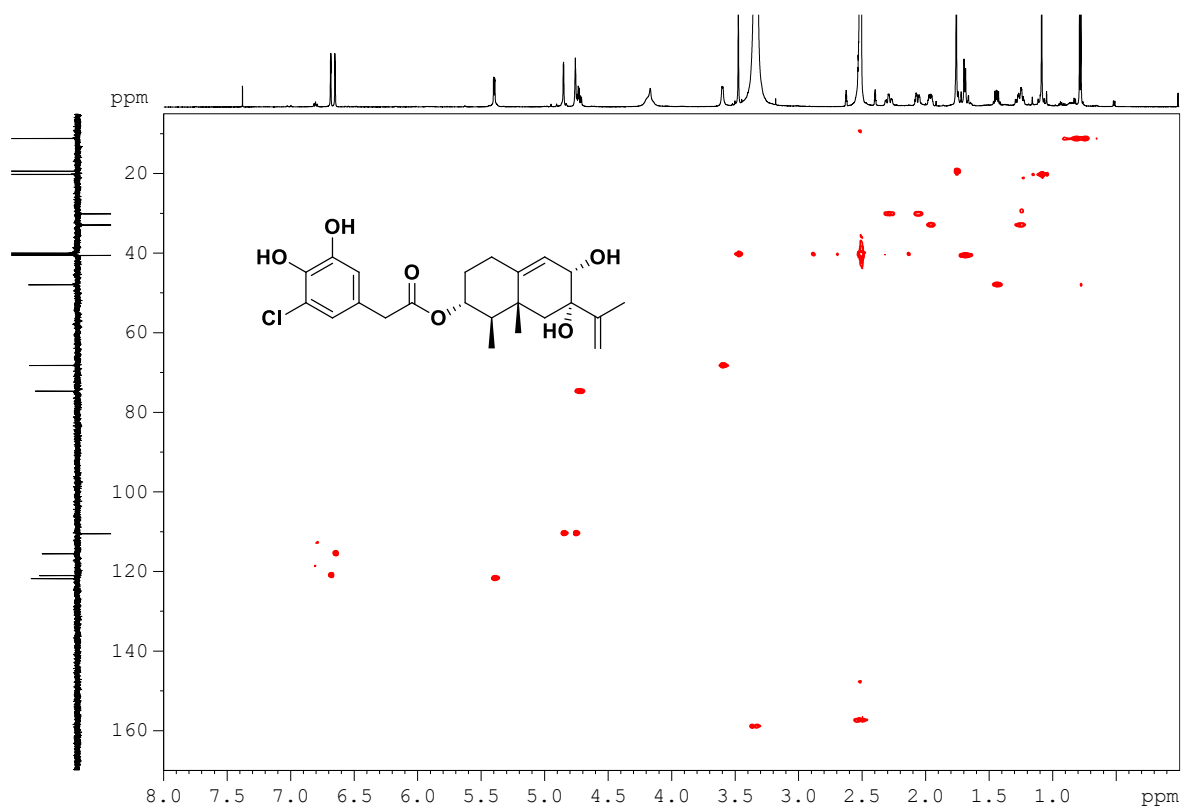

Figure S74. HMBC spectrum of **9** in DMSO-*d*<sub>6</sub>

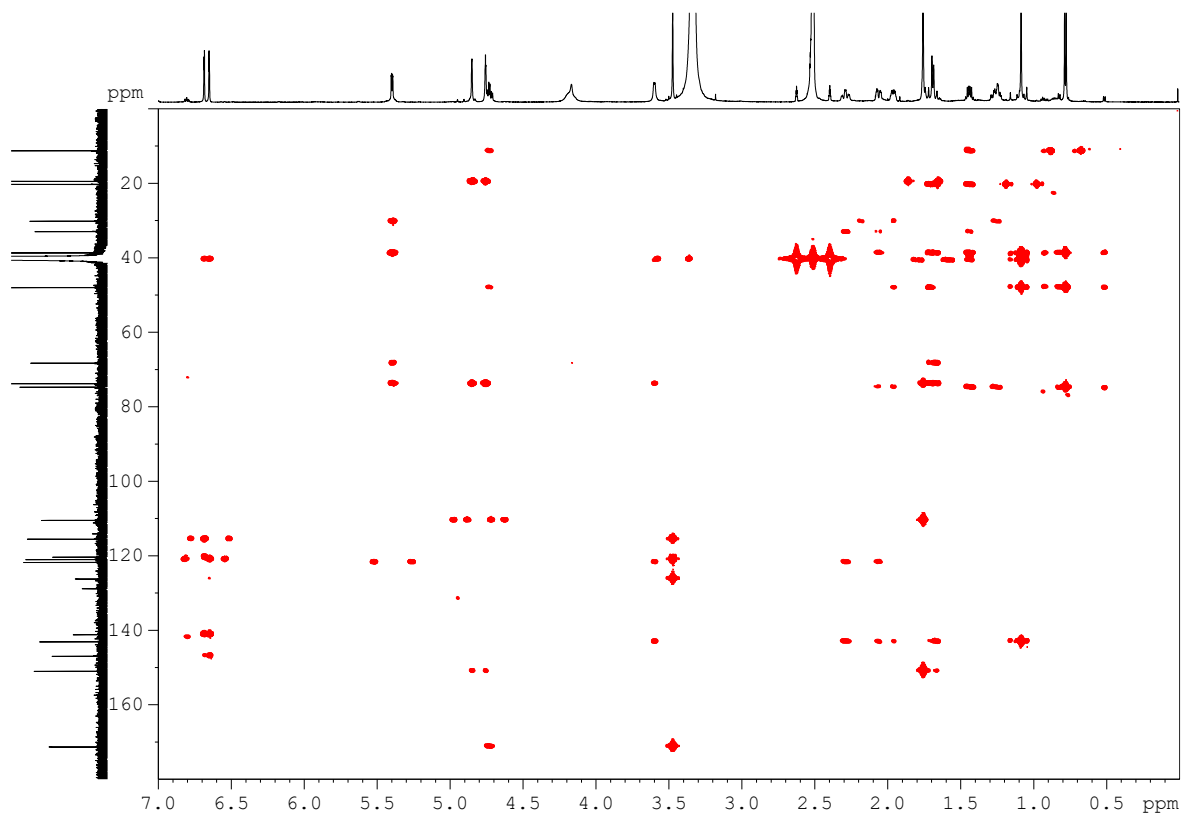

Figure S75. NOESY spectrum of **9** in DMSO-*d*<sub>6</sub>

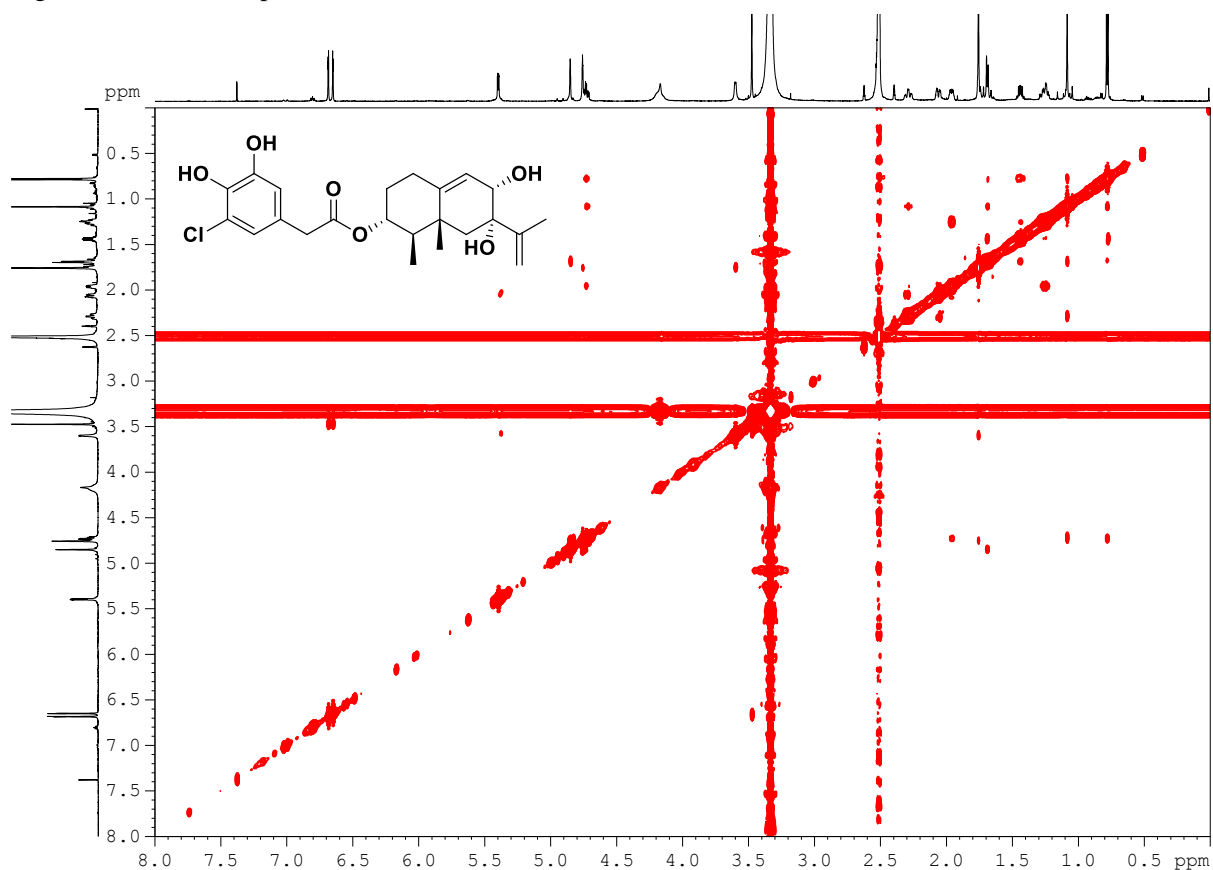

Figure S76. HRESIMS spectrum of **9**

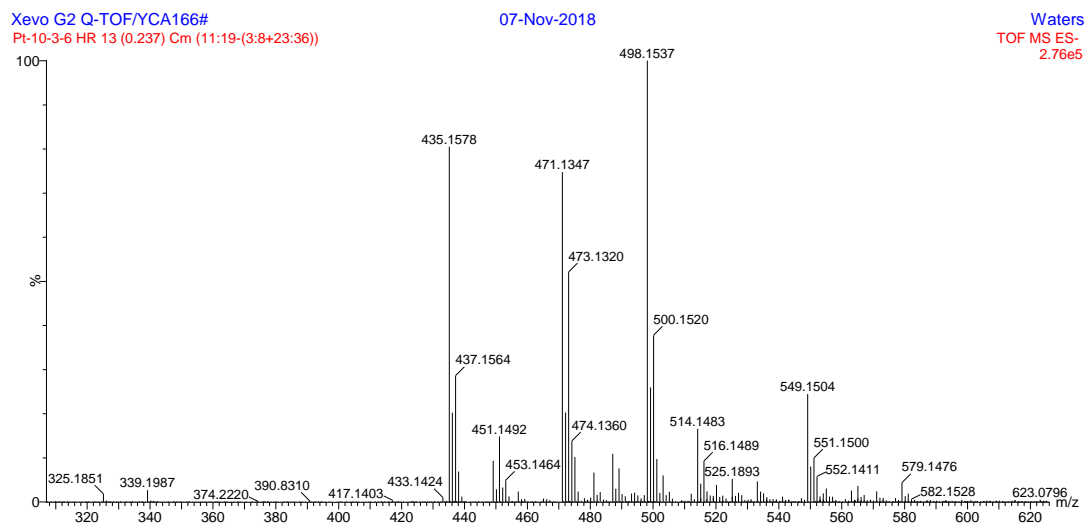

| Mass     | Calc. Mass | mDa | PPM | DBE | i-FIT | Norm  | Conf(%) | Formula                                           |
|----------|------------|-----|-----|-----|-------|-------|---------|---------------------------------------------------|
| 435.1578 | 435.1574   | 0.4 | 0.9 | 9.5 | 257.3 | 0.000 | 100.00  | C <sub>23</sub> H <sub>28</sub> O <sub>6</sub> Cl |

Figure S77. IR spectrum of **10**

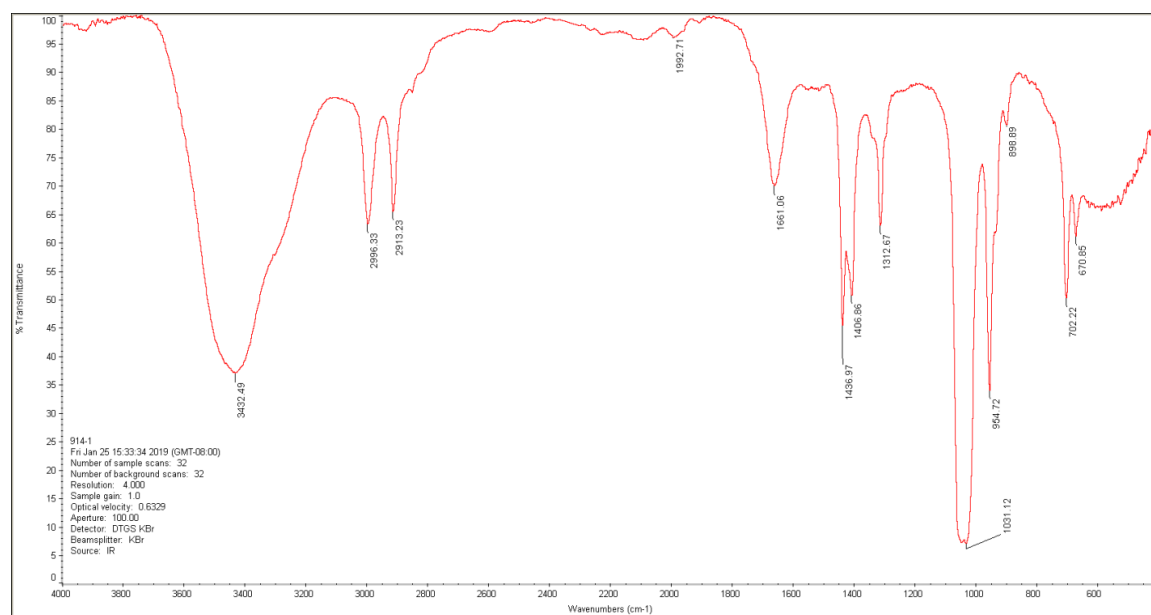

Figure S78. <sup>1</sup>H NMR (600 MHz) spectrum of **10** in DMSO-*d*<sub>6</sub>

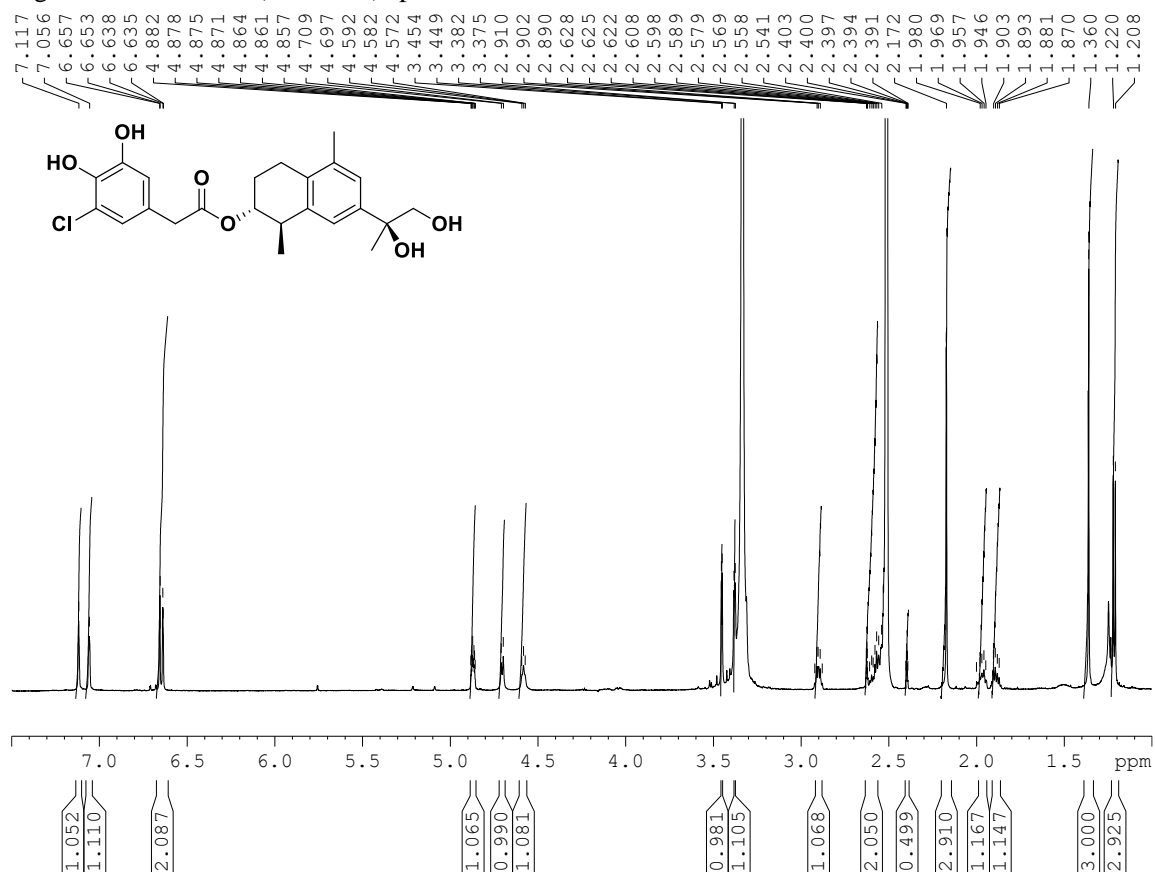



Figure S79.  $^{13}\text{C}$  NMR (150 MHz) and DEPT spectra of **10** in  $\text{DMSO}-d_6$

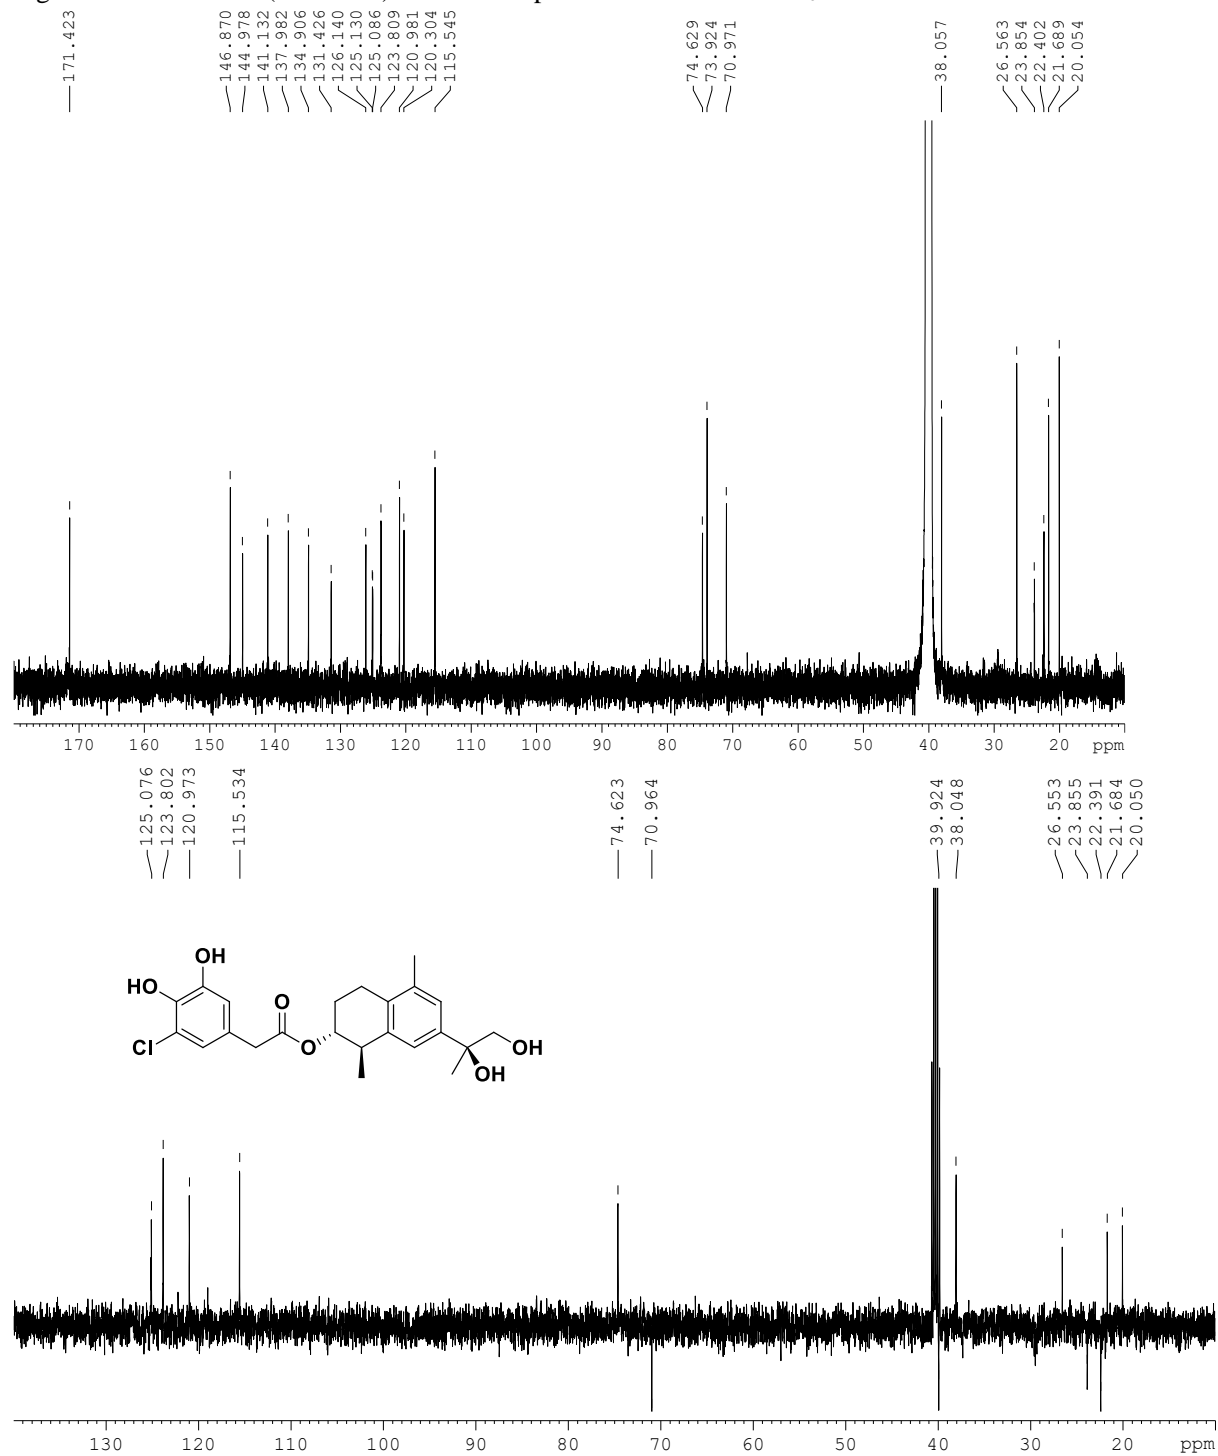



Figure S82. HMBC spectrum of **10** in DMSO-*d*<sub>6</sub>

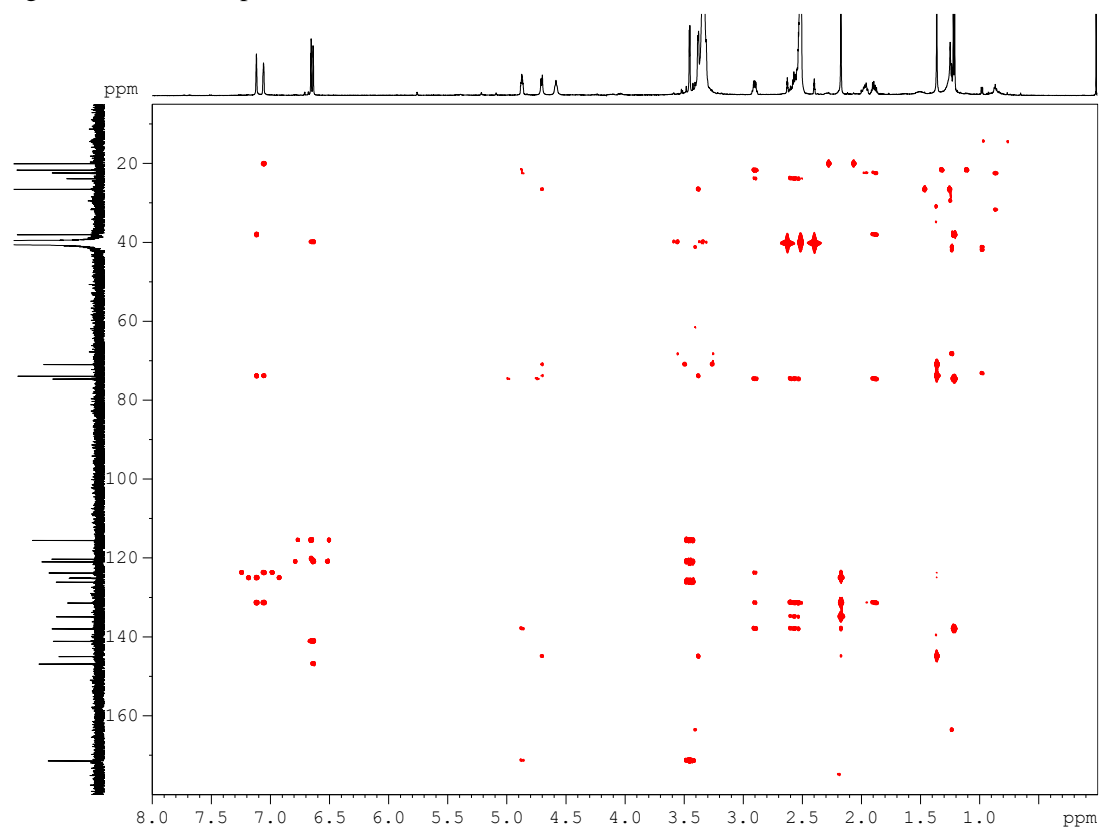

Figure S83. NOESY spectrum of **10** in DMSO-*d*<sub>6</sub>

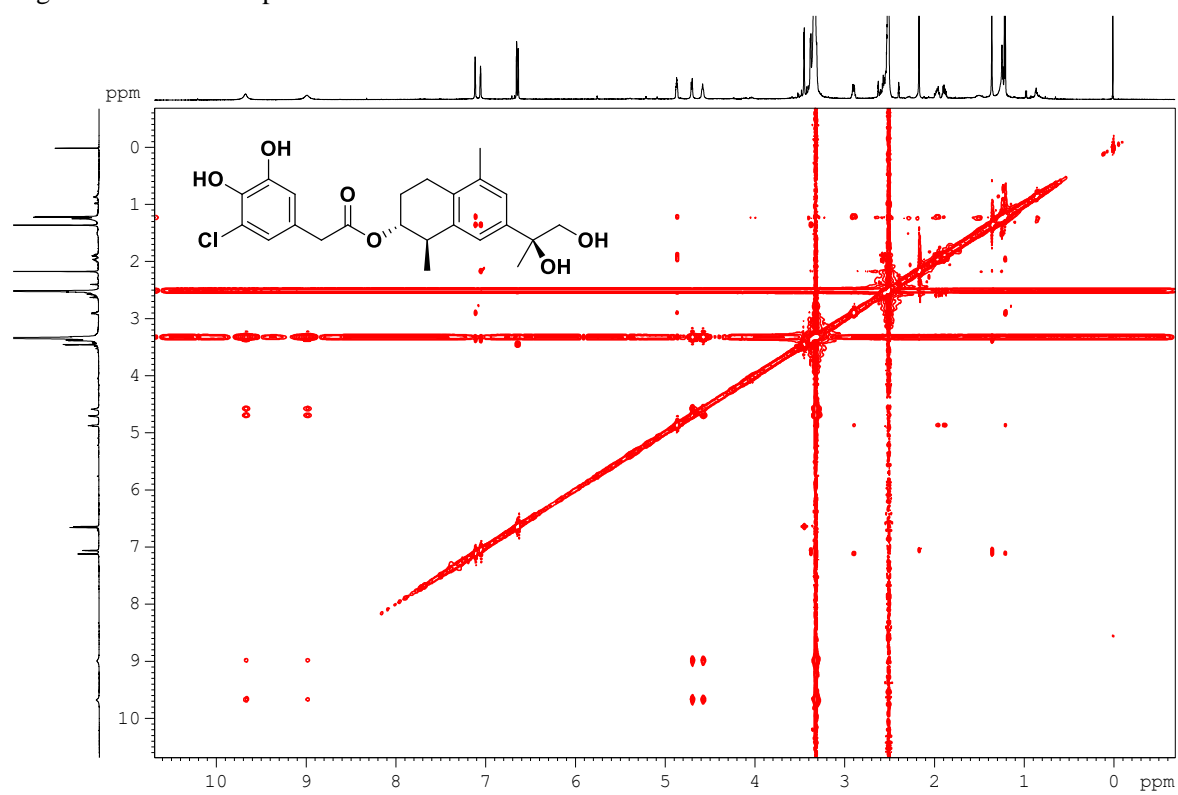

Figure S84. HRESIMS spectrum of **10** in DMSO-*d*<sub>6</sub>

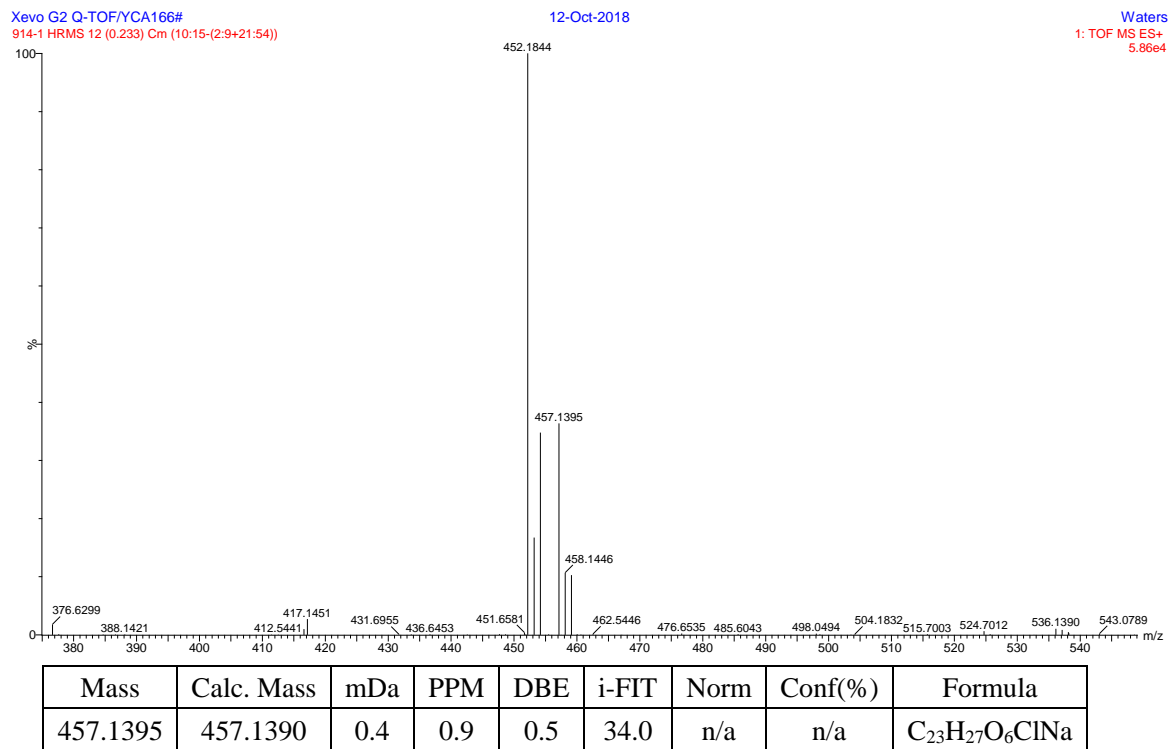

Figure S85. IR spectrum of **11**

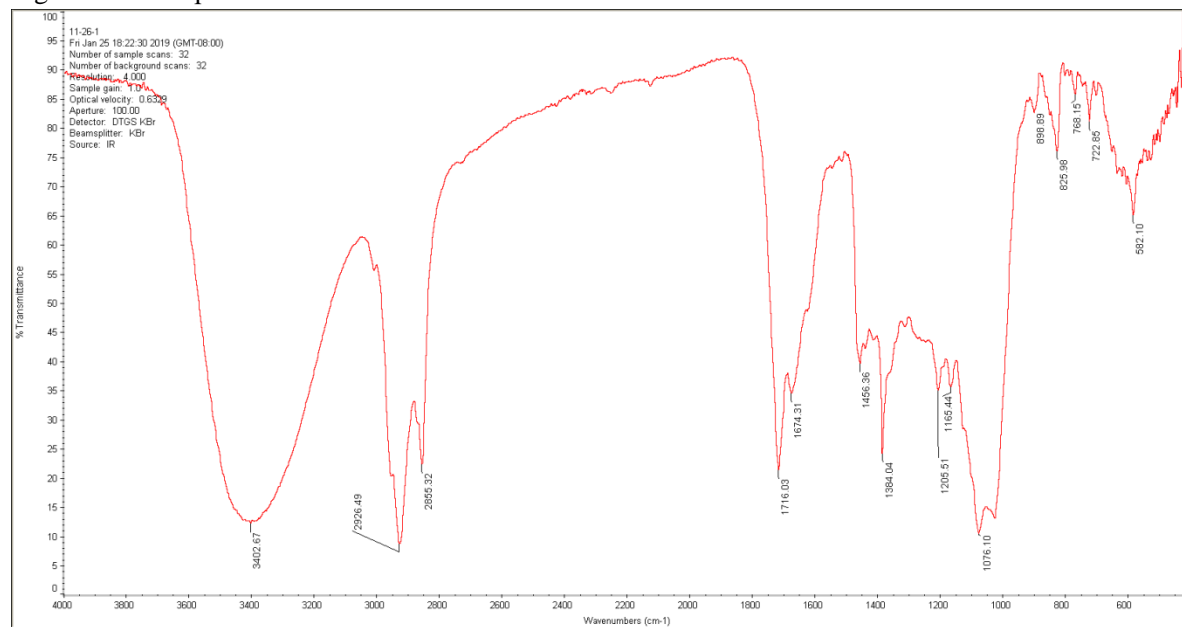

Figure S86.  $^1\text{H}$  NMR (600 MHz) spectrum of **11** in  $\text{DMSO}-d_6$

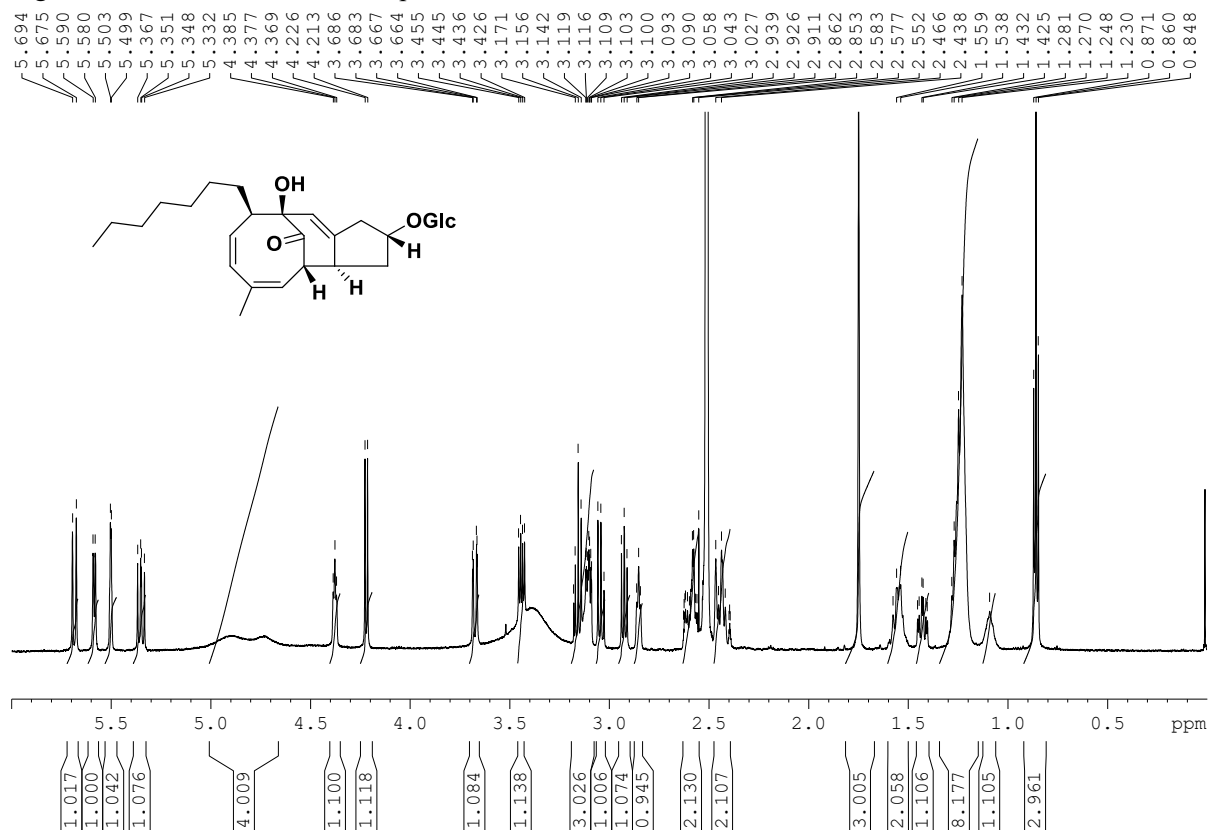

Figure S87.  $^{13}\text{C}$  NMR and DEPT (150 MHz) spectra of **11** in  $\text{DMSO}-d_6$

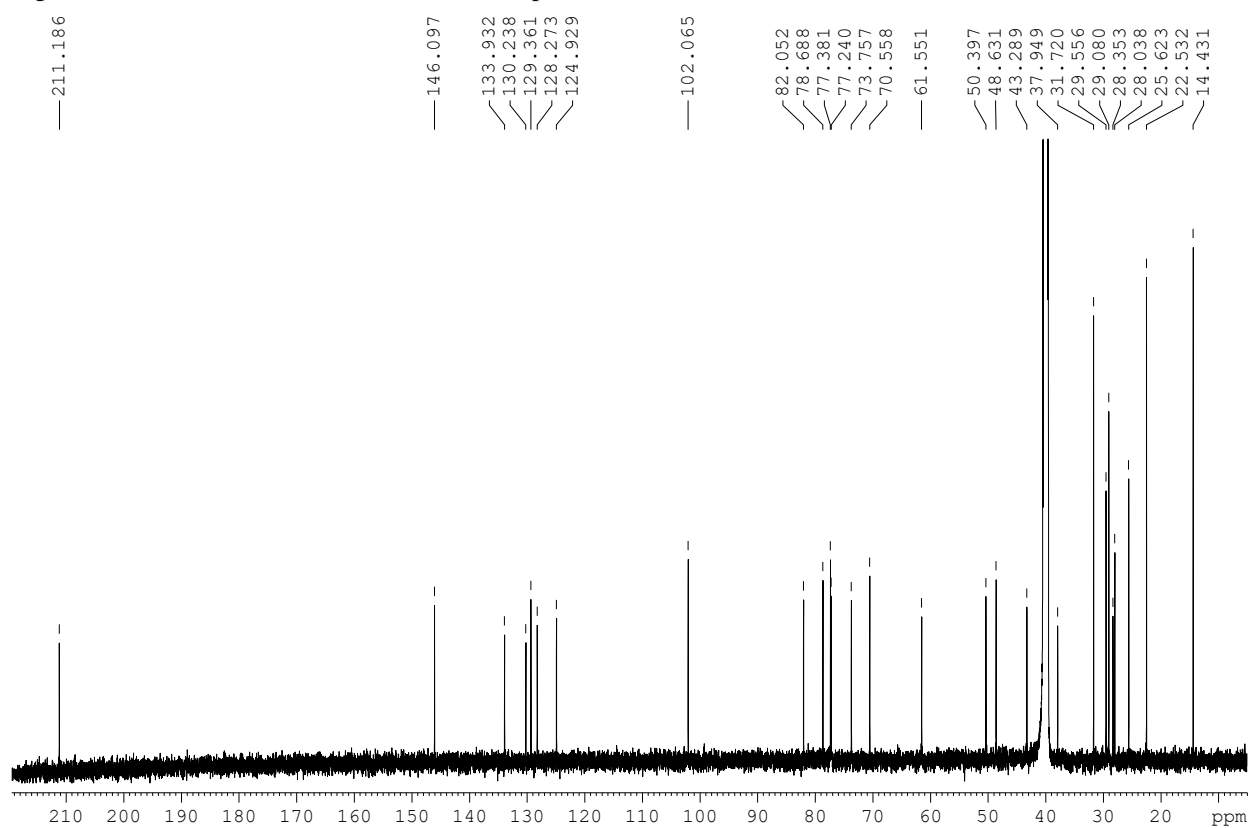

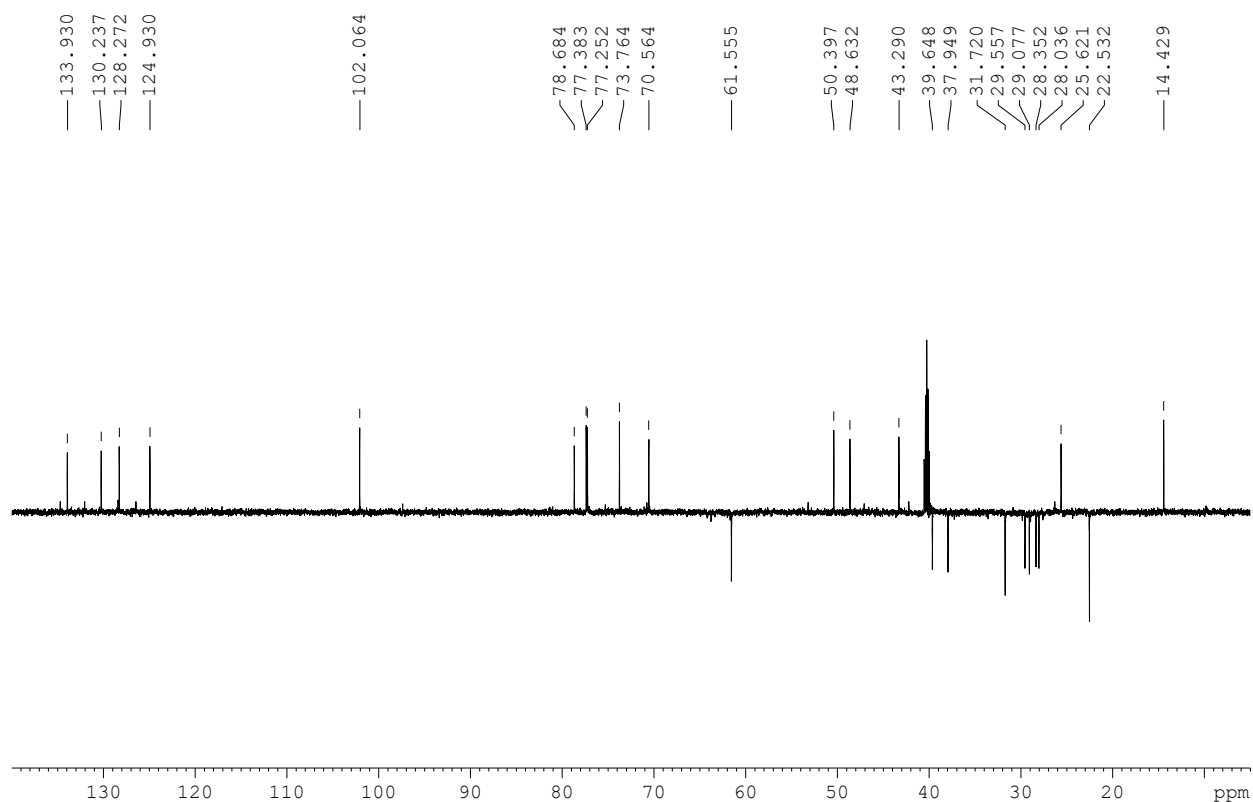

Figure S88.  $^1\text{H}$ - $^1\text{H}$  COSY spectrum of **11** in DMSO- $d_6$

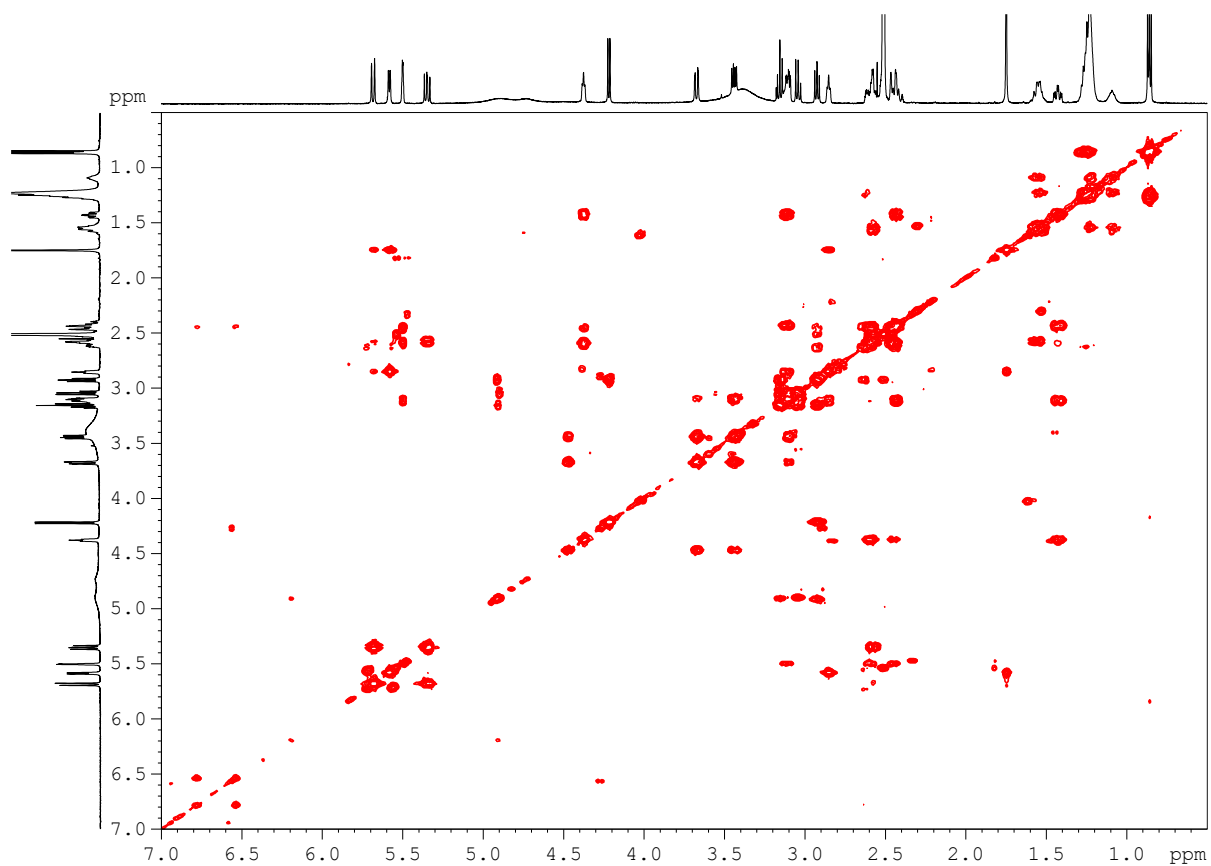

Figure S89. HSQC spectrum of **11** in DMSO-*d*<sub>6</sub>

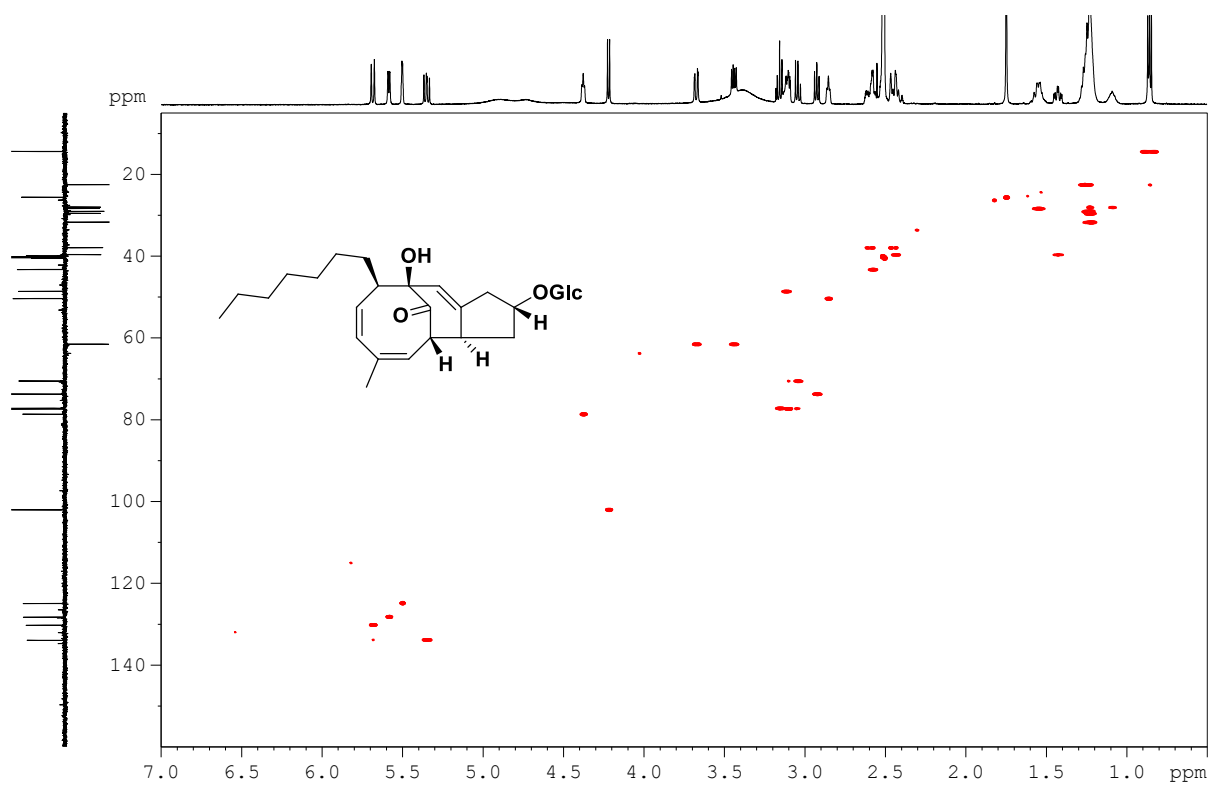

Figure S90. HMBC spectrum of **11** in DMSO-*d*<sub>6</sub>

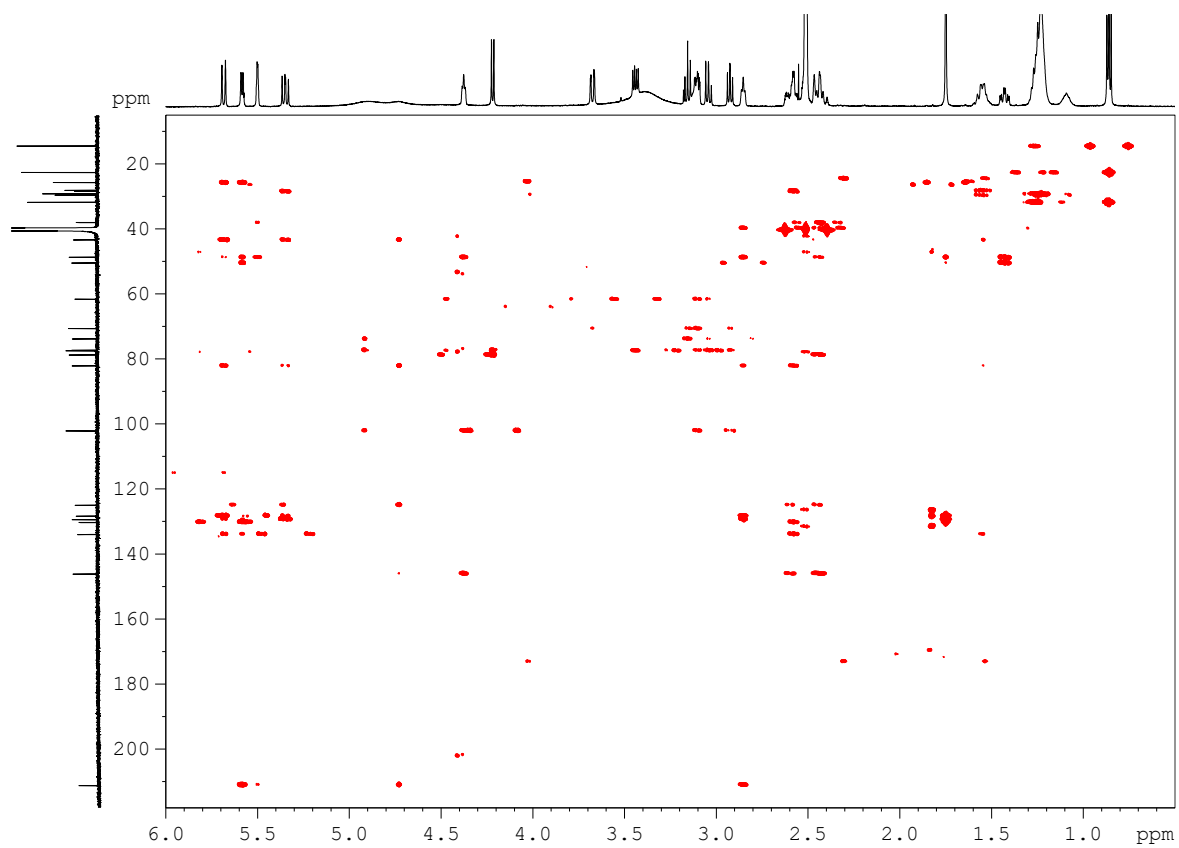

Figure S91. NOESY spectrum of **11** in DMSO-*d*<sub>6</sub>

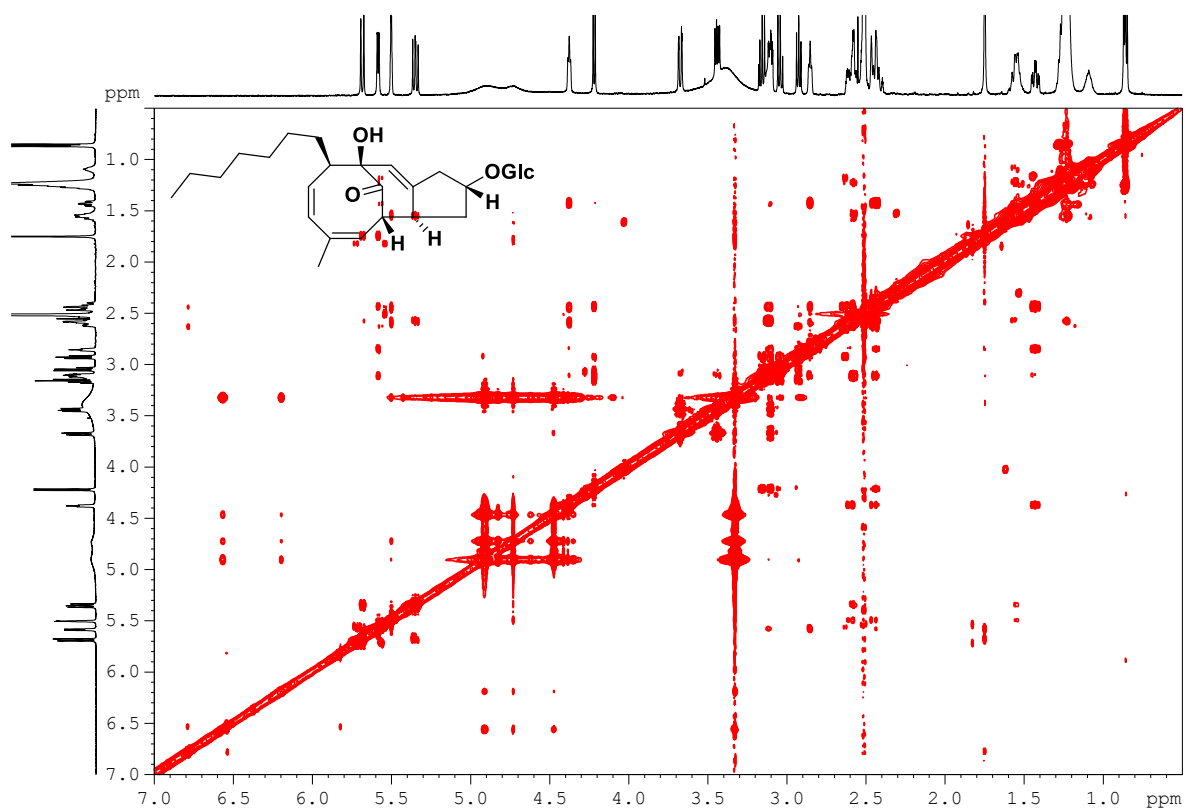

Figure S92. ROESY spectrum of **11** in DMSO-*d*<sub>6</sub>

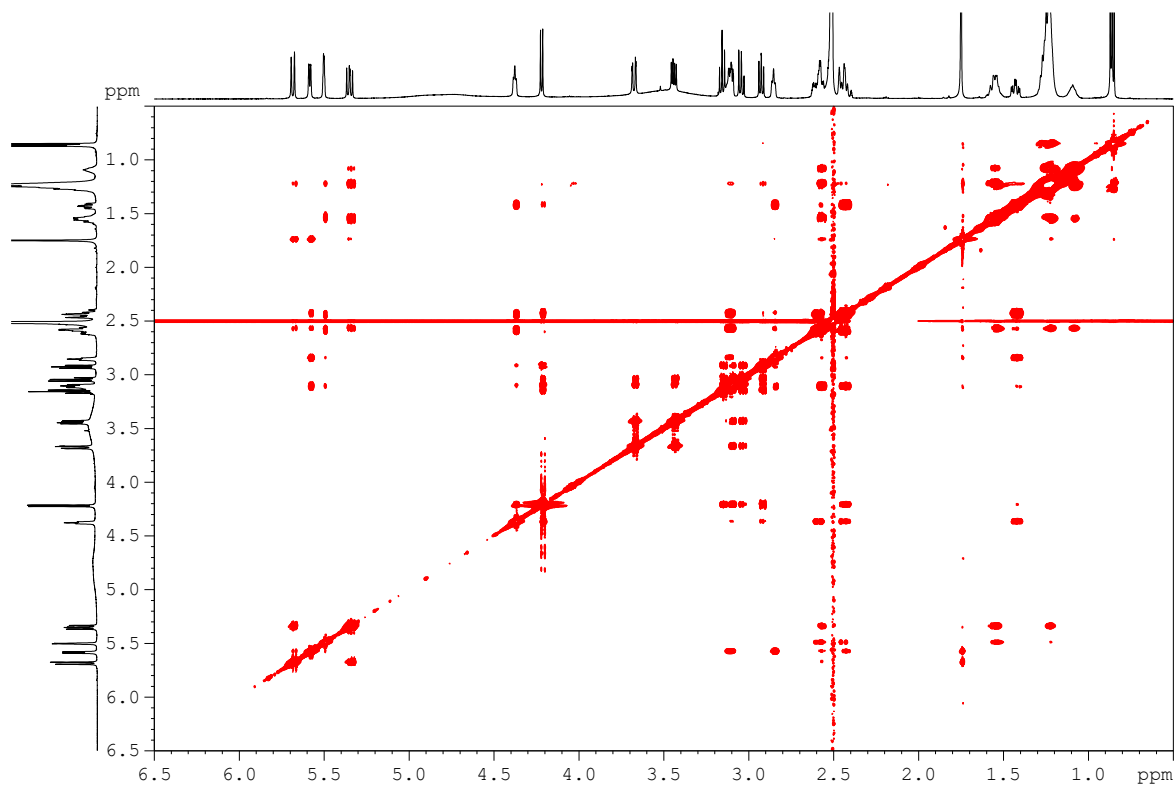



Figure S93. HRESIMS spectrum of **11**

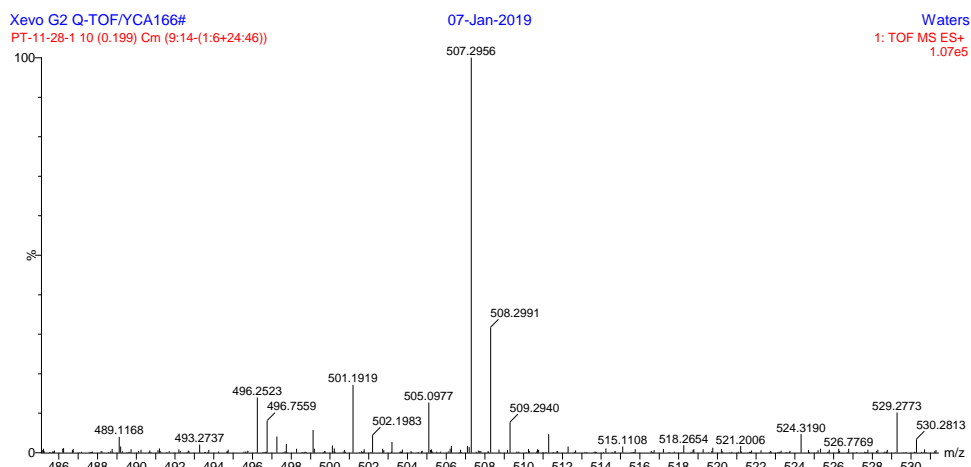

| Mass     | Calc. Mass | mDa  | PPM  | DBE | i-FIT | Norm  | Conf(%) | Formula                                        |
|----------|------------|------|------|-----|-------|-------|---------|------------------------------------------------|
| 507.2956 | 507.2958   | -0.2 | -0.4 | 7.5 | 166.9 | 1.373 | 25.33   | C <sub>28</sub> H <sub>43</sub> O <sub>8</sub> |

Figure S94. IR spectrum of **12**

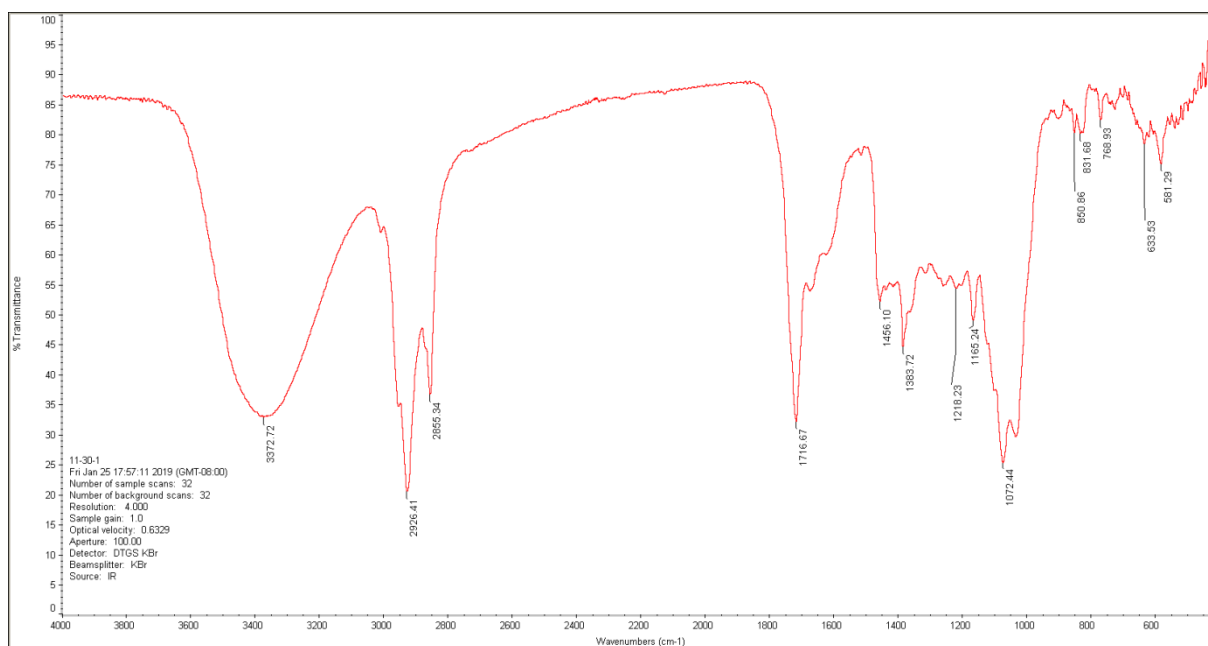

Figure S95.  $^1\text{H}$  NMR (600 MHz) spectrum of **12** in  $\text{DMSO}-d_6$

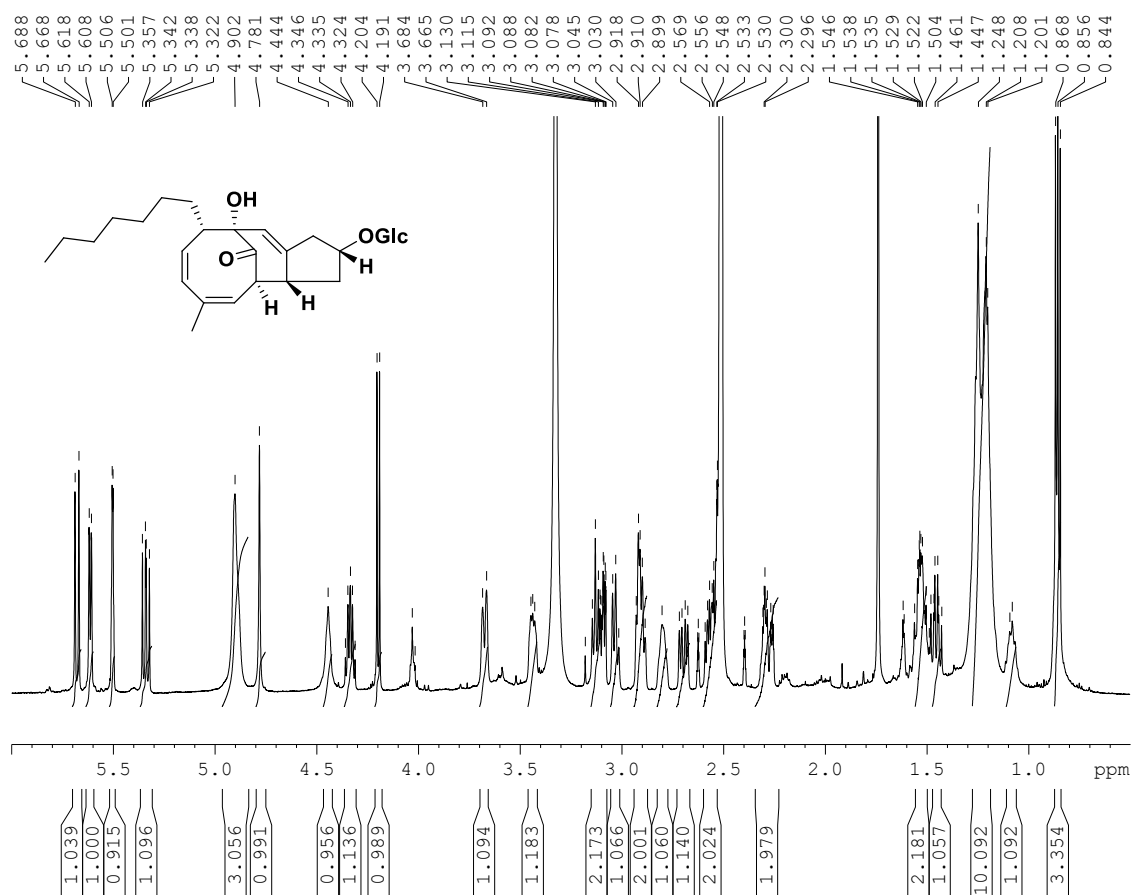

Figure S96.  $^{13}\text{C}$  NMR (150 MHz) spectrum of **12** in  $\text{DMSO}-d_6$

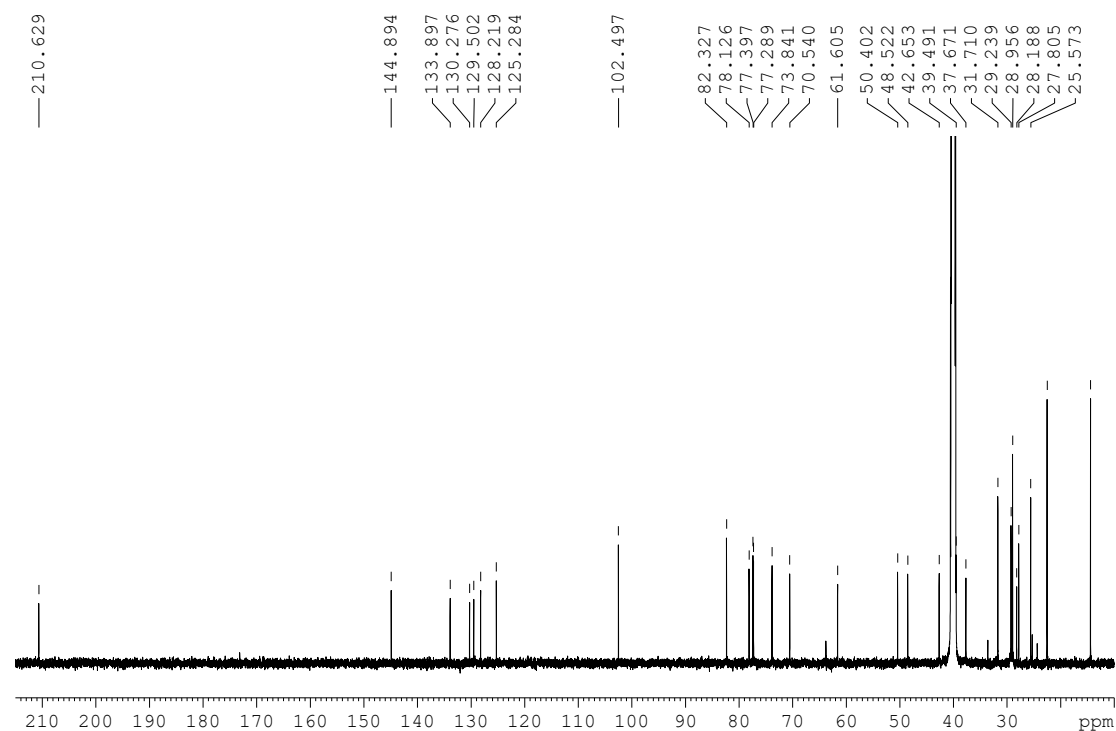

Figure S97. DEPT spectrum of **12** in DMSO-*d*<sub>6</sub>

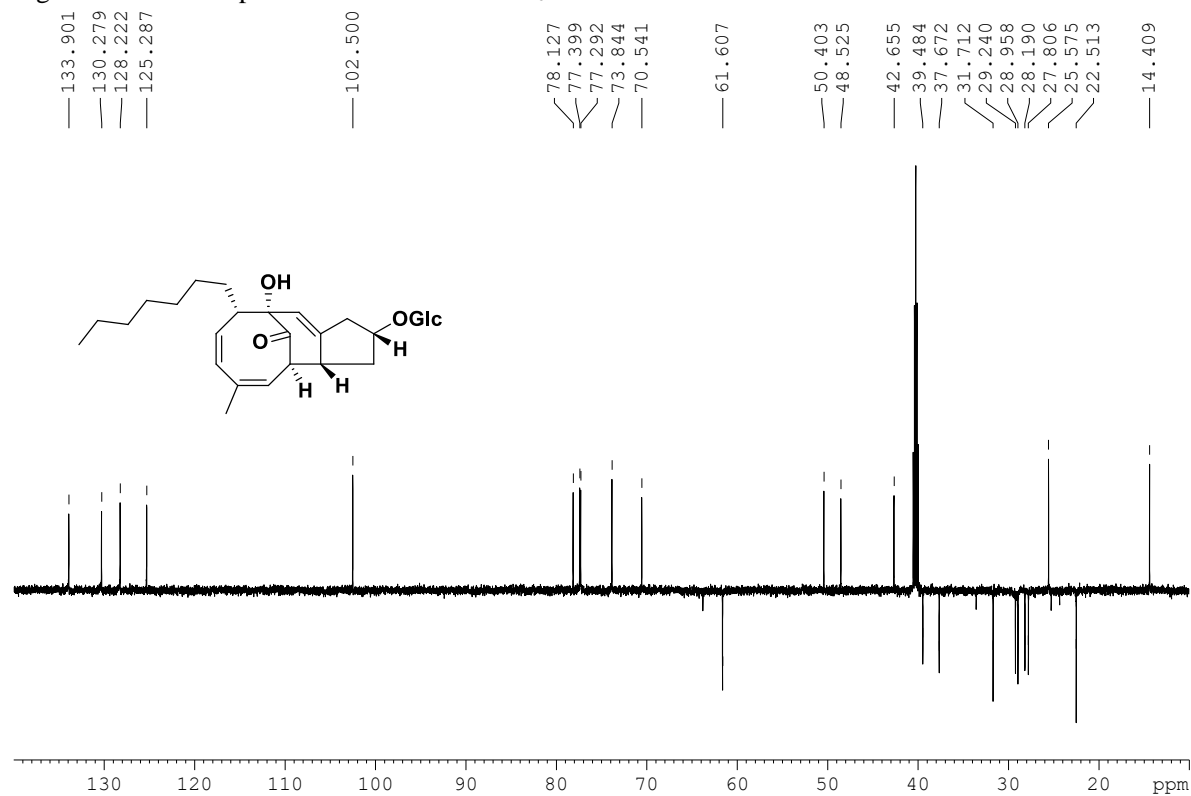

Figure S98. <sup>1</sup>H-<sup>1</sup>H COSY spectrum of **12** in DMSO-*d*<sub>6</sub>

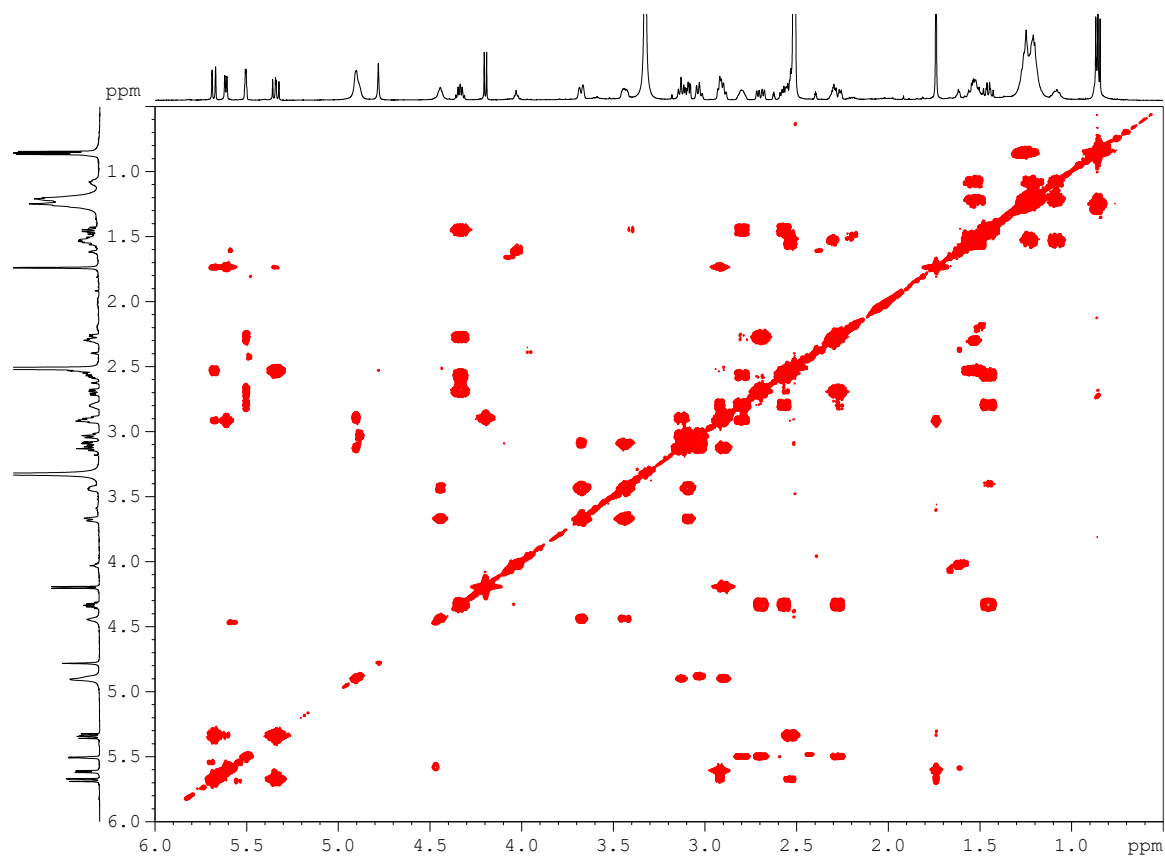

Figure S99. HSQC spectrum of **12** in DMSO-*d*<sub>6</sub>

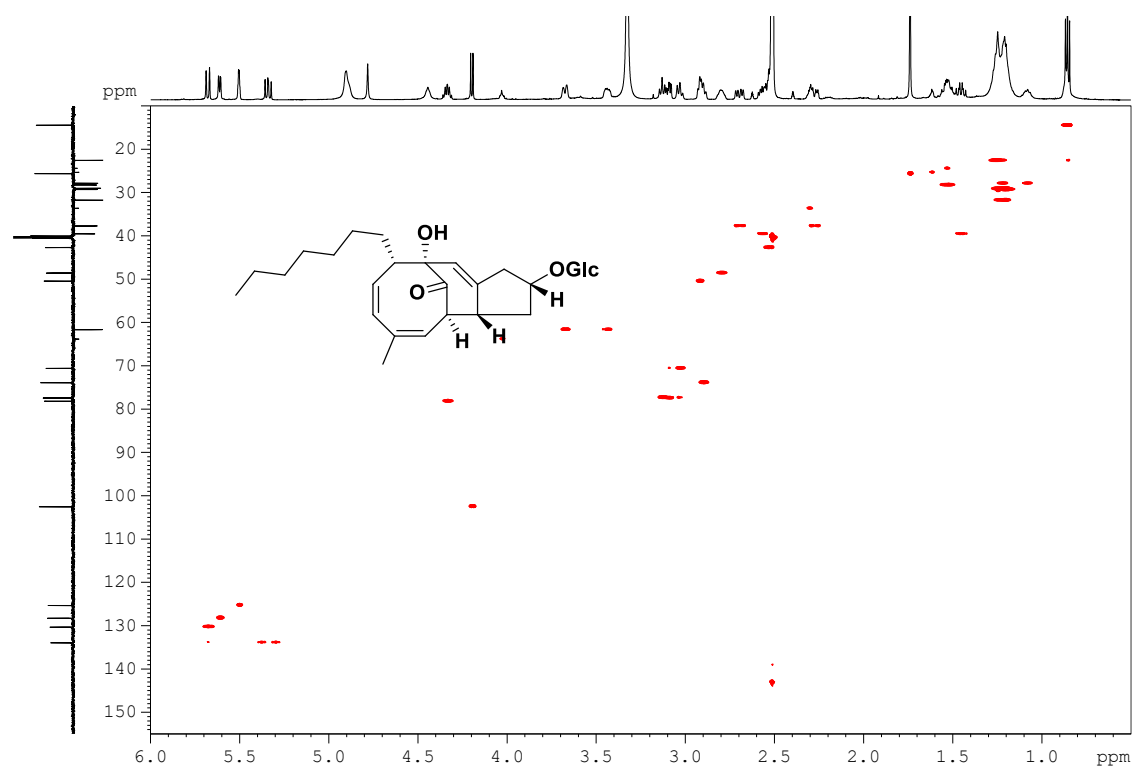

Figure S100. HMBC spectrum of **12** in DMSO-*d*<sub>6</sub>

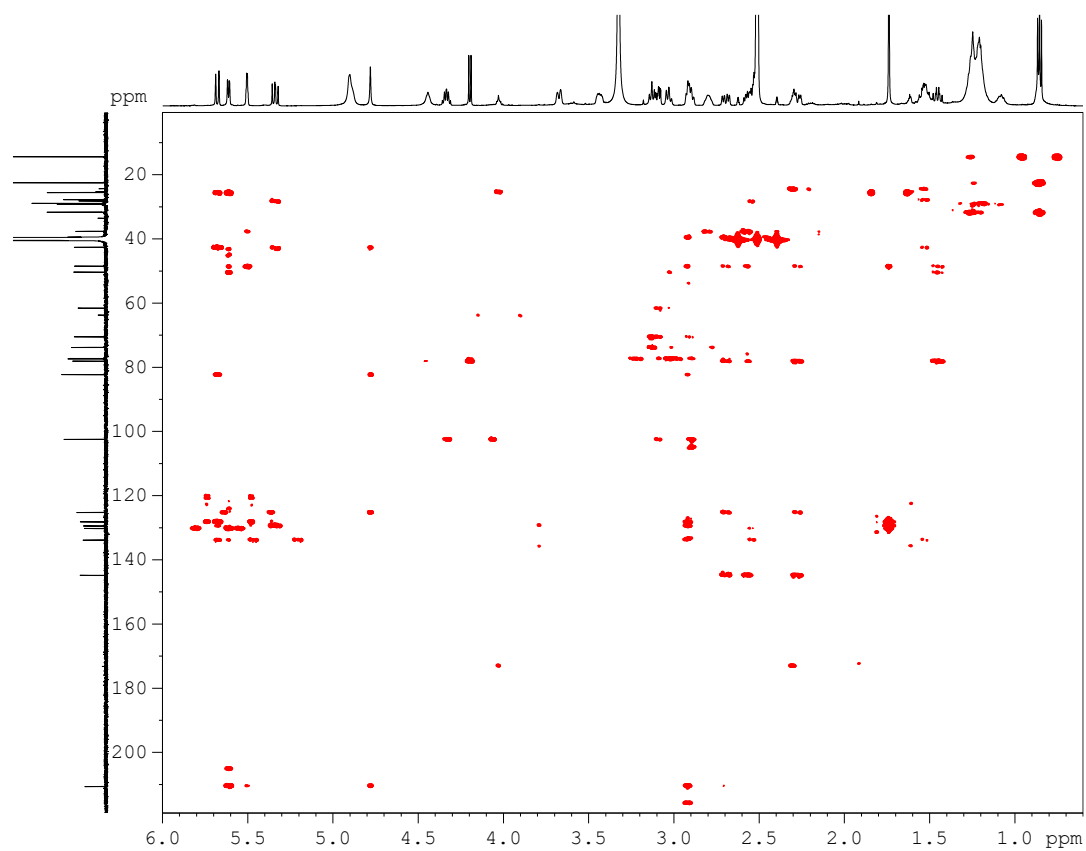

Figure S101. NOESY spectrum of **12** in DMSO-*d*<sub>6</sub>

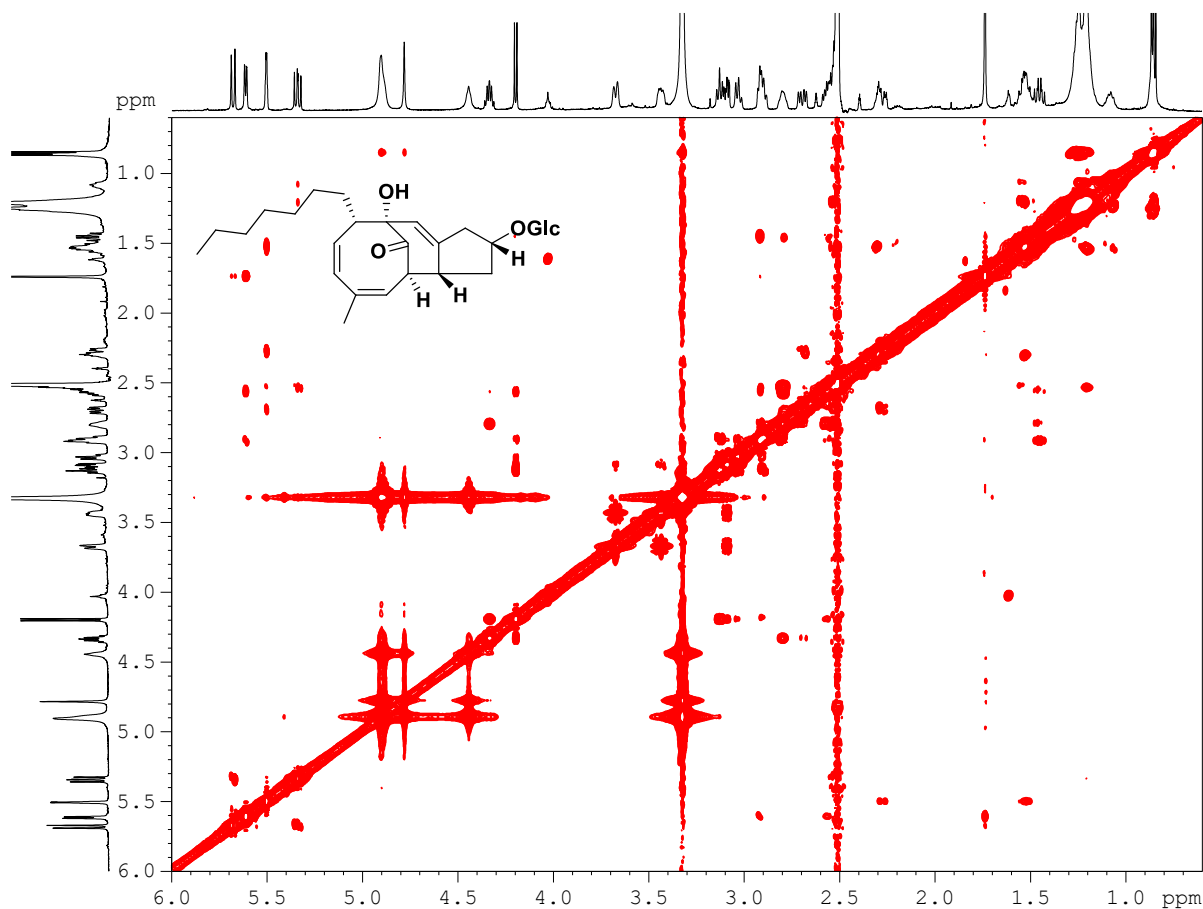

Figure S102. HRESIMS spectrum of **12**

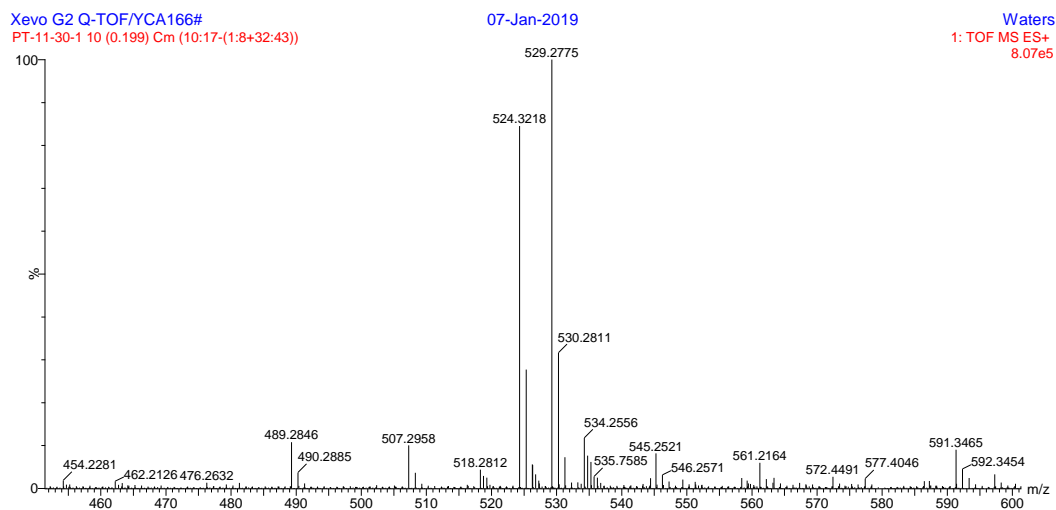

| Mass     | Calc. Mass | mDa | PPM | DBE | i-FIT | Norm  | Conf(%) | Formula                                        |
|----------|------------|-----|-----|-----|-------|-------|---------|------------------------------------------------|
| 507.2958 | 507.2958   | 0.0 | 0.0 | 7.5 | 382.4 | 6.116 | 0.22    | C <sub>28</sub> H <sub>43</sub> O <sub>8</sub> |

Figure S103. Part node clusters of EtOAc extract by molecular networking

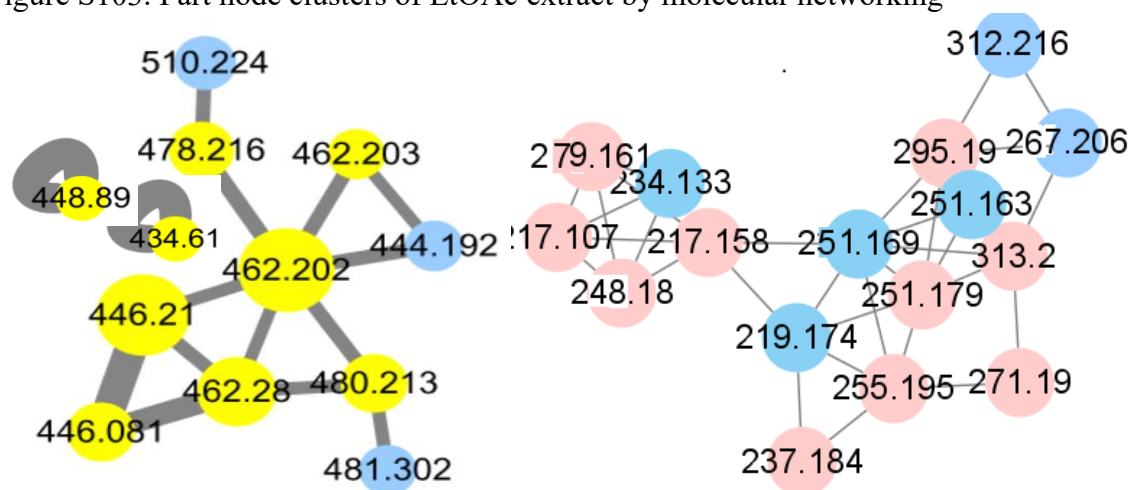

Figure S104. Key HMBC and COSY correlations of **1–10**.

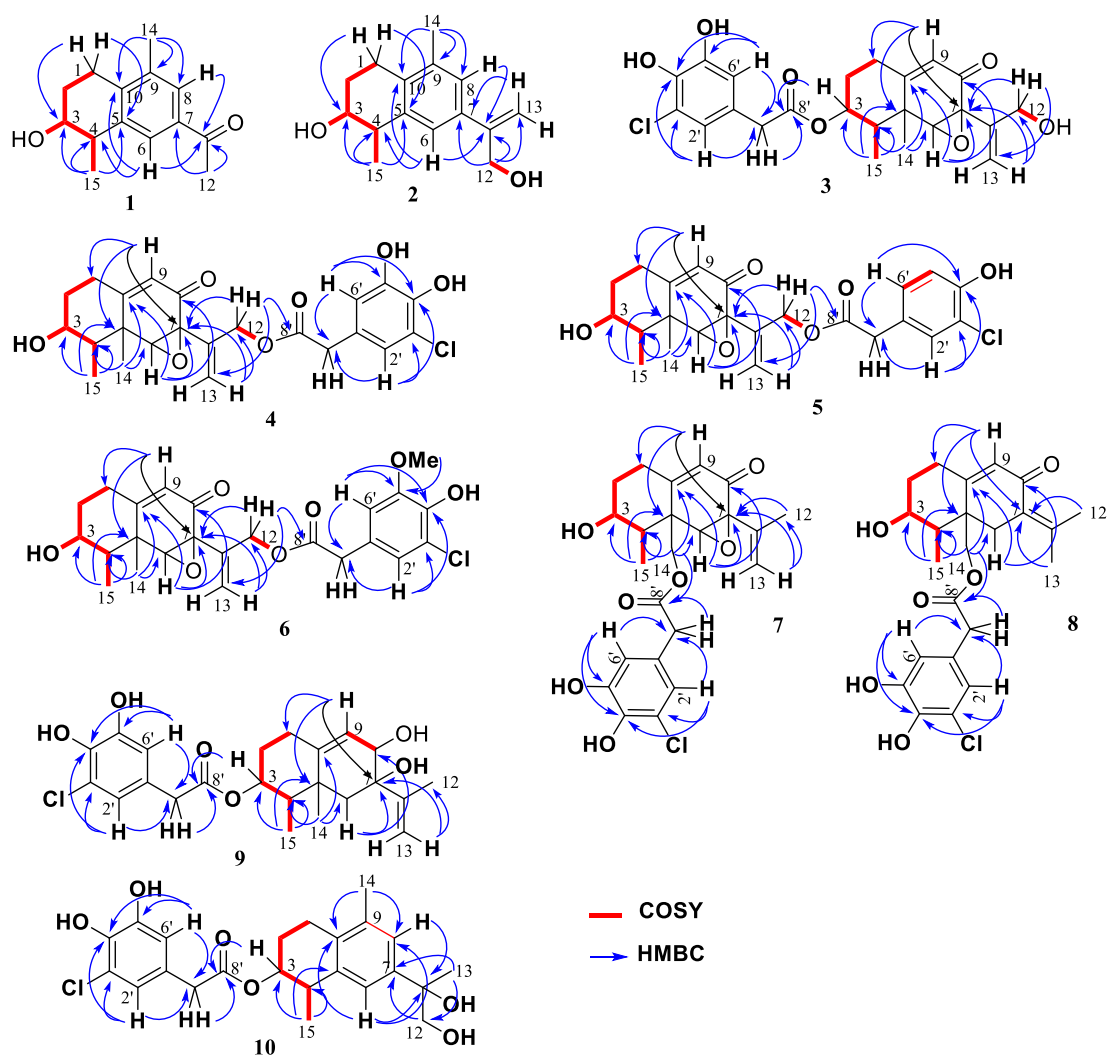

Supplement: s1 [file s1]
